# Supplementary material for: A computational study towards understanding the mechanism of phosphodiester cleavage by two mononuclear Zn(ii) complexes
Source: Royal Society of Chemistry journal article supplement (doi:10.1039/c004064a), 2010-01-01
Supplement: c004064a.pdf [file c004064a.pdf]

## Supporting Information

# **A Computational Study towards Understanding the Mechanism of Phosphodiester Cleavage by Two Mononuclear Zn(II) Complexes**

Hao Dong

*Department of Physics and Institute of Molecular Biophysics, Florida State  
University, Tallahassee, FL 32306*

E-mail: [hdong2@fsu.edu](mailto:hdong2@fsu.edu)

## Table of Contents

**Figure S1.** Optimized geometries of stationary points in the water-assisted proton transfer mode in the absence of catalyst. Distances are in Å. Certain hydrogen atoms are omitted for clarity.

**Figure S2.** Optimized geometries of stationary points in the direct proton transfer mode catalyzed by catalyst **B**. Distances are in Å. Certain hydrogen atoms are omitted for clarity.

**Figure S3.** Optimized geometries of stationary points in the general base mode catalyzed by catalyst **B**. Distances are in Å. Certain hydrogen atoms are omitted for clarity.

**Figure S4.** Optimized geometries of the reactant and the rate-determining transition state in the general base mode catalyzed by catalyst **B**. The active catalyst is of the Zn-OH form. Distances are in Å. Certain hydrogen atoms are omitted for clarity.

### The coordinates of all species

- (1) reaction with catalyst **A**:
- (2) reaction with catalyst **B**:
- (3) species in Gao's mechanism:
- (4) reaction in the water-assisted mode in the absence of catalyst

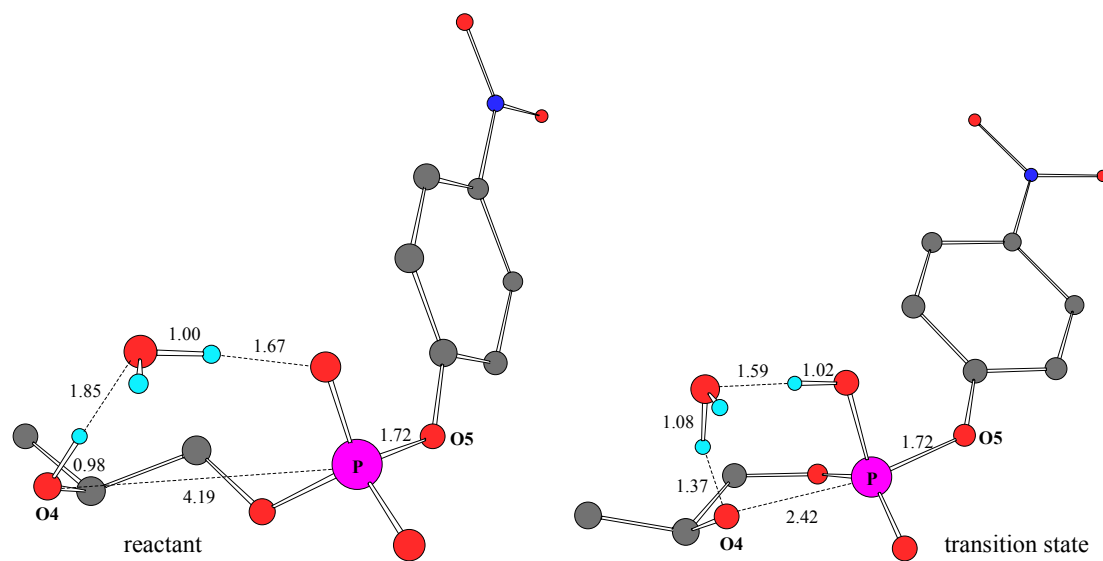

**Figure S1.** Optimized geometries of stationary points in the water-assisted proton transfer mode in the absence of catalyst. Distances are in Å. Certain hydrogen atoms are omitted for clarity.

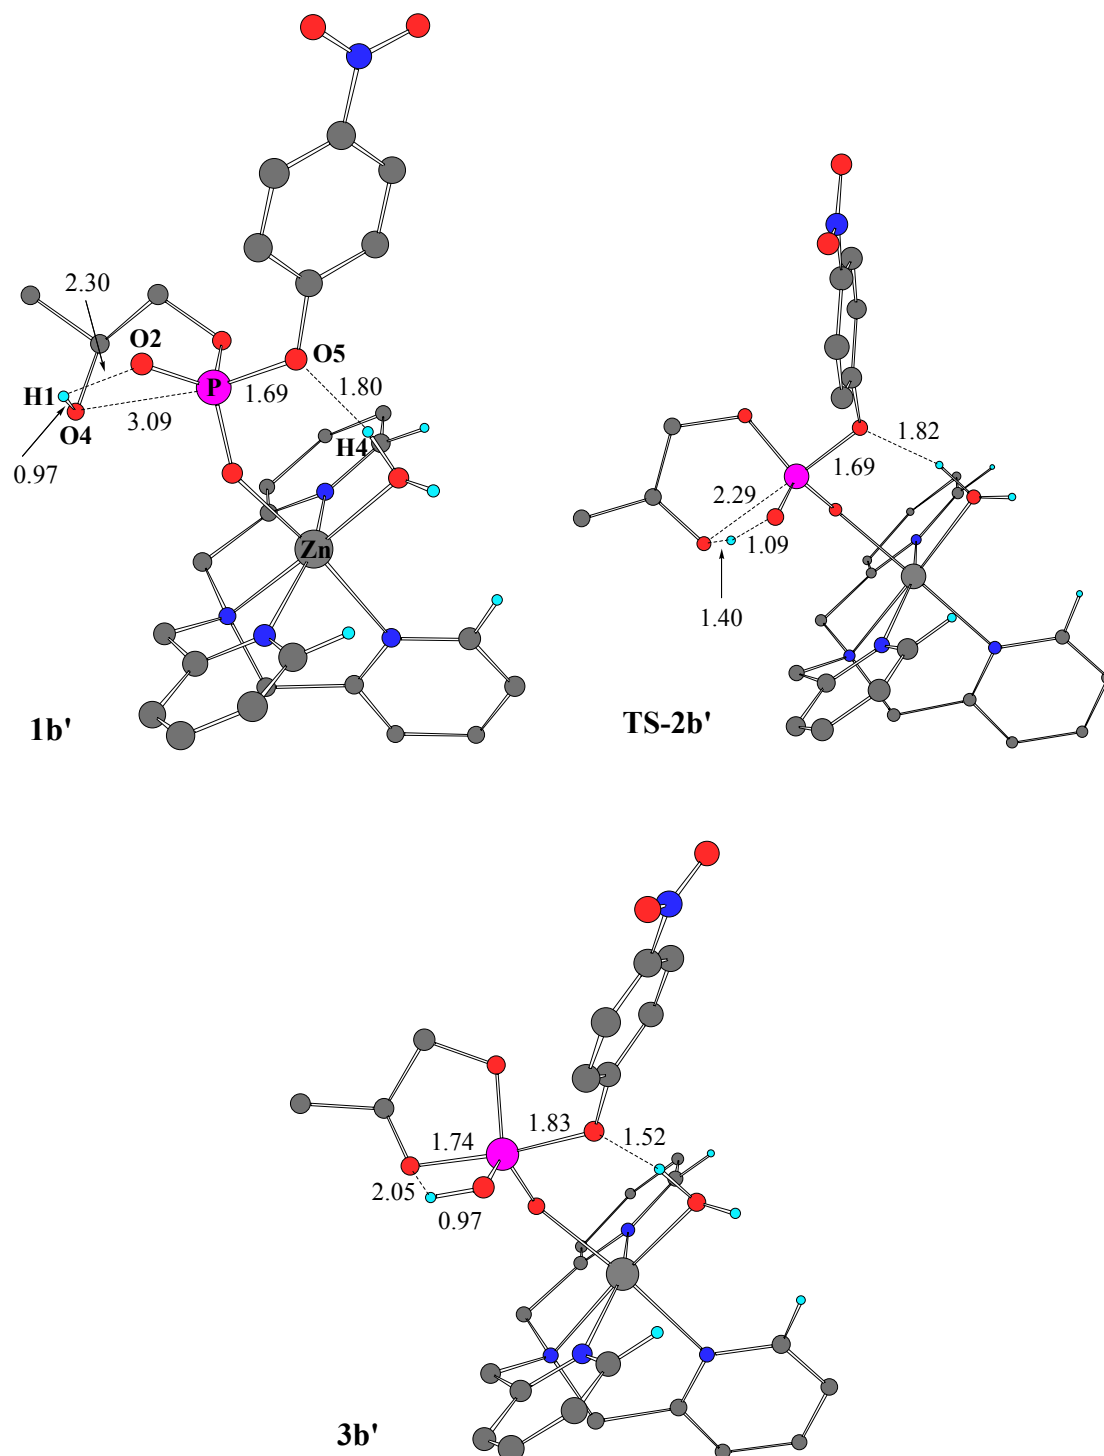

**Figure S2.** Optimized geometries of stationary points in the direct proton transfer mode catalyzed by catalyst **B**. Distances are in Å. Certain hydrogen atoms are omitted for clarity.

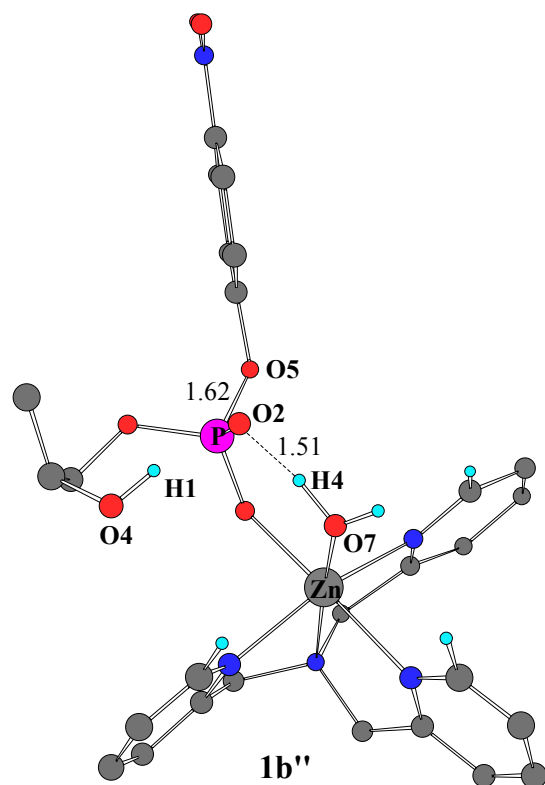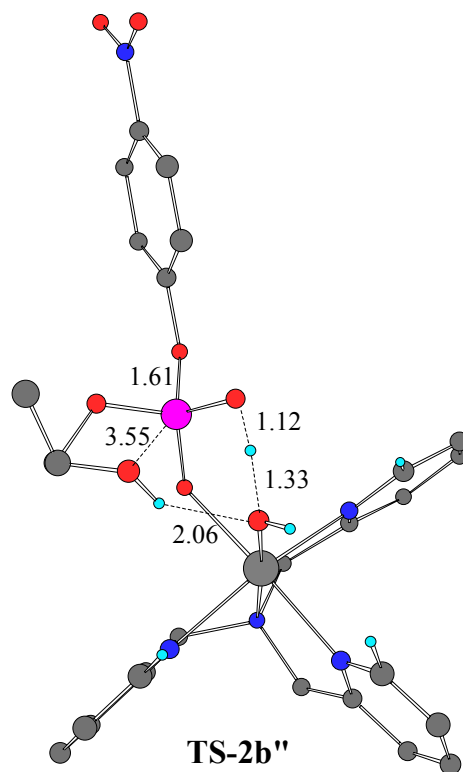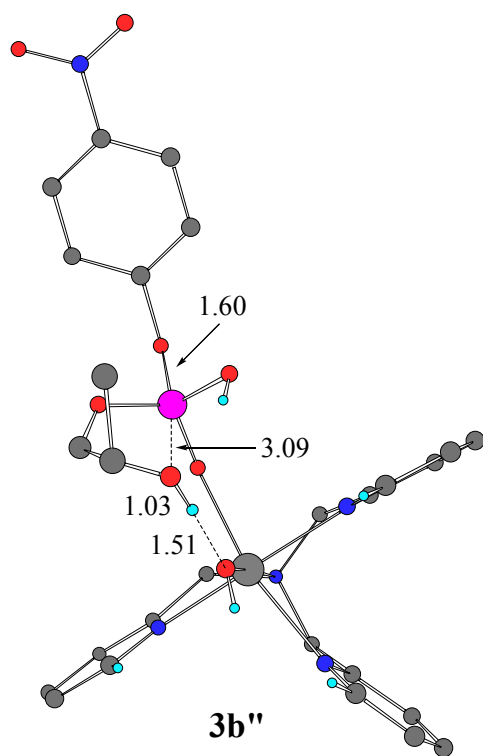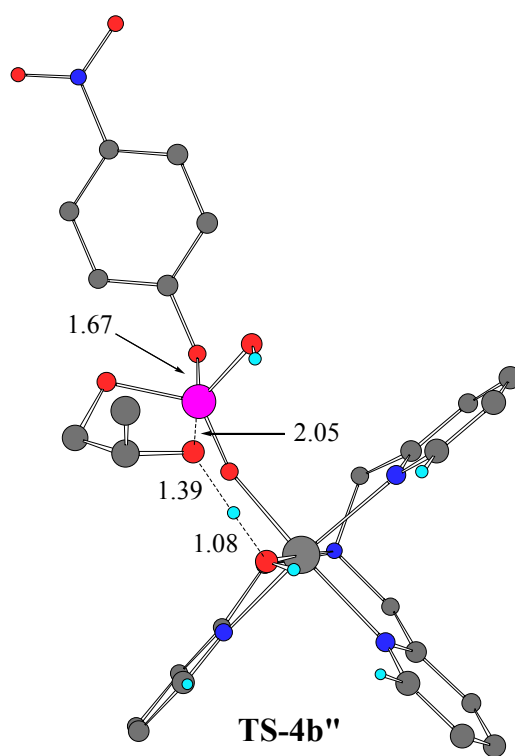

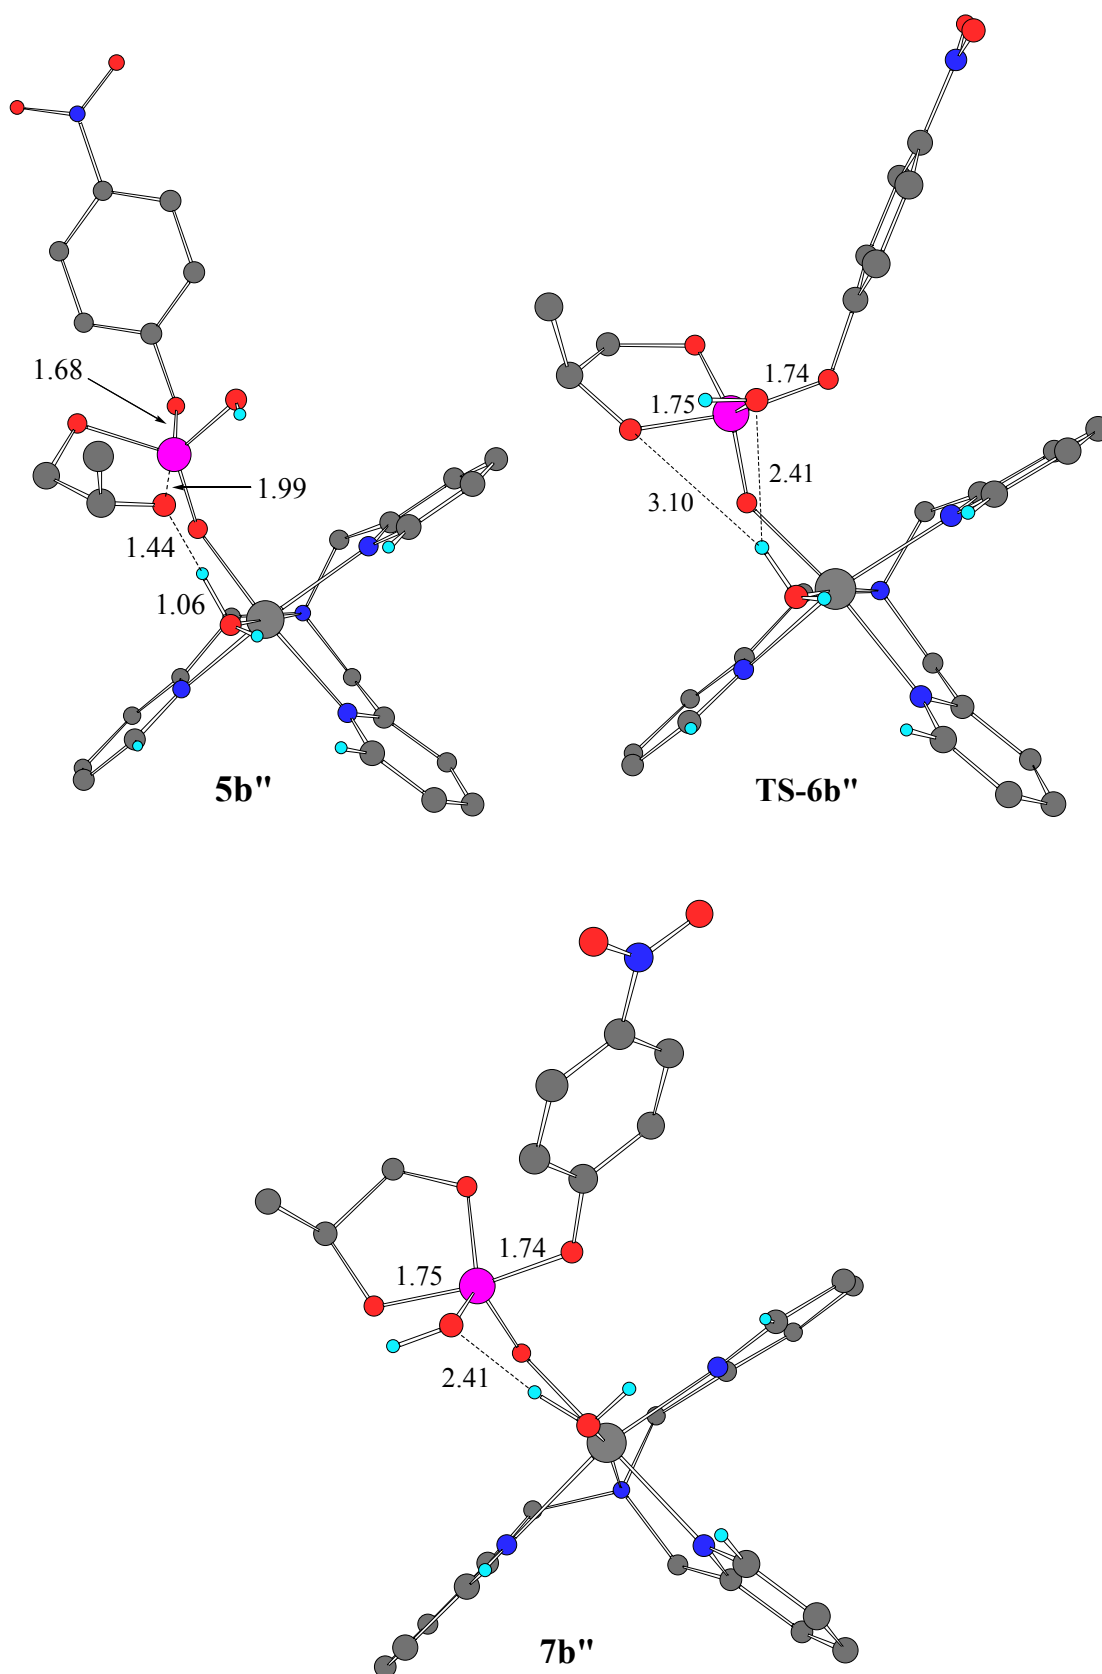

**Figure S3.** Optimized geometries of stationary points in the general base mode catalyzed by catalyst **B**. Distances are in Å. Certain hydrogen atoms are omitted for clarity.

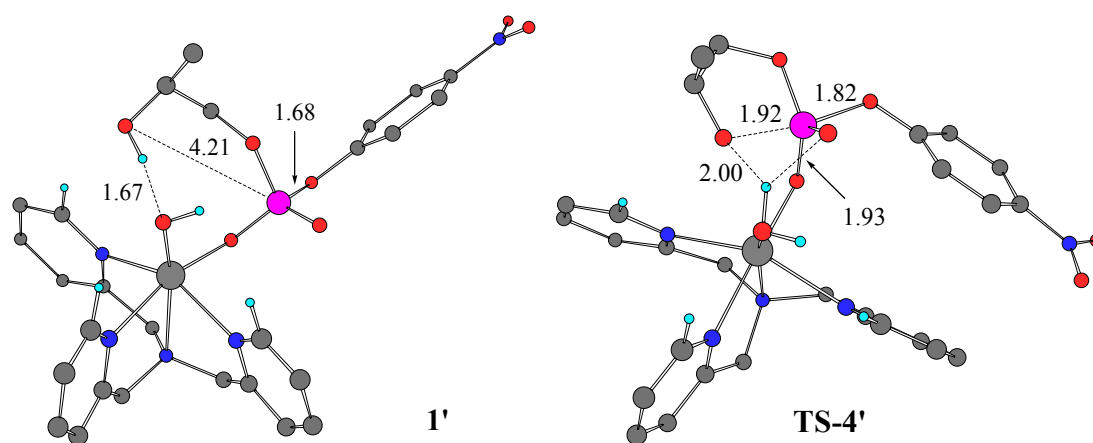

**Figure S4.** Optimized geometries of the reactant and the rate-determining transition state in the general base mode catalyzed by catalyst **B**. The active catalyst is of the Zn-OH form. Distances are in Å. Certain hydrogen atoms are omitted for clarity.

## The coordinates of all species

### (1) catalyst A:

#### 1a:

|   |             |             |             |
|---|-------------|-------------|-------------|
| N | -2.96096100 | 0.89678600  | 0.87597200  |
| C | -2.91894100 | 0.40851400  | 2.27090900  |
| C | -4.27321100 | 0.64697800  | 0.23013100  |
| C | -2.52291500 | 2.31068700  | 0.75875900  |
| C | -4.34442200 | -0.62793900 | -0.59843000 |
| C | -5.51463800 | -1.37161000 | -0.67224700 |
| C | -5.55699100 | -2.46001800 | -1.55342900 |
| C | -3.31962500 | -1.92772900 | -2.23603600 |
| C | -4.46189000 | -2.73880700 | -2.35621500 |
| C | -2.15543300 | 2.65177200  | -0.67212300 |
| C | -2.45742300 | 3.88973600  | -1.22247200 |
| C | -2.04043400 | 4.15494700  | -2.53424200 |
| C | -1.09580100 | 1.94730900  | -2.62322600 |
| C | -1.35797900 | 3.18363300  | -3.24616100 |
| C | -2.91701700 | -1.10560400 | 2.33717700  |
| C | -3.67181500 | -1.79519900 | 3.27460400  |
| C | -3.54418900 | -3.19041200 | 3.33277900  |
| C | -1.91840300 | -3.05652800 | 1.56920700  |
| C | -2.65985100 | -3.83197200 | 2.48452000  |
| N | -2.08373600 | -1.72624500 | 1.47133500  |
| N | -3.24969100 | -0.93436600 | -1.33081000 |
| N | -1.48772600 | 1.69598500  | -1.36036100 |
| N | -0.47106900 | 0.91787300  | -3.31136100 |
| N | -1.00424700 | -3.63951300 | 0.70674400  |
| N | -2.19318500 | -2.11785300 | -3.03833900 |
| H | -0.21220500 | -3.04986100 | 0.48542200  |
| H | -2.34674000 | -2.74293700 | -3.82060900 |
| H | -1.76719200 | -1.24242800 | -3.33910100 |
| H | -3.75254800 | 0.81579000  | 2.86029200  |
| H | -1.98310700 | 0.76977600  | 2.71131700  |
| H | -4.47219400 | 1.48018200  | -0.45394300 |
| H | -5.07743400 | 0.65164000  | 0.97671300  |
| H | -1.62595000 | 2.44623600  | 1.37548200  |
| H | -3.29474100 | 3.00163200  | 1.12502700  |
| H | -6.37429400 | -1.10924900 | -0.06493700 |
| H | -6.45278900 | -3.06953400 | -1.62675100 |
| H | -4.48500000 | -3.54833100 | -3.07906600 |
| H | -2.99645200 | 4.63132200  | -0.64291200 |
| H | -2.25382200 | 5.11597500  | -2.99277800 |



|    |             |             |             |
|----|-------------|-------------|-------------|
| H  | -1.02758800 | 3.35937000  | -4.26519200 |
| H  | -4.33240600 | -1.26273600 | 3.95048100  |
| H  | -4.12152100 | -3.76411700 | 4.05176700  |
| H  | -2.51554200 | -4.90702600 | 2.52871700  |
| Zn | -1.40101300 | -0.23164800 | -0.19190000 |
| O  | 0.04312300  | -1.34166200 | -1.42145800 |
| H  | 0.03732200  | 1.20110000  | -4.13875400 |
| H  | -0.21285900 | -2.17153100 | -1.85447400 |
| H  | 0.03663600  | 0.25485300  | -2.73292800 |
| H  | -0.73353400 | -4.58671000 | 0.93568100  |
| H  | 3.15817500  | 3.31355500  | -0.38795200 |
| C  | 2.51465800  | 2.95629300  | 0.42122300  |
| O  | 2.00819000  | 1.67498900  | -0.02899600 |
| C  | 1.38086900  | 3.95448000  | 0.67670200  |
| H  | 3.12153200  | 2.81434400  | 1.32051500  |
| P  | 1.66507700  | 0.47428900  | 1.00123500  |
| C  | 1.94926000  | 5.32672600  | 1.04934700  |
| H  | 0.78962100  | 4.03850600  | -0.24344200 |
| O  | 0.46648400  | 3.47067300  | 1.65811600  |
| O  | 2.40626500  | 0.57454300  | 2.29705500  |
| O  | 2.23780700  | -0.82790800 | 0.08040000  |
| O  | 0.17308400  | 0.17717100  | 0.99209400  |
| H  | 2.54519200  | 5.26410100  | 1.96657800  |
| H  | 2.58603900  | 5.72674600  | 0.25201100  |
| H  | 1.13107600  | 6.03172100  | 1.22118300  |
| H  | 0.92525100  | 3.39939100  | 2.52269900  |
| H  | 2.06704100  | 2.76054000  | 4.79282600  |
| O  | 2.05884200  | 2.80134900  | 3.83022600  |
| H  | 2.24519300  | 1.90088900  | 3.48153900  |
| H  | 0.92627400  | -1.38630700 | -0.98061000 |
| C  | 3.59825000  | -1.05328900 | -0.12650200 |
| C  | 4.43036000  | -1.39459300 | 0.94366700  |
| C  | 4.08361000  | -0.99064100 | -1.43505300 |
| C  | 5.76987100  | -1.68173200 | 0.69427800  |
| H  | 4.02886300  | -1.41600400 | 1.95003100  |
| C  | 5.42090600  | -1.28461500 | -1.68654900 |
| H  | 3.41644800  | -0.70633500 | -2.24268600 |
| C  | 6.24420700  | -1.62677900 | -0.61576300 |
| H  | 6.44734700  | -1.95037500 | 1.49548400  |
| H  | 5.83339000  | -1.24925300 | -2.68720200 |
| N  | 7.65823600  | -1.94212700 | -0.87903800 |
| O  | 8.36121800  | -2.24018400 | 0.08389100  |
| O  | 8.04215500  | -1.88837700 | -2.04633900 |

**1a (TPSS/Gao's basis set):**

|    |             |             |             |
|----|-------------|-------------|-------------|
| Zn | -1.41698600 | -0.20152300 | -0.19330600 |
| P  | 1.60208000  | 0.68784500  | 1.04201700  |
| N  | -2.93332000 | 1.00673600  | 0.75629300  |
| N  | -1.97099800 | -1.51663300 | 1.57499000  |
| N  | -3.24405100 | -1.07378000 | -1.18218000 |
| N  | -1.46791700 | 1.52656300  | -1.53293400 |
| N  | -0.51804000 | 0.49879500  | -3.40731200 |
| N  | -0.67190000 | -3.38107700 | 1.04896700  |
| N  | -2.19336200 | -2.54350900 | -2.66068200 |
| N  | 7.47256400  | -2.14654800 | -0.88275400 |
| O  | 0.02520200  | -1.39142000 | -1.25852600 |
| O  | 0.07414700  | 0.43352800  | 1.02771400  |
| O  | 2.11436800  | -0.80239500 | 0.25288800  |
| O  | 2.36391100  | 0.85851500  | 2.35021800  |
| O  | 2.07957400  | 1.70958500  | -0.16167500 |
| O  | 0.61325900  | 3.54558000  | 1.46493700  |
| O  | 2.21816900  | 3.23786100  | 3.65637500  |
| O  | 7.73806700  | -2.46928000 | -2.05573200 |
| O  | 8.29464000  | -2.11318600 | 0.05010400  |
| C  | -2.93150000 | 0.62464700  | 2.19150500  |
| C  | -4.24781900 | 0.74425500  | 0.10571000  |
| C  | -2.44683200 | 2.39948600  | 0.52249500  |
| C  | -4.34991700 | -0.63883800 | -0.52157100 |
| C  | -5.54299000 | -1.36077100 | -0.50386800 |
| C  | -5.59968600 | -2.57685300 | -1.20890900 |
| C  | -4.49470300 | -3.00025800 | -1.94101700 |
| C  | -3.32908300 | -2.20197600 | -1.92764200 |
| C  | -2.09573500 | 2.58149500  | -0.94451500 |
| C  | -2.37417200 | 3.76275400  | -1.62948600 |
| C  | -1.98134500 | 3.86215900  | -2.97784000 |
| C  | -1.34321300 | 2.79028300  | -3.59030800 |
| C  | -1.09636300 | 1.61969800  | -2.83374600 |
| C  | -2.88421600 | -0.88570600 | 2.35647800  |
| C  | -3.65900800 | -1.56255500 | 3.29801600  |
| C  | -3.47065800 | -2.94956500 | 3.44285300  |
| C  | -2.48766900 | -3.59258000 | 2.69614700  |
| C  | -1.72078000 | -2.82745400 | 1.78801000  |
| C  | 2.62379900  | 3.02354000  | 0.18810400  |
| C  | 1.49314100  | 4.03194200  | 0.43819600  |
| C  | 2.05787000  | 5.42297200  | 0.76074500  |
| C  | 3.46036500  | -1.08293200 | -0.00568300 |
| C  | 4.41342800  | -1.07075400 | 1.02655200  |

|   |             |             |             |
|---|-------------|-------------|-------------|
| C | 3.81072900  | -1.44045000 | -1.31834700 |
| C | 5.73679500  | -1.41504200 | 0.73350900  |
| C | 5.13004700  | -1.79649700 | -1.60996600 |
| C | 6.07496800  | -1.77568600 | -0.57696500 |
| H | 0.14215300  | -2.76739100 | 1.01334100  |
| H | -0.40782700 | -4.31812800 | 1.34539700  |
| H | -2.34530800 | -3.27509800 | -3.35091900 |
| H | -1.71589600 | -1.73410600 | -3.06365600 |
| H | -0.01321700 | 0.66398700  | -4.27326200 |
| H | -0.03796700 | -0.12931500 | -2.75831800 |
| H | -0.25647800 | -2.32902100 | -1.30178000 |
| H | 0.87721200  | -1.30513300 | -0.72532500 |
| H | 1.08756400  | 3.59474200  | 2.33800300  |
| H | 2.33528900  | 2.28971800  | 3.38757200  |
| H | 2.04864100  | 3.24777000  | 4.61232500  |
| H | -3.80112500 | 1.04702600  | 2.71991700  |
| H | -2.01598300 | 1.04345400  | 2.63023000  |
| H | -4.36503500 | 1.48025200  | -0.70271000 |
| H | -5.07255200 | 0.90204800  | 0.81707200  |
| H | -1.53481200 | 2.54086600  | 1.12105600  |
| H | -3.19402300 | 3.14729000  | 0.83167100  |
| H | -6.40675900 | -0.98679300 | 0.04206600  |
| H | -6.51113900 | -3.17238600 | -1.20492800 |
| H | -4.52555200 | -3.91414200 | -2.53190900 |
| H | -2.87873700 | 4.58463200  | -1.12601100 |
| H | -2.17982400 | 4.77188900  | -3.54220400 |
| H | -1.03538700 | 2.83744700  | -4.63346600 |
| H | -4.38418700 | -1.02644600 | 3.90701300  |
| H | -4.06701600 | -3.51362900 | 4.15814000  |
| H | -2.28354700 | -4.65388100 | 2.82790800  |
| H | 3.22928600  | 3.30922800  | -0.67998000 |
| H | 3.27135100  | 2.92193500  | 1.06829600  |
| H | 0.86889500  | 4.08091200  | -0.46486000 |
| H | 2.67807700  | 5.39158800  | 1.66690500  |
| H | 2.67286100  | 5.80210300  | -0.06852600 |
| H | 1.23415400  | 6.12811900  | 0.92908300  |
| H | 4.11636200  | -0.78397300 | 2.03173300  |
| H | 3.05676400  | -1.43142000 | -2.10357400 |
| H | 6.50233100  | -1.41452200 | 1.50486800  |
| H | 5.43557800  | -2.07760400 | -2.61414000 |

**TS-2a:**

|   |             |            |            |
|---|-------------|------------|------------|
| N | -3.11186200 | 0.66339600 | 0.93004200 |
|---|-------------|------------|------------|

|    |             |             |             |
|----|-------------|-------------|-------------|
| C  | -2.68008300 | 0.47674400  | 2.33115800  |
| C  | -4.33818300 | -0.10775100 | 0.61243800  |
| C  | -3.22833700 | 2.09208000  | 0.55235600  |
| C  | -4.07468300 | -1.50547700 | 0.07912200  |
| C  | -4.85788900 | -2.58566900 | 0.46161100  |
| C  | -4.63431400 | -3.82162200 | -0.16025700 |
| C  | -2.94194300 | -2.77640200 | -1.50219500 |
| C  | -3.68103900 | -3.92425500 | -1.15993600 |
| C  | -3.25859300 | 2.26034400  | -0.95655400 |
| C  | -4.06986100 | 3.20581000  | -1.56395900 |
| C  | -4.00080400 | 3.33929000  | -2.95958900 |
| C  | -2.36253300 | 1.57777000  | -2.99694400 |
| C  | -3.15007100 | 2.52743600  | -3.68493300 |
| C  | -2.04962200 | -0.88401900 | 2.55595500  |
| C  | -2.33329100 | -1.64271800 | 3.68038600  |
| C  | -1.63413800 | -2.84688700 | 3.85922600  |
| C  | -0.41207200 | -2.37333100 | 1.84079000  |
| C  | -0.66416900 | -3.21587700 | 2.94636900  |
| N  | -1.14334900 | -1.26251700 | 1.62611900  |
| N  | -3.10047700 | -1.60916200 | -0.85275500 |
| N  | -2.42254300 | 1.45796400  | -1.65636400 |
| N  | -1.54306600 | 0.70543100  | -3.68054100 |
| N  | 0.57779100  | -2.65812200 | 0.92165300  |
| N  | -1.99045200 | -2.79779100 | -2.52003200 |
| H  | 1.08132600  | -1.83844100 | 0.58309100  |
| H  | -2.01942000 | -3.62200800 | -3.10733400 |
| H  | -1.96360100 | -1.94175700 | -3.06771000 |
| H  | -3.51480200 | 0.63243600  | 3.02924900  |
| H  | -1.92045300 | 1.23839700  | 2.53934500  |
| H  | -4.87870100 | 0.43756900  | -0.16937500 |
| H  | -5.00020200 | -0.15616900 | 1.48682900  |
| H  | -2.33877500 | 2.59899500  | 0.94291800  |
| H  | -4.11390700 | 2.56203200  | 1.00308400  |
| H  | -5.62483200 | -2.47074400 | 1.21999800  |
| H  | -5.22044100 | -4.69085400 | 0.12296600  |
| H  | -3.51551800 | -4.85867900 | -1.68710800 |
| H  | -4.73339600 | 3.82687100  | -0.97181900 |
| H  | -4.61665900 | 4.07411000  | -3.46964300 |
| H  | -3.08167900 | 2.60575200  | -4.76549000 |
| H  | -3.07060600 | -1.30749200 | 4.40199800  |
| H  | -1.83543900 | -3.47421600 | 4.72267400  |
| H  | -0.07696700 | -4.11874700 | 3.08255100  |
| Zn | -1.41937300 | -0.05640300 | -0.32026900 |
| O  | -0.02809200 | -0.88325400 | -1.72617300 |

|   |             |             |             |
|---|-------------|-------------|-------------|
| H | -1.31276500 | 0.95871700  | -4.63109300 |
| H | -0.09216100 | -1.84915200 | -1.81612800 |
| H | -0.78422100 | 0.27844500  | -3.15504100 |
| H | 1.20333300  | -3.40705300 | 1.18875900  |
| H | 3.17825700  | 4.02591500  | -0.71485200 |
| C | 2.88604700  | 3.50528600  | 0.20027900  |
| O | 2.53915100  | 2.16341200  | -0.17811400 |
| C | 1.65794100  | 4.11186400  | 0.87441200  |
| H | 3.73846000  | 3.47011100  | 0.88980600  |
| P | 1.47311900  | 1.31121400  | 0.72129000  |
| C | 1.95827400  | 5.34563300  | 1.71367800  |
| H | 0.90650600  | 4.35177400  | 0.10913800  |
| O | 1.13585400  | 3.03689200  | 1.65829600  |
| O | 1.92493100  | 0.66978900  | 2.06366900  |
| O | 1.95702700  | -0.15333600 | -0.26797500 |
| O | 0.02237800  | 1.26393600  | 0.23564500  |
| H | 2.69411100  | 5.12529800  | 2.49403100  |
| H | 2.35816100  | 6.14570400  | 1.08084700  |
| H | 1.04642600  | 5.71819300  | 2.18974900  |
| H | 1.60398000  | 2.91321300  | 2.78862700  |
| H | 1.61403400  | 2.33858500  | 4.51368000  |
| O | 2.14122100  | 2.38460400  | 3.70642100  |
| H | 2.07796800  | 1.41561600  | 3.03015500  |
| H | 0.84797700  | -0.62984900 | -1.29310600 |
| C | 3.26955200  | -0.52304700 | -0.48505000 |
| C | 4.08985900  | -0.94412100 | 0.57186500  |
| C | 3.74793000  | -0.53484200 | -1.80257800 |
| C | 5.38528300  | -1.37970700 | 0.30553700  |
| H | 3.70817000  | -0.91023400 | 1.58541500  |
| C | 5.03851000  | -0.97714700 | -2.07229100 |
| H | 3.10525600  | -0.18301600 | -2.60380300 |
| C | 5.84166700  | -1.39527000 | -1.01184600 |
| H | 6.04374200  | -1.71009200 | 1.09979800  |
| H | 5.43355200  | -0.99776800 | -3.08054600 |
| N | 7.20463200  | -1.86767100 | -1.29233600 |
| O | 7.88908100  | -2.22989400 | -0.33655100 |
| O | 7.57374300  | -1.87376800 | -2.46618700 |

**TS-2a:**

|    |             |             |             |
|----|-------------|-------------|-------------|
| Zn | -1.42767700 | -0.10596700 | -0.32939700 |
| P  | 1.41492100  | 1.39909800  | 0.62879100  |
| N  | -3.02651200 | 0.80302000  | 0.84546600  |
| N  | -1.09188600 | -1.08030900 | 1.67486400  |
| N  | -3.08249800 | -1.64928000 | -0.63092400 |

|   |             |             |             |
|---|-------------|-------------|-------------|
| N | -2.39350300 | 1.22119000  | -1.80837200 |
| N | -1.59254100 | 0.15331000  | -3.72585200 |
| N | 0.60079200  | -2.56376400 | 1.06802900  |
| N | -1.99746700 | -3.05087900 | -2.15211700 |
| N | 7.21762500  | -1.95822900 | -1.15290800 |
| O | -0.04869500 | -1.05273000 | -1.62022400 |
| O | -0.02689800 | 1.32351600  | 0.03612400  |
| O | 1.80911400  | 0.78470500  | 2.03050400  |
| O | 1.94432500  | -0.16567300 | -0.30526800 |
| O | 2.56414900  | 2.17517800  | -0.29973300 |
| O | 1.05408200  | 3.15995100  | 1.43765700  |
| O | 2.03259200  | 2.63287800  | 3.56098100  |
| O | 7.50496700  | -2.36005400 | -2.29704800 |
| O | 8.00548100  | -1.94454700 | -0.18814800 |
| C | -2.56681900 | 0.75390700  | 2.25606800  |
| C | -4.29227800 | 0.04395800  | 0.64119300  |
| C | -3.10467800 | 2.19018600  | 0.30760200  |
| C | -4.07014100 | -1.41525500 | 0.27204600  |
| C | -4.90226800 | -2.42526400 | 0.75410500  |
| C | -4.71329300 | -3.73326200 | 0.27217800  |
| C | -3.74768300 | -3.97468000 | -0.70054100 |
| C | -2.96106200 | -2.89258400 | -1.15440400 |
| C | -3.17693100 | 2.15688300  | -1.21081600 |
| C | -3.97049600 | 3.04683500  | -1.93158700 |
| C | -3.94221000 | 2.97425700  | -3.33833500 |
| C | -3.14321800 | 2.02528900  | -3.96269500 |
| C | -2.36678700 | 1.14977400  | -3.16251600 |
| C | -1.97585900 | -0.60457800 | 2.59015600  |
| C | -2.26130900 | -1.26699700 | 3.78163800  |
| C | -1.59497300 | -2.48080700 | 4.04279000  |
| C | -0.64315100 | -2.94724400 | 3.14530200  |
| C | -0.37818500 | -2.19410500 | 1.97410000  |
| C | 2.89251400  | 3.54509100  | 0.03578100  |
| C | 1.62248100  | 4.19108500  | 0.59308800  |
| C | 1.86187600  | 5.48340400  | 1.36921600  |
| C | 3.25797400  | -0.55270700 | -0.48795900 |
| C | 4.18292000  | -0.56687500 | 0.57594000  |
| C | 3.64271600  | -0.99567400 | -1.77005800 |
| C | 5.48470400  | -1.02184500 | 0.35365300  |
| C | 4.94044600  | -1.46061800 | -1.99245400 |
| C | 5.84769700  | -1.46718200 | -0.92480900 |
| H | 1.12035900  | -1.76690600 | 0.68167400  |
| H | 1.22278800  | -3.29772500 | 1.39735700  |
| H | -2.05270200 | -3.93659000 | -2.64950600 |

|   |             |             |             |
|---|-------------|-------------|-------------|
| H | -1.95101700 | -2.25809600 | -2.79597100 |
| H | -1.37082800 | 0.26831700  | -4.71004300 |
| H | -0.81849300 | -0.19171500 | -3.14894500 |
| H | -0.10196400 | -2.02707700 | -1.52122300 |
| H | 0.83398000  | -0.71521600 | -1.21118900 |
| H | 1.96460300  | 1.62934700  | 2.97715100  |
| H | 1.46327000  | 2.63755500  | 4.34979300  |
| H | 1.51184900  | 3.10610400  | 2.58966900  |
| H | -3.38176900 | 1.00687800  | 2.95345800  |
| H | -1.77414700 | 1.50772700  | 2.35715100  |
| H | -4.82579400 | 0.51752700  | -0.19542800 |
| H | -4.93830800 | 0.11951500  | 1.52932000  |
| H | -2.17817500 | 2.69587600  | 0.61193500  |
| H | -3.96393600 | 2.74233600  | 0.72109000  |
| H | -5.67772000 | -2.20122900 | 1.48380600  |
| H | -5.33531500 | -4.54905800 | 0.63678800  |
| H | -3.60951600 | -4.96801700 | -1.12425600 |
| H | -4.59032400 | 3.77785300  | -1.41647400 |
| H | -4.54584900 | 3.65551700  | -3.93576600 |
| H | -3.10607600 | 1.94502500  | -5.04777300 |
| H | -2.97846100 | -0.85311600 | 4.48783500  |
| H | -1.80271500 | -3.03730400 | 4.95539600  |
| H | -0.07761500 | -3.85605700 | 3.34441900  |
| H | 3.24168400  | 4.01092900  | -0.89190400 |
| H | 3.70202600  | 3.54343700  | 0.77963100  |
| H | 0.90434000  | 4.35665500  | -0.22345200 |
| H | 2.56124700  | 5.32485800  | 2.20097500  |
| H | 2.28676000  | 6.24680500  | 0.70242700  |
| H | 0.91782100  | 5.87275800  | 1.77102400  |
| H | 3.86924300  | -0.22482200 | 1.55836000  |
| H | 2.92560000  | -0.95817900 | -2.58882300 |
| H | 6.21795500  | -1.04388900 | 1.15567500  |
| H | 5.26076000  | -1.80461400 | -2.97231200 |

**3a:**

|   |             |             |             |
|---|-------------|-------------|-------------|
| N | -3.15215900 | 0.65072900  | 0.89314100  |
| C | -2.76060300 | 0.46585800  | 2.30604700  |
| C | -4.35506100 | -0.14047700 | 0.53630000  |
| C | -3.28788100 | 2.07781400  | 0.51856400  |
| C | -4.05238200 | -1.53415000 | 0.01481800  |
| C | -4.82307700 | -2.62825700 | 0.38246400  |
| C | -4.56078100 | -3.86115400 | -0.23059400 |
| C | -2.85893900 | -2.78524600 | -1.53620800 |

|    |             |             |             |
|----|-------------|-------------|-------------|
| C  | -3.58279900 | -3.94716000 | -1.20739800 |
| C  | -3.27009800 | 2.25487800  | -0.98958600 |
| C  | -4.07788400 | 3.18940300  | -1.61781800 |
| C  | -3.96318800 | 3.33444000  | -3.00951100 |
| C  | -2.29232800 | 1.60263500  | -3.00220100 |
| C  | -3.07327400 | 2.54394700  | -3.71029400 |
| C  | -2.11482200 | -0.88503400 | 2.54533100  |
| C  | -2.42176500 | -1.65323500 | 3.65668600  |
| C  | -1.70839800 | -2.84697800 | 3.85213900  |
| C  | -0.43069400 | -2.34396500 | 1.87422500  |
| C  | -0.70491700 | -3.19571100 | 2.96892900  |
| N  | -1.17311800 | -1.24281600 | 1.64272300  |
| N  | -3.05535100 | -1.61971800 | -0.89409300 |
| N  | -2.39555500 | 1.47282900  | -1.66464600 |
| N  | -1.43558800 | 0.75155400  | -3.66286400 |
| N  | 0.58901900  | -2.60935700 | 0.98708900  |
| N  | -1.88483600 | -2.79154700 | -2.53144600 |
| H  | 1.08329000  | -1.78187700 | 0.64771900  |
| H  | -1.88458100 | -3.61546400 | -3.11962900 |
| H  | -1.85215200 | -1.93366400 | -3.07511600 |
| H  | -3.61860200 | 0.60519700  | 2.97906400  |
| H  | -2.02039900 | 1.23916600  | 2.53995300  |
| H  | -4.87697900 | 0.39537100  | -0.26438100 |
| H  | -5.04474100 | -0.19698900 | 1.38861900  |
| H  | -2.42489700 | 2.60295700  | 0.94284600  |
| H  | -4.19881600 | 2.52546500  | 0.94083700  |
| H  | -5.60972900 | -2.52661000 | 1.12234100  |
| H  | -5.13595100 | -4.74120500 | 0.04151500  |
| H  | -3.38609400 | -4.87948200 | -1.72756500 |
| H  | -4.77336500 | 3.79341200  | -1.04496600 |
| H  | -4.57498500 | 4.06133300  | -3.53560500 |
| H  | -2.96963500 | 2.63096400  | -4.78739400 |
| H  | -3.18718300 | -1.33380600 | 4.35583700  |
| H  | -1.92683000 | -3.48204100 | 4.70576000  |
| H  | -0.10869000 | -4.09054800 | 3.11844700  |
| Zn | -1.40249500 | -0.03501700 | -0.30736000 |
| O  | 0.01740500  | -0.83017800 | -1.67891200 |
| H  | -1.17782200 | 1.01119000  | -4.60432900 |
| H  | -0.03264300 | -1.79551900 | -1.77929000 |
| H  | -0.69716800 | 0.31652300  | -3.11413400 |
| H  | 1.21828500  | -3.35047300 | 1.26590000  |
| H  | 2.97023900  | 4.01803100  | -0.96267200 |
| C  | 2.84407000  | 3.52374300  | 0.00367900  |
| O  | 2.54148500  | 2.14153000  | -0.25252700 |



|   |            |             |             |
|---|------------|-------------|-------------|
| C | 1.66603800 | 4.06160100  | 0.81521400  |
| H | 3.77997700 | 3.57917000  | 0.57225000  |
| P | 1.45388400 | 1.45235000  | 0.77072000  |
| C | 1.98965300 | 5.27932500  | 1.66374800  |
| H | 0.82524100 | 4.28532300  | 0.14055400  |
| O | 1.30959200 | 2.94706200  | 1.63952800  |
| O | 1.92525000 | 0.64591600  | 2.08626200  |
| O | 1.93008400 | -0.15080700 | -0.17656200 |
| O | 0.00124300 | 1.31011000  | 0.30213700  |
| H | 2.81355700 | 5.06760700  | 2.35361200  |
| H | 2.28403800 | 6.11992800  | 1.02566900  |
| H | 1.11523100 | 5.59140600  | 2.24316700  |
| H | 1.70449000 | 3.00811300  | 3.61073100  |
| H | 1.70981600 | 2.37566600  | 5.05047200  |
| O | 2.14046600 | 2.35687400  | 4.18770700  |
| H | 2.01132800 | 1.20642600  | 2.89703000  |
| H | 0.88215400 | -0.57078900 | -1.19665400 |
| C | 3.22638100 | -0.52636500 | -0.43453900 |
| C | 4.06601800 | -0.98476800 | 0.59364700  |
| C | 3.68654900 | -0.51303500 | -1.76101800 |
| C | 5.35048200 | -1.43008200 | 0.29430700  |
| H | 3.70525600 | -0.97672400 | 1.61535600  |
| C | 4.96582100 | -0.96371400 | -2.06515000 |
| H | 3.03551300 | -0.13265000 | -2.54221400 |
| C | 5.78396200 | -1.41846500 | -1.03086700 |
| H | 6.01823000 | -1.78935200 | 1.06806000  |
| H | 5.34213800 | -0.96403900 | -3.08081400 |
| N | 7.13407900 | -1.89987000 | -1.34750200 |
| O | 7.83241100 | -2.29339800 | -0.41378200 |
| O | 7.48245900 | -1.88266700 | -2.52801300 |

**TS-4a:**

|   |             |             |             |
|---|-------------|-------------|-------------|
| N | -3.17075600 | 0.71217500  | 0.86736100  |
| C | -2.79969600 | 0.55136600  | 2.28850100  |
| C | -4.38384500 | -0.06615900 | 0.51403100  |
| C | -3.28333500 | 2.13304700  | 0.46316700  |
| C | -4.10097200 | -1.47414400 | 0.02181900  |
| C | -4.88856600 | -2.54984500 | 0.40691600  |
| C | -4.64139200 | -3.79729900 | -0.18331500 |
| C | -2.92022800 | -2.76917600 | -1.50251000 |
| C | -3.66175400 | -3.91500200 | -1.15484800 |
| C | -3.22949500 | 2.28237300  | -1.04706000 |
| C | -4.01207900 | 3.21367000  | -1.71056300 |

|    |             |             |             |
|----|-------------|-------------|-------------|
| C  | -3.86229200 | 3.33234700  | -3.10181500 |
| C  | -2.21171300 | 1.58173000  | -3.02435500 |
| C  | -2.96533500 | 2.52004200  | -3.76700500 |
| C  | -2.18054200 | -0.80464900 | 2.56361300  |
| C  | -2.51921300 | -1.54348200 | 3.68485200  |
| C  | -1.83188300 | -2.74715500 | 3.91471300  |
| C  | -0.51430600 | -2.30897300 | 1.94478700  |
| C  | -0.82425200 | -3.13278700 | 3.05384300  |
| N  | -1.23179700 | -1.19602900 | 1.68131900  |
| N  | -3.10271400 | -1.58978300 | -0.88188100 |
| N  | -2.34736100 | 1.47945900  | -1.68646400 |
| N  | -1.35183700 | 0.70951900  | -3.64744600 |
| N  | 0.50977400  | -2.61570700 | 1.08438900  |
| N  | -1.94414200 | -2.80670700 | -2.49259400 |
| H  | 1.02207000  | -1.81350000 | 0.70139800  |
| H  | -1.95148500 | -3.63713700 | -3.07099800 |
| H  | -1.87995400 | -1.95350600 | -3.04011900 |
| H  | -3.66317900 | 0.71921800  | 2.94782000  |
| H  | -2.04995800 | 1.31756800  | 2.51503100  |
| H  | -4.88900700 | 0.46323800  | -0.30156700 |
| H  | -5.08164800 | -0.09415200 | 1.36112100  |
| H  | -2.42595800 | 2.65865900  | 0.89785100  |
| H  | -4.19885500 | 2.59738100  | 0.85658100  |
| H  | -5.67592500 | -2.42385700 | 1.14225900  |
| H  | -5.22958000 | -4.66421800 | 0.10282300  |
| H  | -3.47600500 | -4.85954400 | -1.65665900 |
| H  | -4.71488500 | 3.83487600  | -1.16569700 |
| H  | -4.45378700 | 4.05567800  | -3.65538600 |
| H  | -2.83645300 | 2.58549700  | -4.84292700 |
| H  | -3.28882400 | -1.19538000 | 4.36548100  |
| H  | -2.07575600 | -3.36098200 | 4.77700300  |
| H  | -0.24926500 | -4.03702500 | 3.22813400  |
| Zn | -1.41359100 | -0.03453900 | -0.29723400 |
| O  | -0.00369600 | -0.84650000 | -1.61570700 |
| H  | -1.06783400 | 0.94276900  | -4.58796300 |
| H  | -0.09332400 | -1.80662100 | -1.73134300 |
| H  | -0.64669500 | 0.25187700  | -3.07019100 |
| H  | 1.11483500  | -3.36955600 | 1.38063000  |
| H  | 3.11963800  | 3.84329400  | -1.06019700 |
| C  | 2.95278400  | 3.41119100  | -0.07120100 |
| O  | 2.50889900  | 2.05144600  | -0.26466000 |
| C  | 1.83921000  | 4.10466900  | 0.71528000  |
| H  | 3.89406700  | 3.39607300  | 0.49022700  |
| P  | 1.41305100  | 1.55221900  | 0.83426700  |

|   |             |             |             |
|---|-------------|-------------|-------------|
| C | 2.28665500  | 5.31562900  | 1.51335300  |
| H | 1.02000900  | 4.38033300  | 0.03577900  |
| O | 1.36524800  | 3.06623900  | 1.59698600  |
| O | 1.90348800  | 0.72527300  | 2.11053100  |
| O | 1.88717300  | -0.33150900 | -0.15750700 |
| O | -0.01457400 | 1.34609800  | 0.36284400  |
| H | 3.08970100  | 5.05174400  | 2.20955900  |
| H | 2.66046500  | 6.09412800  | 0.83939700  |
| H | 1.45014100  | 5.73755000  | 2.07835700  |
| H | 1.96472900  | 3.15645600  | 3.65956000  |
| H | 2.25351200  | 2.43978200  | 5.02670900  |
| O | 2.47593300  | 2.45155000  | 4.08770600  |
| H | 2.12857400  | 1.29672900  | 2.89197700  |
| H | 0.90546600  | -0.62608700 | -1.09504300 |
| C | 3.16174600  | -0.70201100 | -0.43846100 |
| C | 4.03474100  | -1.09905800 | 0.59339600  |
| C | 3.61553100  | -0.72878200 | -1.77158200 |
| C | 5.32644200  | -1.52007300 | 0.29796300  |
| H | 3.68421100  | -1.06443000 | 1.61897300  |
| C | 4.90318800  | -1.15478800 | -2.07192700 |
| H | 2.94707000  | -0.40119200 | -2.56241900 |
| C | 5.74775100  | -1.54732300 | -1.03215100 |
| H | 6.01201500  | -1.83137500 | 1.07701600  |
| H | 5.26814700  | -1.18471900 | -3.09144500 |
| N | 7.10499500  | -1.99891900 | -1.34516100 |
| O | 7.82652400  | -2.33684100 | -0.40575700 |
| O | 7.44346600  | -2.01536700 | -2.52968800 |

**1a':**

|   |            |             |             |
|---|------------|-------------|-------------|
| N | 2.92892700 | 0.85463800  | -1.04370900 |
| C | 2.92453200 | 0.19180900  | -2.36503000 |
| C | 4.23057900 | 0.71966600  | -0.34620000 |
| C | 2.45451900 | 2.25982200  | -1.11188700 |
| C | 4.31495200 | -0.45918600 | 0.61291400  |
| C | 5.49613700 | -1.16979200 | 0.77689000  |
| C | 5.54396700 | -2.16297100 | 1.76428800  |
| C | 3.28846900 | -1.60487400 | 2.36173200  |
| C | 4.44243200 | -2.37959600 | 2.57683600  |
| C | 2.06730300 | 2.77389900  | 0.26255800  |
| C | 2.33191900 | 4.08003200  | 0.65038400  |
| C | 1.89836500 | 4.49780500  | 1.91698100  |
| C | 1.00873800 | 2.29563500  | 2.28204800  |
| C | 1.23431500 | 3.60807100  | 2.74346700  |

|    |             |             |             |
|----|-------------|-------------|-------------|
| C  | 2.92710600  | -1.31885500 | -2.23908600 |
| C  | 3.71647400  | -2.11769000 | -3.05331300 |
| C  | 3.59084200  | -3.50973100 | -2.93970400 |
| C  | 1.89325600  | -3.16165300 | -1.27584600 |
| C  | 2.67093700  | -4.04294600 | -2.05451300 |
| N  | 2.06077600  | -1.82940100 | -1.33465100 |
| N  | 3.21530100  | -0.70848600 | 1.36075100  |
| N  | 1.42250300  | 1.89634100  | 1.06574100  |
| N  | 0.39802500  | 1.34603600  | 3.08585000  |
| N  | 0.93422100  | -3.63341500 | -0.39225600 |
| N  | 2.15485000  | -1.73386500 | 3.16380600  |
| H  | 0.12563000  | -3.03016800 | -0.30800000 |
| H  | 2.30414500  | -2.27496700 | 4.00686100  |
| H  | 1.70470300  | -0.84283300 | 3.36488300  |
| H  | 3.77163900  | 0.52489900  | -2.98120500 |
| H  | 1.99918600  | 0.48664600  | -2.87201400 |
| H  | 4.38522900  | 1.62617700  | 0.25029900  |
| H  | 5.05385600  | 0.67156900  | -1.07033000 |
| H  | 1.56196800  | 2.28102000  | -1.74875200 |
| H  | 3.20898800  | 2.91915900  | -1.56291600 |
| H  | 6.35965300  | -0.95555500 | 0.15639200  |
| H  | 6.44873000  | -2.74560900 | 1.91006000  |
| H  | 4.46880000  | -3.11178600 | 3.37774200  |
| H  | 2.85667600  | 4.75626100  | -0.01583400 |
| H  | 2.08377600  | 5.51449300  | 2.25070700  |
| H  | 0.88957100  | 3.90428600  | 3.72925700  |
| H  | 4.40205100  | -1.67119700 | -3.76549300 |
| H  | 4.19577400  | -4.16712200 | -3.55716000 |
| H  | 2.52500200  | -5.11547500 | -1.97137800 |
| Zn | 1.37229100  | -0.16054700 | 0.14377800  |
| O  | -0.09354800 | -1.13565100 | 1.46177400  |
| H  | -0.12019400 | 1.71650100  | 3.87163400  |
| H  | 0.15694800  | -1.93917400 | 1.94424500  |
| H  | -0.09665000 | 0.61160600  | 2.58798600  |
| H  | 0.67918900  | -4.60512700 | -0.51114000 |
| H  | -3.05309300 | 3.43645800  | 0.22314000  |
| C  | -2.60940300 | 2.94020400  | -0.64440200 |
| O  | -1.94897800 | 1.76251600  | -0.12729100 |
| C  | -1.63406100 | 3.88640800  | -1.35198100 |
| H  | -3.41003200 | 2.63535500  | -1.32660800 |
| P  | -1.66060900 | 0.50360200  | -1.12193300 |
| C  | -2.37900500 | 5.08902600  | -1.93515400 |
| H  | -0.89215100 | 4.23365100  | -0.62264400 |
| O  | -0.86450000 | 3.20349400  | -2.34527300 |

|   |             |             |             |
|---|-------------|-------------|-------------|
| O | -2.39405000 | 0.62184300  | -2.41463200 |
| O | -2.26153100 | -0.75421500 | -0.15068600 |
| O | -0.17544500 | 0.17171000  | -1.08850200 |
| H | -3.12225700 | 4.76909800  | -2.67454000 |
| H | -2.89692400 | 5.65577000  | -1.15274400 |
| H | -1.67166300 | 5.75761500  | -2.43297700 |
| H | -1.44940500 | 2.64396500  | -2.88412700 |
| H | -0.96348600 | -1.22123100 | 1.00163000  |
| C | -3.62461700 | -0.96064500 | 0.04883800  |
| C | -4.47468600 | -1.22445500 | -1.03000100 |
| C | -4.09898500 | -0.95742900 | 1.36365300  |
| C | -5.81864300 | -1.49176000 | -0.78221500 |
| H | -4.08336800 | -1.20243000 | -2.04028100 |
| C | -5.44067000 | -1.23203300 | 1.61235800  |
| H | -3.41908000 | -0.73525800 | 2.18046600  |
| C | -6.28151000 | -1.49540300 | 0.53298200  |
| H | -6.50840200 | -1.70163800 | -1.59054600 |
| H | -5.84335900 | -1.24064800 | 2.61759500  |
| N | -7.70075500 | -1.78809400 | 0.79278500  |
| O | -8.41932900 | -2.01691500 | -0.17753000 |
| O | -8.07356200 | -1.78632400 | 1.96509700  |

**TS-2a':**

|   |             |             |             |
|---|-------------|-------------|-------------|
| N | -2.93737200 | 0.78882800  | 1.02148300  |
| C | -2.38438800 | 0.56631400  | 2.37576200  |
| C | -4.22090700 | 0.07781600  | 0.80811200  |
| C | -3.01240300 | 2.22603900  | 0.66385800  |
| C | -4.07709700 | -1.30574200 | 0.19289800  |
| C | -4.90164800 | -2.35441100 | 0.57581200  |
| C | -4.79638300 | -3.56984000 | -0.11405700 |
| C | -3.12527000 | -2.56909500 | -1.51514400 |
| C | -3.91543000 | -3.68320200 | -1.17716400 |
| C | -3.16592300 | 2.40908900  | -0.83604600 |
| C | -3.98604900 | 3.39228200  | -1.36898400 |
| C | -4.04026200 | 3.52684000  | -2.76416600 |
| C | -2.48880000 | 1.70050400  | -2.95101600 |
| C | -3.29468300 | 2.68132500  | -3.56550300 |
| C | -1.82408200 | -0.83435600 | 2.52914900  |
| C | -2.04590400 | -1.59041200 | 3.67056300  |
| C | -1.41981000 | -2.84081600 | 3.77082100  |
| C | -0.37168400 | -2.42192000 | 1.64935200  |
| C | -0.57013500 | -3.26206400 | 2.76284600  |
| N | -1.04165900 | -1.26373200 | 1.51263800  |

|    |             |             |             |
|----|-------------|-------------|-------------|
| N  | -3.17107100 | -1.42695500 | -0.80465900 |
| N  | -2.43466900 | 1.57561100  | -1.61231600 |
| N  | -1.76314600 | 0.79338000  | -3.70395700 |
| N  | 0.51391700  | -2.75546900 | 0.63118700  |
| N  | -2.23629100 | -2.59767700 | -2.58662700 |
| H  | 1.08328600  | -1.96944800 | 0.32917000  |
| H  | -2.34762400 | -3.39259200 | -3.20375000 |
| H  | -2.19071300 | -1.72102800 | -3.10125500 |
| H  | -3.13990400 | 0.76186300  | 3.14961600  |
| H  | -1.56268300 | 1.27867600  | 2.51734300  |
| H  | -4.82172100 | 0.67563100  | 0.11294600  |
| H  | -4.78809800 | 0.01326500  | 1.74553900  |
| H  | -2.06795900 | 2.68213400  | 0.98070100  |
| H  | -3.83138700 | 2.73393100  | 1.19206000  |
| H  | -5.61080500 | -2.23049900 | 1.38717300  |
| H  | -5.41840600 | -4.41416900 | 0.16795000  |
| H  | -3.84354800 | -4.59971700 | -1.75436000 |
| H  | -4.56392700 | 4.04064300  | -0.71914500 |
| H  | -4.66733700 | 4.28980200  | -3.21580400 |
| H  | -3.32070300 | 2.76279200  | -4.64764200 |
| H  | -2.68224300 | -1.21497300 | 4.46477000  |
| H  | -1.57744400 | -3.46431300 | 4.64595600  |
| H  | -0.03259400 | -4.20237300 | 2.83622500  |
| Zn | -1.42549200 | -0.01018700 | -0.37942200 |
| O  | -0.06148900 | -0.83368900 | -1.86702300 |
| H  | -1.61398100 | 1.04860000  | -4.67096000 |
| H  | -0.12671800 | -1.79863700 | -1.96147600 |
| H  | -0.94386300 | 0.39455400  | -3.25366800 |
| H  | 1.08878400  | -3.56415800 | 0.83318700  |
| H  | 3.44122800  | 4.05866700  | 0.84679900  |
| C  | 2.98808700  | 3.20296000  | 1.35106800  |
| O  | 2.53487100  | 2.31692600  | 0.29686600  |
| C  | 1.78659000  | 3.58585500  | 2.23267900  |
| H  | 3.75431800  | 2.67536600  | 1.93187800  |
| P  | 1.48320900  | 1.15336300  | 0.66963700  |
| C  | 2.22739100  | 4.11393900  | 3.59497100  |
| H  | 1.20767500  | 4.36479200  | 1.71153000  |
| O  | 0.97142000  | 2.43683100  | 2.32791100  |
| O  | 1.79581600  | 0.34256300  | 1.98853200  |
| O  | 2.09592100  | 0.00682300  | -0.47721200 |
| O  | 0.09065500  | 1.27192500  | 0.06798900  |
| H  | 2.78895400  | 3.34974500  | 4.14418000  |
| H  | 2.86300800  | 5.00129700  | 3.48926300  |
| H  | 1.35362400  | 4.39077900  | 4.19159200  |

|   |            |             |             |
|---|------------|-------------|-------------|
| H | 1.49055400 | 1.27814200  | 2.60165800  |
| H | 0.83541100 | -0.58361900 | -1.52880800 |
| C | 3.44620900 | -0.28803700 | -0.62979400 |
| C | 4.17388200 | -0.90306500 | 0.39579600  |
| C | 4.03674200 | -0.00851200 | -1.86622900 |
| C | 5.50691800 | -1.24298200 | 0.17541400  |
| H | 3.69924000 | -1.09286300 | 1.35177300  |
| C | 5.36622900 | -0.35295300 | -2.08980100 |
| H | 3.45178400 | 0.48451000  | -2.63609600 |
| C | 6.08264900 | -0.96671200 | -1.06335400 |
| H | 6.10304000 | -1.71908100 | 0.94440900  |
| H | 5.85448700 | -0.15023000 | -3.03501300 |
| N | 7.48848300 | -1.33607100 | -1.29629600 |
| O | 8.09315100 | -1.87582100 | -0.37171900 |
| O | 7.96497000 | -1.08315900 | -2.40119900 |

**3a':**

|   |             |             |             |
|---|-------------|-------------|-------------|
| N | -3.11890400 | 0.54219600  | 1.01462600  |
| C | -2.76047400 | 0.13709600  | 2.39017000  |
| C | -4.31417900 | -0.17781500 | 0.51178600  |
| C | -3.24356000 | 2.01127900  | 0.86415900  |
| C | -4.00221200 | -1.47432300 | -0.21565100 |
| C | -4.78912100 | -2.60515900 | -0.04606400 |
| C | -4.51490000 | -3.72997800 | -0.83578000 |
| C | -2.76991200 | -2.48015100 | -1.90885300 |
| C | -3.50880800 | -3.67181900 | -1.78601000 |
| C | -3.19862800 | 2.41889800  | -0.59790100 |
| C | -3.99040000 | 3.44607100  | -1.08682700 |
| C | -3.85556200 | 3.80006800  | -2.43845100 |
| C | -2.19609000 | 2.07327600  | -2.67318400 |
| C | -2.96122600 | 3.11689500  | -3.23995100 |
| C | -2.11458600 | -1.23449000 | 2.42847400  |
| C | -2.43970900 | -2.16808700 | 3.39983200  |
| C | -1.72818800 | -3.37815300 | 3.41772700  |
| C | -0.41537000 | -2.57165200 | 1.56857200  |
| C | -0.70771600 | -3.58491500 | 2.50874800  |
| N | -1.15471100 | -1.44712600 | 1.49965400  |
| N | -2.97971900 | -1.42678100 | -1.09902700 |
| N | -2.31986200 | 1.74139100  | -1.37302600 |
| N | -1.33254000 | 1.32628800  | -3.44438000 |
| N | 0.62340900  | -2.69268600 | 0.66859700  |
| N | -1.76613300 | -2.34046800 | -2.86554200 |
| H | 1.12748300  | -1.82310600 | 0.48905300  |

|    |             |             |             |
|----|-------------|-------------|-------------|
| H  | -1.75035800 | -3.06868200 | -3.56879400 |
| H  | -1.72692500 | -1.41302600 | -3.27955600 |
| H  | -3.63521800 | 0.16758500  | 3.05516000  |
| H  | -2.03080000 | 0.86477000  | 2.76254600  |
| H  | -4.81952800 | 0.47912300  | -0.20505100 |
| H  | -5.02274100 | -0.36567500 | 1.32918800  |
| H  | -2.38717400 | 2.45874900  | 1.38080300  |
| H  | -4.16085000 | 2.39264800  | 1.33479900  |
| H  | -5.59640200 | -2.61227600 | 0.67839500  |
| H  | -5.10262700 | -4.63593300 | -0.72112700 |
| H  | -3.30226800 | -4.51319800 | -2.44008100 |
| H  | -4.68943400 | 3.96169600  | -0.43716900 |
| H  | -4.45456300 | 4.60404900  | -2.85580100 |
| H  | -2.84156400 | 3.36625100  | -4.28970400 |
| H  | -3.21822300 | -1.96166200 | 4.12648700  |
| H  | -1.96099700 | -4.13931900 | 4.15668600  |
| H  | -0.11293200 | -4.49291700 | 2.52727600  |
| Zn | -1.35274600 | 0.04521800  | -0.24688400 |
| O  | 0.11542400  | -0.53001000 | -1.68633600 |
| H  | -1.06069500 | 1.72845500  | -4.33036600 |
| H  | 0.07559300  | -1.47160200 | -1.92452200 |
| H  | -0.59576000 | 0.82228400  | -2.95660600 |
| H  | 1.24568700  | -3.47214600 | 0.83687200  |
| H  | 2.99304800  | 4.22729600  | 0.04286800  |
| C  | 2.86279700  | 3.52672400  | 0.87104500  |
| O  | 2.57590200  | 2.23369800  | 0.30512500  |
| C  | 1.67305400  | 3.86212100  | 1.77505600  |
| H  | 3.79472700  | 3.45562700  | 1.44425700  |
| P  | 1.46705200  | 1.34157800  | 1.12787700  |
| C  | 1.99090300  | 4.82572900  | 2.90471300  |
| H  | 0.84751400  | 4.25933900  | 1.16343400  |
| O  | 1.28999400  | 2.58822000  | 2.29331700  |
| O  | 1.89618900  | 0.30339400  | 2.32314100  |
| O  | 2.00203900  | -0.05009400 | -0.03227600 |
| O  | 0.03360400  | 1.27824800  | 0.59078500  |
| H  | 2.79463900  | 4.43287400  | 3.53580100  |
| H  | 2.30524200  | 5.79477900  | 2.50121400  |
| H  | 1.10847800  | 4.98828500  | 3.52997700  |
| H  | 1.88813100  | 0.80224800  | 3.15634200  |
| H  | 0.96178100  | -0.33837700 | -1.16006900 |
| C  | 3.31675000  | -0.35594800 | -0.30550600 |
| C  | 4.11080000  | -1.02906200 | 0.63570900  |
| C  | 3.83687600  | -0.04767700 | -1.57154300 |
| C  | 5.41424900  | -1.39447400 | 0.30935300  |



|   |            |             |             |
|---|------------|-------------|-------------|
| H | 3.70174500 | -1.24924700 | 1.61489100  |
| C | 5.13595500 | -0.41531300 | -1.90378000 |
| H | 3.21776100 | 0.49451300  | -2.27937600 |
| C | 5.90954500 | -1.08592600 | -0.95647700 |
| H | 6.04933800 | -1.91582100 | 1.01532900  |
| H | 5.56057000 | -0.18854600 | -2.87409300 |
| N | 7.28150300 | -1.48022900 | -1.30363700 |
| O | 7.93734000 | -2.07201200 | -0.44712400 |
| O | 7.68711900 | -1.19602600 | -2.43009900 |

**1a":**

|   |             |             |             |
|---|-------------|-------------|-------------|
| N | -2.89223000 | 0.15066500  | -1.77813300 |
| C | -2.18617100 | 1.23000600  | -2.50971100 |
| C | -4.25782800 | 0.56607300  | -1.38643900 |
| C | -2.87568300 | -1.14985500 | -2.48252700 |
| C | -4.75491300 | -0.06389300 | -0.10091700 |
| C | -6.09409700 | -0.39092400 | 0.03417200  |
| C | -6.54698500 | -0.84010200 | 1.28441900  |
| C | -4.29888500 | -0.60076400 | 2.11510300  |
| C | -5.65594500 | -0.94042800 | 2.33160500  |
| C | -2.81433700 | -2.33842400 | -1.53567400 |
| C | -3.54344300 | -3.50174400 | -1.74764900 |
| C | -3.33228100 | -4.58365000 | -0.88371800 |
| C | -1.66605300 | -3.28609700 | 0.24979600  |
| C | -2.37400800 | -4.49060700 | 0.11713400  |
| C | -1.90659400 | 2.42130400  | -1.60656500 |
| C | -1.83614300 | 3.70167200  | -2.12618000 |
| C | -1.47879000 | 4.75059600  | -1.26162600 |
| C | -1.34998200 | 3.15772500  | 0.53957300  |
| C | -1.23458600 | 4.48771700  | 0.07082400  |
| N | -1.67261300 | 2.14907800  | -0.29711000 |
| N | -3.85514700 | -0.18258000 | 0.90776900  |
| N | -1.93262400 | -2.22213900 | -0.52159200 |
| N | -0.64018500 | -3.10885800 | 1.19865000  |
| N | -1.17784700 | 2.87887200  | 1.87106400  |
| N | -3.39265700 | -0.72604400 | 3.13256600  |
| H | -0.51528200 | 3.47335900  | 2.35408800  |
| H | -2.48754500 | -0.28241800 | 3.03901500  |
| H | -3.74676000 | -0.83192500 | 4.07095400  |
| H | -2.74945900 | 1.55683300  | -3.39535300 |
| H | -1.22871500 | 0.81909800  | -2.84798400 |
| H | -4.96846400 | 0.36881900  | -2.20067200 |
| H | -4.23882300 | 1.65059500  | -1.23466600 |

|    |             |             |             |
|----|-------------|-------------|-------------|
| H  | -1.96875500 | -1.18136400 | -3.09671200 |
| H  | -3.73450000 | -1.24546900 | -3.16020800 |
| H  | -6.77423300 | -0.28247800 | -0.80377300 |
| H  | -7.59120500 | -1.10084100 | 1.42930900  |
| H  | -5.97423400 | -1.27591500 | 3.31372200  |
| H  | -4.25381600 | -3.56789200 | -2.56495800 |
| H  | -3.89398800 | -5.50396000 | -1.01281700 |
| H  | -2.15322700 | -5.33357500 | 0.76436100  |
| H  | -2.04063800 | 3.88302400  | -3.17588500 |
| H  | -1.40448000 | 5.76672000  | -1.63763400 |
| H  | -0.97308100 | 5.27748800  | 0.76716000  |
| Zn | -1.67251200 | -0.03842000 | 0.06250300  |
| O  | -0.76996000 | -0.32393500 | 2.01257400  |
| H  | -0.42812000 | -3.95181200 | 1.72169300  |
| H  | -0.76680300 | -1.29886700 | 2.12701600  |
| H  | 0.20779100  | -2.74787300 | 0.76464600  |
| H  | -1.09319100 | 1.90495200  | 2.12892900  |
| H  | 3.88698000  | 2.63372500  | -1.15601200 |
| C  | 3.25830400  | 2.31426400  | -0.32197700 |
| O  | 2.25353400  | 1.44752700  | -0.92748600 |
| C  | 2.63072500  | 3.52883900  | 0.35605900  |
| H  | 3.87114400  | 1.75018900  | 0.38780500  |
| P  | 1.59295300  | 0.17984500  | -0.19581200 |
| C  | 3.69796400  | 4.57208600  | 0.68451300  |
| H  | 1.90360200  | 3.95967400  | -0.34926900 |
| O  | 1.94041300  | 3.18681700  | 1.56322300  |
| O  | 1.61002900  | 0.37346900  | 1.32404700  |
| O  | 2.51593500  | -1.10855400 | -0.61446600 |
| O  | 0.24274800  | -0.11791600 | -0.82265800 |
| H  | 4.48152000  | 4.14461200  | 1.31945100  |
| H  | 4.15730800  | 4.97270000  | -0.22567100 |
| H  | 3.24043100  | 5.40040200  | 1.23217000  |
| H  | 1.84307000  | 2.21795400  | 1.62866700  |
| H  | 0.20603100  | -0.05760100 | 1.89078900  |
| C  | 3.88568700  | -1.19870300 | -0.38934300 |
| C  | 4.41551000  | -1.15906400 | 0.90514100  |
| C  | 4.70290600  | -1.39929700 | -1.50498300 |
| C  | 5.78871100  | -1.31591300 | 1.08069700  |
| H  | 3.75904700  | -1.00209800 | 1.75370600  |
| C  | 6.07432600  | -1.56124300 | -1.32882800 |
| H  | 4.25543000  | -1.43244000 | -2.49270900 |
| C  | 6.59717800  | -1.51457700 | -0.03723400 |
| H  | 6.23829900  | -1.29215900 | 2.06587000  |
| H  | 6.73909600  | -1.72135800 | -2.16873900 |

|   |            |             |             |
|---|------------|-------------|-------------|
| N | 8.04771500 | -1.68558600 | 0.15258200  |
| O | 8.47724200 | -1.63674600 | 1.30345700  |
| O | 8.73233900 | -1.86553600 | -0.85228600 |

**TS-2a”:**

|   |             |             |             |
|---|-------------|-------------|-------------|
| N | -2.75744100 | -0.20751000 | -1.87249500 |
| C | -2.20811900 | 0.87842100  | -2.71924900 |
| C | -4.21253500 | -0.03274400 | -1.65327200 |
| C | -2.41631700 | -1.55862500 | -2.36765700 |
| C | -4.70285300 | -0.45519300 | -0.28183600 |
| C | -5.96217100 | -1.01038900 | -0.12724000 |
| C | -6.43273400 | -1.23099700 | 1.17807600  |
| C | -4.37028700 | -0.31563600 | 2.01721400  |
| C | -5.64881400 | -0.87714400 | 2.25611700  |
| C | -2.37833600 | -2.59657100 | -1.26012800 |
| C | -2.95027100 | -3.85136600 | -1.40868300 |
| C | -2.77592200 | -4.78522000 | -0.37692800 |
| C | -1.45043100 | -3.16042900 | 0.79610300  |
| C | -2.01346300 | -4.45107800 | 0.72885300  |
| C | -2.18112400 | 2.20131700  | -1.97057200 |
| C | -2.43289900 | 3.40548200  | -2.60849800 |
| C | -2.32142000 | 4.58806700  | -1.86006600 |
| C | -1.72849200 | 3.26575000  | 0.05792500  |
| C | -1.96646100 | 4.52953600  | -0.52512700 |
| N | -1.85462500 | 2.13253400  | -0.65880500 |
| N | -3.89790500 | -0.14481200 | 0.76189600  |
| N | -1.67942200 | -2.24199000 | -0.15857000 |
| N | -0.65066300 | -2.77211200 | 1.86385900  |
| N | -1.29907200 | 3.14847400  | 1.36151900  |
| N | -3.58468700 | 0.09598500  | 3.05046800  |
| H | -1.45899800 | 3.93293400  | 1.97801500  |
| H | -2.65391500 | 0.45287500  | 2.86614500  |
| H | -3.86824000 | -0.06964200 | 4.00198600  |
| H | -2.77127100 | 0.98722600  | -3.65695500 |
| H | -1.17791700 | 0.60542500  | -2.96934600 |
| H | -4.78415600 | -0.54992200 | -2.43583800 |
| H | -4.43149500 | 1.03649900  | -1.75443100 |
| H | -1.41088200 | -1.50273600 | -2.79859000 |
| H | -3.10531200 | -1.87653800 | -3.16244600 |
| H | -6.57114900 | -1.25008800 | -0.99219300 |
| H | -7.41397800 | -1.66766900 | 1.33970500  |
| H | -5.99497700 | -1.01393300 | 3.27588300  |
| H | -3.50984300 | -4.10140000 | -2.30367500 |

|    |             |             |             |
|----|-------------|-------------|-------------|
| H  | -3.21677200 | -5.77472800 | -0.45383100 |
| H  | -1.82726200 | -5.16890900 | 1.52177500  |
| H  | -2.70575400 | 3.42834000  | -3.65803300 |
| H  | -2.51326500 | 5.54930700  | -2.32752400 |
| H  | -1.86378600 | 5.43017100  | 0.07199700  |
| Zn | -1.68350700 | 0.05365300  | 0.07134000  |
| O  | -0.85614200 | 0.33191200  | 1.93415900  |
| H  | -0.36994000 | -3.52305600 | 2.48126800  |
| H  | -0.97257900 | -0.46756800 | 2.47024900  |
| H  | 0.12869900  | -2.17028500 | 1.61538500  |
| H  | -1.31617700 | 2.22632000  | 1.80101900  |
| H  | 4.05353700  | 2.49515700  | -0.31400200 |
| C  | 3.24868900  | 2.17928000  | 0.35450500  |
| O  | 2.25003600  | 1.54870300  | -0.50666600 |
| C  | 2.63980100  | 3.36836200  | 1.09165300  |
| H  | 3.63074100  | 1.45545500  | 1.07759800  |
| P  | 1.58648600  | 0.12259500  | -0.24883800 |
| C  | 3.71544600  | 4.09833000  | 1.89364800  |
| H  | 2.20767100  | 4.05209800  | 0.34607500  |
| O  | 1.63115500  | 2.92310500  | 1.99428800  |
| O  | 1.50148900  | -0.15450600 | 1.29650700  |
| O  | 2.59446500  | -0.98829400 | -0.85263400 |
| O  | 0.27103800  | -0.00115300 | -0.96463000 |
| H  | 4.15142500  | 3.43210600  | 2.64552700  |
| H  | 4.51649200  | 4.46900900  | 1.24563400  |
| H  | 3.27101000  | 4.94900200  | 2.41623500  |
| H  | 0.76091300  | 2.93063700  | 1.56369100  |
| H  | 0.55476400  | 0.18566000  | 1.67459400  |
| C  | 3.97084500  | -1.03548200 | -0.62612400 |
| C  | 4.47066700  | -1.39451800 | 0.62831900  |
| C  | 4.81502700  | -0.78102500 | -1.70826100 |
| C  | 5.84948200  | -1.48665000 | 0.80532600  |
| H  | 3.78801700  | -1.59434300 | 1.44687700  |
| C  | 6.19342600  | -0.87743000 | -1.53222400 |
| H  | 4.38826700  | -0.52018300 | -2.67094000 |
| C  | 6.68862800  | -1.22467100 | -0.27636800 |
| H  | 6.28034400  | -1.76089500 | 1.76044200  |
| H  | 6.88334500  | -0.69079300 | -2.34599200 |
| N  | 8.14745700  | -1.32459500 | -0.08725800 |
| O  | 8.55157900  | -1.63336100 | 1.03146600  |
| O  | 8.85997000  | -1.08917200 | -1.06014900 |

**3a”:**

|    |             |             |             |
|----|-------------|-------------|-------------|
| N  | -2.43762600 | -0.25010400 | -1.99508700 |
| C  | -1.75087100 | 0.78197800  | -2.80709500 |
| C  | -3.90714000 | -0.06948000 | -2.03230700 |
| C  | -2.03282300 | -1.62818000 | -2.34300500 |
| C  | -4.61875700 | -0.41655800 | -0.73979800 |
| C  | -5.88595400 | -0.97553200 | -0.76208100 |
| C  | -6.56379800 | -1.12454800 | 0.45948400  |
| C  | -4.66525500 | -0.14426800 | 1.57067700  |
| C  | -5.96706600 | -0.70161000 | 1.62863100  |
| C  | -2.17568400 | -2.59040600 | -1.17699200 |
| C  | -2.73851200 | -3.85056500 | -1.32058500 |
| C  | -2.73781600 | -4.70725600 | -0.21063000 |
| C  | -1.56409700 | -3.01654300 | 1.02628800  |
| C  | -2.13828600 | -4.30158000 | 0.97041300  |
| C  | -1.84799100 | 2.14866600  | -2.14926300 |
| C  | -2.00910800 | 3.30076700  | -2.90097900 |
| C  | -2.04719200 | 4.53260800  | -2.22625400 |
| C  | -1.77821100 | 3.34939200  | -0.14724100 |
| C  | -1.93252800 | 4.56732700  | -0.85129600 |
| N  | -1.74167900 | 2.16831200  | -0.79876800 |
| N  | -3.99566800 | -0.03852300 | 0.39986000  |
| N  | -1.64402900 | -2.16482000 | -0.00973300 |
| N  | -0.89677400 | -2.55411700 | 2.15769800  |
| N  | -1.62623600 | 3.33401600  | 1.21213300  |
| N  | -4.05516400 | 0.33215300  | 2.69051900  |
| H  | -1.89283600 | 4.15535800  | 1.73251400  |
| H  | -3.08301600 | 0.63242500  | 2.63489300  |
| H  | -4.47386200 | 0.17836300  | 3.59326800  |
| H  | -2.15417500 | 0.82920100  | -3.82877200 |
| H  | -0.69648200 | 0.49716200  | -2.86949100 |
| H  | -4.34306800 | -0.63293700 | -2.86882000 |
| H  | -4.10026000 | 0.99114500  | -2.22960900 |
| H  | -0.97206600 | -1.59794400 | -2.61266000 |
| H  | -2.59105900 | -2.00059200 | -3.21339300 |
| H  | -6.34436200 | -1.27108200 | -1.69966200 |
| H  | -7.55826900 | -1.56075600 | 0.48379000  |
| H  | -6.47530900 | -0.78348200 | 2.58446100  |
| H  | -3.16339300 | -4.16119400 | -2.26908200 |
| H  | -3.18151600 | -5.69592100 | -0.28244400 |
| H  | -2.08062900 | -4.96354500 | 1.82895300  |
| H  | -2.10364300 | 3.24755000  | -3.98017200 |
| H  | -2.17180400 | 5.45648600  | -2.78349600 |
| H  | -1.95740300 | 5.50589000  | -0.30634800 |
| Zn | -1.67621100 | 0.13324100  | 0.09672000  |

|   |             |             |             |
|---|-------------|-------------|-------------|
| O | -1.23610000 | 0.55839600  | 2.03958600  |
| H | -0.73860600 | -3.25743500 | 2.86853300  |
| H | -1.31833800 | -0.26731900 | 2.54272300  |
| H | -0.04547600 | -2.04093300 | 1.94303000  |
| H | -1.64347400 | 2.44343200  | 1.70510600  |
| H | 3.34106400  | 2.90759100  | 1.09312100  |
| C | 2.84331700  | 1.98102400  | 1.38535900  |
| O | 2.21124400  | 1.49694400  | 0.16842500  |
| C | 1.81369900  | 2.24632300  | 2.48444700  |
| H | 3.59897700  | 1.26405100  | 1.72302600  |
| P | 1.73148100  | -0.01035900 | -0.09408700 |
| C | 2.47462600  | 2.85197700  | 3.71911400  |
| H | 1.05086700  | 2.92589000  | 2.08531300  |
| O | 1.16979000  | 1.00512200  | 2.84243000  |
| O | 1.89642400  | -0.79699900 | 1.27282800  |
| O | 2.77991500  | -0.67709100 | -1.11753000 |
| O | 0.38232600  | -0.05071100 | -0.73795000 |
| H | 3.23185700  | 2.17445300  | 4.12731100  |
| H | 2.95217500  | 3.80888800  | 3.48294300  |
| H | 1.72379400  | 3.02429100  | 4.49442200  |
| H | 0.18832600  | 0.97971900  | 2.56025000  |
| H | 1.65533300  | -0.14837900 | 2.05590000  |
| C | 4.16363600  | -0.69135000 | -0.90343600 |
| C | 4.73141800  | -1.72180900 | -0.15329000 |
| C | 4.94091800  | 0.29502600  | -1.51221100 |
| C | 6.11521100  | -1.75872800 | 0.00319600  |
| H | 4.09616600  | -2.47790200 | 0.29445200  |
| C | 6.32480100  | 0.25850400  | -1.35501800 |
| H | 4.46335200  | 1.06971500  | -2.10264900 |
| C | 6.88822700  | -0.76604200 | -0.59633100 |
| H | 6.60006900  | -2.54037600 | 0.57491000  |
| H | 6.96716900  | 1.00156200  | -1.81133800 |
| N | 8.35300900  | -0.80380100 | -0.42608600 |
| O | 8.81948900  | -1.72209200 | 0.24367800  |
| O | 9.00623700  | 0.08744700  | -0.96319600 |

**TS-4a”:**

|   |             |             |             |
|---|-------------|-------------|-------------|
| N | -1.99046600 | -0.52423400 | -1.98963600 |
| C | -1.44723000 | 0.61128400  | -2.77294200 |
| C | -3.44598500 | -0.68694800 | -2.19842000 |
| C | -1.24301600 | -1.78545300 | -2.18955400 |
| C | -4.21323800 | -1.14807500 | -0.97286500 |
| C | -5.33369300 | -1.95028400 | -1.12280400 |

|    |             |             |             |
|----|-------------|-------------|-------------|
| C  | -6.10227100 | -2.24042000 | 0.01417700  |
| C  | -4.56713600 | -0.92016700 | 1.31402900  |
| C  | -5.72909200 | -1.72190200 | 1.23746900  |
| C  | -1.31791300 | -2.69679200 | -0.97662800 |
| C  | -1.57146800 | -4.05832300 | -1.07388800 |
| C  | -1.53600200 | -4.82436600 | 0.09916400  |
| C  | -0.92238000 | -2.84582200 | 1.31085400  |
| C  | -1.19659700 | -4.22476300 | 1.30333400  |
| C  | -1.99244500 | 1.93523200  | -2.26165700 |
| C  | -2.24469600 | 2.98889700  | -3.12513800 |
| C  | -2.69711700 | 4.20053900  | -2.57875200 |
| C  | -2.63066400 | 3.18652400  | -0.39854500 |
| C  | -2.89494200 | 4.30910600  | -1.21623600 |
| N  | -2.18376400 | 2.02791900  | -0.92310600 |
| N  | -3.81422900 | -0.65382600 | 0.22414900  |
| N  | -1.05022100 | -2.09857100 | 0.20357300  |
| N  | -0.49533700 | -2.16278500 | 2.45878200  |
| N  | -2.85539000 | 3.23068400  | 0.95238600  |
| N  | -4.15390900 | -0.41626600 | 2.52032200  |
| H  | -3.02897000 | 4.12477200  | 1.38422700  |
| H  | -3.48162500 | 0.33955100  | 2.52051300  |
| H  | -4.81085900 | -0.42773300 | 3.28560600  |
| H  | -1.66402700 | 0.50710500  | -3.84558200 |
| H  | -0.36050600 | 0.60445200  | -2.63902400 |
| H  | -3.64117100 | -1.36722800 | -3.03855800 |
| H  | -3.84915000 | 0.29102400  | -2.48370300 |
| H  | -0.18990600 | -1.52254000 | -2.33706700 |
| H  | -1.58823500 | -2.31428100 | -3.08860800 |
| H  | -5.61273300 | -2.32847400 | -2.10041800 |
| H  | -6.98848400 | -2.86297300 | -0.06662800 |
| H  | -6.30758600 | -1.91895900 | 2.13467700  |
| H  | -1.78899600 | -4.51327400 | -2.03438500 |
| H  | -1.74376000 | -5.88967400 | 0.06283800  |
| H  | -1.10742700 | -4.80669700 | 2.21541200  |
| H  | -2.09131100 | 2.87643700  | -4.19296000 |
| H  | -2.89788300 | 5.04984200  | -3.22511900 |
| H  | -3.25274600 | 5.23158800  | -0.76975800 |
| Zn | -1.61859800 | 0.11706100  | 0.10362900  |
| O  | -1.46465600 | 0.72779800  | 2.14479500  |
| H  | -0.36026400 | -2.77221600 | 3.25792300  |
| H  | -1.36723700 | -0.09277800 | 2.66398900  |
| H  | 0.35641100  | -1.63089300 | 2.27024100  |
| H  | -2.46790500 | 2.50724100  | 1.54431800  |
| H  | 2.75096100  | 4.01385500  | 0.85325600  |

|   |             |             |             |
|---|-------------|-------------|-------------|
| C | 2.51980600  | 3.09032500  | 1.38901100  |
| O | 2.62687300  | 2.01916900  | 0.43580600  |
| C | 1.10552800  | 3.06475700  | 1.96937400  |
| H | 3.26892100  | 2.92599200  | 2.17289500  |
| P | 1.69751000  | 0.69218200  | 0.53101200  |
| C | 0.99753000  | 3.79557400  | 3.30211400  |
| H | 0.41205400  | 3.51576700  | 1.23938500  |
| O | 0.82607600  | 1.68193800  | 2.09150100  |
| O | 2.02553200  | -0.36317800 | 1.75597800  |
| O | 2.59592000  | -0.14887800 | -0.59151000 |
| O | 0.36412400  | 0.61384400  | -0.19632200 |
| H | 1.66525800  | 3.34522300  | 4.04396200  |
| H | 1.26556700  | 4.85248300  | 3.18898700  |
| H | -0.02486400 | 3.74726200  | 3.68970800  |
| H | -0.51144900 | 1.20907200  | 2.17823000  |
| H | 1.87011800  | 0.13239400  | 2.58034000  |
| C | 3.96468500  | -0.33281500 | -0.54679000 |
| C | 4.50277700  | -1.42078400 | 0.14985700  |
| C | 4.79108500  | 0.52555300  | -1.28130900 |
| C | 5.87604900  | -1.64684700 | 0.12126800  |
| H | 3.84204900  | -2.07658100 | 0.70509600  |
| C | 6.16398100  | 0.30329100  | -1.31308500 |
| H | 4.34731900  | 1.35778300  | -1.81644700 |
| C | 6.68830100  | -0.77989600 | -0.60805700 |
| H | 6.32504600  | -2.47981800 | 0.64810900  |
| H | 6.83056200  | 0.94852600  | -1.87196500 |
| N | 8.13859400  | -1.01847000 | -0.63945700 |
| O | 8.57034900  | -1.98193100 | -0.00757800 |
| O | 8.82928500  | -0.23957700 | -1.29473300 |

**5a”:**

|   |             |             |             |
|---|-------------|-------------|-------------|
| N | -1.97980000 | -0.52972000 | -1.98874100 |
| C | -1.45138900 | 0.61348800  | -2.77097800 |
| C | -3.43321800 | -0.71189000 | -2.19537000 |
| C | -1.21528500 | -1.78079100 | -2.18887000 |
| C | -4.19255800 | -1.18222900 | -0.96817500 |
| C | -5.30225500 | -1.99943800 | -1.11672400 |
| C | -6.06505700 | -2.30093600 | 0.02111900  |
| C | -4.54558100 | -0.96155900 | 1.31973800  |
| C | -5.69659400 | -1.77886100 | 1.24432500  |
| C | -1.27790800 | -2.69330300 | -0.97593600 |
| C | -1.50964200 | -4.05888200 | -1.07284400 |
| C | -1.46397800 | -4.82368500 | 0.10055600  |



|    |             |             |             |
|----|-------------|-------------|-------------|
| C  | -0.88332800 | -2.83549300 | 1.31226200  |
| C  | -1.13574400 | -4.21829200 | 1.30518500  |
| C  | -2.01593200 | 1.92948100  | -2.26011900 |
| C  | -2.28236300 | 2.97944700  | -3.12392300 |
| C  | -2.75305600 | 4.18433500  | -2.57830900 |
| C  | -2.67547300 | 3.17113100  | -0.39830800 |
| C  | -2.95465100 | 4.28984300  | -1.21601700 |
| N  | -2.21090900 | 2.01925100  | -0.92185100 |
| N  | -3.79828900 | -0.68348200 | 0.22885200  |
| N  | -1.02158200 | -2.09116000 | 0.20457200  |
| N  | -0.46617200 | -2.14340800 | 2.45962600  |
| N  | -2.90333000 | 3.21223600  | 0.95279300  |
| N  | -4.13682500 | -0.45533500 | 2.52692300  |
| H  | -3.08614000 | 4.10493200  | 1.38389600  |
| H  | -3.47766300 | 0.31165900  | 2.52861900  |
| H  | -4.79274700 | -0.47806400 | 3.29292000  |
| H  | -1.66497200 | 0.50664200  | -3.84399300 |
| H  | -0.36487300 | 0.62170000  | -2.63488400 |
| H  | -3.62066400 | -1.39573200 | -3.03435800 |
| H  | -3.84990700 | 0.26017900  | -2.48133500 |
| H  | -0.16576800 | -1.50340600 | -2.33570000 |
| H  | -1.55292600 | -2.31407500 | -3.08817000 |
| H  | -5.57755700 | -2.38071300 | -2.09418800 |
| H  | -6.94291900 | -2.93529700 | -0.05882900 |
| H  | -6.27056000 | -1.98488000 | 2.14241800  |
| H  | -1.71818900 | -4.51778200 | -2.03346800 |
| H  | -1.65457200 | -5.89219200 | 0.06433300  |
| H  | -1.03834500 | -4.79850500 | 2.21751000  |
| H  | -2.12573800 | 2.86925300  | -4.19150500 |
| H  | -2.96519600 | 5.03063600  | -3.22496700 |
| H  | -3.32647900 | 5.20699000  | -0.77002100 |
| Zn | -1.61446400 | 0.11443900  | 0.10207600  |
| O  | -1.46170700 | 0.72260000  | 2.15630700  |
| H  | -0.33078900 | -2.74965600 | 3.26133400  |
| H  | -1.34377800 | -0.10514400 | 2.66155400  |
| H  | 0.38628700  | -1.61122800 | 2.27061300  |
| H  | -2.50093500 | 2.49756000  | 1.54486700  |
| H  | 2.73777800  | 4.05153000  | 0.79787000  |
| C  | 2.51958100  | 3.13615900  | 1.35288700  |
| O  | 2.63245400  | 2.04544200  | 0.42471800  |
| C  | 1.10603500  | 3.10358200  | 1.93478000  |
| H  | 3.27209400  | 2.99751300  | 2.13854500  |
| P  | 1.68274200  | 0.73084400  | 0.55299100  |
| C  | 0.98815500  | 3.83765000  | 3.26404400  |

|   |             |             |             |
|---|-------------|-------------|-------------|
| H | 0.40718900  | 3.54157900  | 1.20231200  |
| O | 0.84008000  | 1.71696000  | 2.06655500  |
| O | 2.01417000  | -0.33600600 | 1.77389300  |
| O | 2.57611000  | -0.12933900 | -0.56890000 |
| O | 0.35297000  | 0.64313200  | -0.18590800 |
| H | 1.66112200  | 3.39883000  | 4.00799100  |
| H | 1.24403200  | 4.89695800  | 3.14580400  |
| H | -0.03381000 | 3.77973200  | 3.65154100  |
| H | -0.53037200 | 1.21045600  | 2.18111100  |
| H | 1.87979900  | 0.15569400  | 2.60297400  |
| C | 3.94264100  | -0.31866700 | -0.53164500 |
| C | 4.48323400  | -1.39979200 | 0.17467600  |
| C | 4.76801600  | 0.52578600  | -1.28417400 |
| C | 5.85508400  | -1.63264400 | 0.13738800  |
| H | 3.82459800  | -2.04531800 | 0.74415800  |
| C | 6.13942300  | 0.29700100  | -1.32480700 |
| H | 4.32352800  | 1.35315600  | -1.82623000 |
| C | 6.66520000  | -0.77934100 | -0.61024400 |
| H | 6.30482500  | -2.46071600 | 0.67131200  |
| H | 6.80404300  | 0.93190300  | -1.89770500 |
| N | 8.11357500  | -1.02519700 | -0.65119000 |
| O | 8.54661200  | -1.98283200 | -0.01095900 |
| O | 8.80250700  | -0.25807500 | -1.32238700 |

**TS-6a”:**

|   |             |             |             |
|---|-------------|-------------|-------------|
| N | -2.64211500 | -0.44423700 | -1.78609000 |
| C | -2.65148100 | 0.80904200  | -2.57485500 |
| C | -4.04347500 | -0.84509000 | -1.50952900 |
| C | -1.85673900 | -1.53871400 | -2.40218400 |
| C | -4.21409300 | -1.78074200 | -0.33838900 |
| C | -5.08333400 | -2.85609100 | -0.43185300 |
| C | -5.31867100 | -3.61710600 | 0.72471300  |
| C | -3.79496800 | -2.16720600 | 1.90431600  |
| C | -4.68180200 | -3.27496900 | 1.89725700  |
| C | -1.23376000 | -2.46386100 | -1.36788600 |
| C | -1.19499000 | -3.84090100 | -1.52794800 |
| C | -0.53508100 | -4.60259800 | -0.55319500 |
| C | 0.03913500  | -2.56773400 | 0.58790800  |
| C | 0.09543600  | -3.97077200 | 0.50786300  |
| C | -3.05561300 | 1.98190000  | -1.69665300 |
| C | -3.90679100 | 2.98927700  | -2.12603700 |
| C | -4.14974100 | 4.06202700  | -1.25525200 |
| C | -2.60389600 | 3.08661800  | 0.30944900  |

|    |             |             |             |
|----|-------------|-------------|-------------|
| C  | -3.48951100 | 4.12600100  | -0.03808800 |
| N  | -2.47582500 | 2.00230800  | -0.47786400 |
| N  | -3.55961900 | -1.43328100 | 0.79300300  |
| N  | -0.65841300 | -1.84946900 | -0.31227600 |
| N  | 0.68540000  | -1.83268300 | 1.58566200  |
| N  | -1.80644900 | 3.11954800  | 1.45308300  |
| N  | -3.13752500 | -1.83176700 | 3.05008300  |
| H  | -1.93533600 | 3.96328700  | 1.99998900  |
| H  | -2.60522700 | -0.97100000 | 3.07433100  |
| H  | -3.42150500 | -2.25041600 | 3.92075600  |
| H  | -3.31384300 | 0.73652000  | -3.44913300 |
| H  | -1.63384700 | 0.98644300  | -2.94179500 |
| H  | -4.49079600 | -1.28232300 | -2.41381800 |
| H  | -4.59966100 | 0.07213700  | -1.28593000 |
| H  | -1.03958900 | -1.08169700 | -2.97253000 |
| H  | -2.46577700 | -2.11682300 | -3.10986600 |
| H  | -5.58100300 | -3.08579900 | -1.36789000 |
| H  | -5.99810700 | -4.46401800 | 0.69797100  |
| H  | -4.84270400 | -3.83777200 | 2.81182300  |
| H  | -1.66905100 | -4.31240300 | -2.38205000 |
| H  | -0.49806000 | -5.68449700 | -0.63967600 |
| H  | 0.64982900  | -4.53616400 | 1.25012800  |
| H  | -4.36988300 | 2.94384800  | -3.10596600 |
| H  | -4.82779700 | 4.85857800  | -1.54695800 |
| H  | -3.61532100 | 4.97724100  | 0.62366600  |
| Zn | -1.52565300 | 0.10511500  | 0.12821200  |
| O  | -1.28992800 | 0.19323900  | 2.30305700  |
| H  | 1.22820700  | -2.41360300 | 2.21557400  |
| H  | -0.45176700 | -0.30500400 | 2.42596100  |
| H  | 1.28493000  | -1.10513300 | 1.16772300  |
| H  | -0.81088100 | 2.98971300  | 1.22900500  |
| H  | 2.91921000  | 3.98518300  | -1.71343200 |
| C  | 2.79673300  | 3.68504500  | -0.67009700 |
| O  | 2.65955200  | 2.25692400  | -0.64228500 |
| C  | 1.53078000  | 4.24886700  | -0.02055800 |
| H  | 3.69444100  | 3.96057500  | -0.10300800 |
| P  | 1.61891700  | 1.62562400  | 0.45902100  |
| C  | 1.70987500  | 5.62863600  | 0.59173200  |
| H  | 0.72104200  | 4.27264700  | -0.76873600 |
| O  | 1.21226600  | 3.28338100  | 0.97746600  |
| O  | 2.04646800  | 1.34534200  | 2.03466200  |
| O  | 2.25324700  | 0.04336000  | 0.06655900  |
| O  | 0.18512200  | 1.24918500  | 0.05599800  |
| H  | 2.49210500  | 5.61278700  | 1.35748100  |

|   |             |             |             |
|---|-------------|-------------|-------------|
| H | 1.99045100  | 6.35633300  | -0.17818100 |
| H | 0.78055100  | 5.97239200  | 1.05587500  |
| H | -1.14789500 | 1.13290700  | 2.50668300  |
| H | 1.95969000  | 2.18147300  | 2.51978300  |
| C | 3.56308100  | -0.33768900 | -0.04623400 |
| C | 4.61800300  | 0.23490100  | 0.68270600  |
| C | 3.81818100  | -1.40688000 | -0.92074500 |
| C | 5.91105900  | -0.25505600 | 0.52810500  |
| H | 4.42489200  | 1.04609300  | 1.37274200  |
| C | 5.10666400  | -1.90359800 | -1.06999900 |
| H | 2.99110200  | -1.82717200 | -1.48458100 |
| C | 6.14324800  | -1.31854600 | -0.34304900 |
| H | 6.74184600  | 0.17021900  | 1.07811700  |
| H | 5.32440300  | -2.72519000 | -1.74135400 |
| N | 7.50624000  | -1.83615400 | -0.49705600 |
| O | 8.40098500  | -1.28883400 | 0.14704200  |
| O | 7.67101600  | -2.78829500 | -1.26039600 |

**7a”:**

|   |             |             |             |
|---|-------------|-------------|-------------|
| N | -3.00191500 | -0.26309100 | -1.57977200 |
| C | -3.22212900 | 1.07023900  | -2.18225300 |
| C | -4.27280600 | -0.76244400 | -0.99975900 |
| C | -2.41463900 | -1.21852000 | -2.54912500 |
| C | -4.10735900 | -1.74726900 | 0.13467600  |
| C | -4.97210300 | -2.82196400 | 0.24142400  |
| C | -4.87547300 | -3.64094900 | 1.37916800  |
| C | -3.07379100 | -2.23694800 | 2.15830000  |
| C | -3.93589500 | -3.35049100 | 2.34142600  |
| C | -1.67654300 | -2.35768900 | -1.87510900 |
| C | -1.78777700 | -3.66480400 | -2.31796600 |
| C | -1.00079400 | -4.64345700 | -1.68840800 |
| C | -0.04225400 | -2.91636300 | -0.30952400 |
| C | -0.12050200 | -4.27657000 | -0.68919000 |
| C | -3.45554300 | 2.11458200  | -1.11002100 |
| C | -4.46207900 | 3.06805400  | -1.20923700 |
| C | -4.56554600 | 4.03081500  | -0.19839800 |
| C | -2.62749800 | 3.06078700  | 0.83589200  |
| C | -3.63363300 | 4.04198800  | 0.82961800  |
| N | -2.58955700 | 2.07628300  | -0.07671700 |
| N | -3.15666300 | -1.45030600 | 1.05570400  |
| N | -0.85413000 | -1.99321000 | -0.86590300 |
| N | 0.83521900  | -2.47319900 | 0.64958500  |
| N | -1.58637800 | 3.05397700  | 1.78326200  |

|    |             |             |             |
|----|-------------|-------------|-------------|
| N  | -2.13624700 | -1.94730700 | 3.09479700  |
| H  | -1.67195800 | 3.80610000  | 2.45967200  |
| H  | -1.57804200 | -1.10395600 | 3.01375700  |
| H  | -2.09008300 | -2.49280000 | 3.93942200  |
| H  | -4.05985100 | 1.05665600  | -2.89441300 |
| H  | -2.31675700 | 1.33811900  | -2.73832100 |
| H  | -4.90256900 | -1.19765900 | -1.78823300 |
| H  | -4.81088300 | 0.10673400  | -0.60480700 |
| H  | -1.68918700 | -0.66159600 | -3.15342600 |
| H  | -3.18291300 | -1.60965500 | -3.23050400 |
| H  | -5.71072300 | -3.01429800 | -0.52904500 |
| H  | -5.53767400 | -4.49308300 | 1.50123600  |
| H  | -3.83825700 | -3.95637600 | 3.23698600  |
| H  | -2.46186000 | -3.92000000 | -3.12849200 |
| H  | -1.06746200 | -5.68169500 | -2.00014300 |
| H  | 0.52871300  | -5.00576000 | -0.21472000 |
| H  | -5.14874200 | 3.05998200  | -2.04916700 |
| H  | -5.35042000 | 4.78047600  | -0.23173200 |
| H  | -3.65498200 | 4.80807600  | 1.59857500  |
| Zn | -1.48218000 | -0.06386400 | 0.09300100  |
| O  | -0.87461000 | 0.40463800  | 2.18627200  |
| H  | 1.49213400  | -3.16433800 | 0.98592700  |
| H  | 0.09992600  | 0.51453300  | 2.20167100  |
| H  | 1.27881400  | -1.57122500 | 0.45122400  |
| H  | -0.66720500 | 3.10977200  | 1.31043100  |
| H  | 2.84879000  | 3.71669200  | -2.19399800 |
| C  | 2.68173200  | 3.50009600  | -1.13620900 |
| O  | 2.65361000  | 2.07277400  | -0.98505700 |
| C  | 1.33661500  | 4.01543400  | -0.61847000 |
| H  | 3.51708300  | 3.89340300  | -0.54486300 |
| P  | 1.54642300  | 1.42975100  | 0.03724100  |
| C  | 1.37782300  | 5.45044500  | -0.11811600 |
| H  | 0.57759600  | 3.91540200  | -1.41085500 |
| O  | 1.02726800  | 3.10920600  | 0.43662400  |
| O  | 1.78217700  | 1.28538100  | 1.69582800  |
| O  | 2.32325100  | -0.10771600 | -0.14986900 |
| O  | 0.19382700  | 0.93806600  | -0.48868800 |
| H  | 2.10288500  | 5.55675100  | 0.69542500  |
| H  | 1.66441100  | 6.12959300  | -0.92897500 |
| H  | 0.39568900  | 5.76545300  | 0.24778500  |
| H  | -1.22892000 | 1.32518100  | 2.30220200  |
| H  | 1.74739400  | 2.17996700  | 2.07226500  |
| C  | 3.68058600  | -0.33383300 | -0.06228800 |
| C  | 4.32457300  | -0.41132000 | 1.18053200  |

|   |            |             |             |
|---|------------|-------------|-------------|
| C | 4.39139700 | -0.57590000 | -1.24564500 |
| C | 5.68103500 | -0.72309300 | 1.23829200  |
| H | 3.75998000 | -0.22525300 | 2.08672000  |
| C | 5.74499900 | -0.88860100 | -1.19255700 |
| H | 3.86916400 | -0.50842300 | -2.19398300 |
| C | 6.37323600 | -0.95633900 | 0.05152900  |
| H | 6.20679400 | -0.79185100 | 2.18291200  |
| H | 6.31987100 | -1.07876600 | -2.09058800 |
| N | 7.80351800 | -1.28887900 | 0.11268800  |
| O | 8.32720400 | -1.34716000 | 1.22470600  |
| O | 8.38696700 | -1.48915000 | -0.95176400 |

**(2) catalyst B:**

**1b:**

|   |            |             |             |
|---|------------|-------------|-------------|
| C | 2.90886700 | 2.10095600  | -0.04708900 |
| C | 4.36180500 | 0.14383200  | 0.25486900  |
| C | 2.60460100 | 0.66201300  | 1.92351400  |
| C | 4.35651800 | -1.32086600 | -0.16349800 |
| C | 5.46831600 | -2.12935100 | 0.08625800  |
| C | 5.48253100 | -3.43769300 | -0.39353000 |
| C | 3.30185900 | -3.04960700 | -1.29496800 |
| C | 4.37795300 | -3.91005500 | -1.10381400 |
| C | 2.01783900 | -0.68369700 | 2.31302300  |
| C | 2.09509400 | -1.15037700 | 3.62817900  |
| C | 1.43363300 | -2.32872700 | 3.97123300  |
| C | 0.70406600 | -2.49578600 | 1.69867800  |
| C | 0.71816700 | -3.01588100 | 2.98912700  |
| C | 2.87172000 | 2.09391500  | -1.56588900 |
| C | 3.32050800 | 3.19178800  | -2.30303900 |
| C | 3.19390400 | 3.17638000  | -3.69070100 |
| C | 2.22518800 | 0.99747300  | -3.50362100 |
| C | 2.63600700 | 2.05569800  | -4.30753000 |
| H | 3.72038000 | 2.75362400  | 0.30599900  |
| H | 1.96357300 | 2.51987100  | 0.31236500  |
| H | 5.01187000 | 0.27103700  | 1.13119800  |
| H | 4.82949200 | 0.70626900  | -0.56203200 |
| H | 1.81351500 | 1.40771300  | 2.08013300  |
| H | 3.43576900 | 0.91739700  | 2.59637900  |
| H | 6.31055600 | -1.73424800 | 0.64636400  |
| H | 6.33898400 | -4.07982800 | -0.21096900 |
| H | 4.34412700 | -4.92228900 | -1.49214300 |
| H | 2.65784100 | -0.59067100 | 4.36927100  |
| H | 1.47696000 | -2.70531200 | 4.98895700  |

|    |             |             |             |
|----|-------------|-------------|-------------|
| H  | 0.18668500  | -3.93427100 | 3.21431000  |
| H  | 3.75261200  | 4.04656000  | -1.79178300 |
| H  | 3.52875800  | 4.02350800  | -4.28173600 |
| H  | 2.52147100  | 2.00030600  | -5.38469800 |
| Zn | 1.51743900  | -0.44112100 | -0.66125600 |
| H  | 2.40930600  | -3.37976200 | -1.81857500 |
| H  | 0.17025500  | -2.99498900 | 0.89498800  |
| H  | 1.78831500  | 0.10430900  | -3.94187400 |
| N  | 2.33645300  | 1.01225300  | -2.16491700 |
| N  | 3.29015800  | -1.78346800 | -0.84288600 |
| N  | 1.33891400  | -1.35882300 | 1.36785100  |
| N  | 3.02712800  | 0.73167500  | 0.50621500  |
| O  | 0.02646800  | -1.72951900 | -1.65982000 |
| H  | -0.00678800 | -2.02721100 | -2.57761300 |
| H  | -2.92690900 | 1.02008200  | 3.09891200  |
| C  | -2.18465700 | 1.55060100  | 2.49502300  |
| O  | -1.75337400 | 0.61151900  | 1.48320900  |
| C  | -1.01748400 | 2.00194900  | 3.37881300  |
| H  | -2.66760400 | 2.40660600  | 2.01362300  |
| P  | -1.45177400 | 1.07992200  | -0.03641100 |
| C  | -1.51216900 | 2.94636900  | 4.47814500  |
| H  | -0.57761700 | 1.10871000  | 3.83960700  |
| O  | 0.04193000  | 2.57702300  | 2.61715700  |
| O  | -2.10326600 | 2.38818100  | -0.37091200 |
| O  | -2.14793600 | -0.20526800 | -0.86968200 |
| O  | 0.01246400  | 0.86746300  | -0.38129500 |
| H  | -1.95715700 | 3.85082800  | 4.04736600  |
| H  | -2.26604600 | 2.46407300  | 5.11042300  |
| H  | -0.67460100 | 3.24947000  | 5.11228200  |
| H  | -0.26394400 | 3.37772600  | 2.13703900  |
| H  | -1.15015500 | 5.34200700  | 0.73904500  |
| O  | -0.72740300 | 4.47556800  | 0.74836600  |
| H  | -1.28205600 | 3.86864900  | 0.20540500  |
| H  | -0.82911100 | -1.26861400 | -1.47572400 |
| C  | -3.51700400 | -0.46758700 | -0.87398300 |
| C  | -3.92680400 | -1.75200600 | -0.50752500 |
| C  | -4.43617500 | 0.50185800  | -1.28661200 |
| C  | -5.27759600 | -2.08218100 | -0.55821000 |
| H  | -3.18836000 | -2.47825100 | -0.18313300 |
| C  | -5.78922700 | 0.17377400  | -1.32833500 |
| H  | -4.08926200 | 1.49238300  | -1.55687800 |
| C  | -6.19030600 | -1.11149900 | -0.96701300 |
| H  | -5.63307800 | -3.06754400 | -0.28363900 |
| H  | -6.53332100 | 0.89566500  | -1.64210500 |

|   |             |             |             |
|---|-------------|-------------|-------------|
| N | -7.62016200 | -1.45751300 | -1.01993800 |
| O | -7.93738300 | -2.60253300 | -0.70190300 |
| O | -8.40292400 | -0.58063600 | -1.37889700 |

**TS-2b:**

|    |            |             |             |
|----|------------|-------------|-------------|
| C  | 2.89895900 | 1.94902300  | 0.92463900  |
| C  | 4.35934500 | 0.06047900  | 0.33420900  |
| C  | 2.57605100 | -0.21396200 | 2.03875400  |
| C  | 4.36103000 | -1.01408200 | -0.74765500 |
| C  | 5.49011800 | -1.81564800 | -0.93643100 |
| C  | 5.51049700 | -2.72879600 | -1.98865700 |
| C  | 3.30373500 | -2.00578500 | -2.55900400 |
| C  | 4.39534500 | -2.82608400 | -2.82255300 |
| C  | 2.06201300 | -1.62032500 | 1.78200600  |
| C  | 2.19606600 | -2.63027100 | 2.73767000  |
| C  | 1.59383100 | -3.86725700 | 2.50689400  |
| C  | 0.80883400 | -3.01305400 | 0.41308700  |
| C  | 0.87978500 | -4.06364200 | 1.32414000  |
| C  | 2.84901000 | 2.62072000  | -0.43706000 |
| C  | 3.34069700 | 3.91366700  | -0.62711600 |
| C  | 3.19571500 | 4.52014900  | -1.87411800 |
| C  | 2.12501300 | 2.52211100  | -2.63764100 |
| C  | 2.57452000 | 3.81196800  | -2.90334800 |
| H  | 3.71200000 | 2.37928300  | 1.52739500  |
| H  | 1.95217800 | 2.15063000  | 1.43667100  |
| H  | 4.98273000 | -0.27122400 | 1.17566000  |
| H  | 4.85737500 | 0.94075300  | -0.08980200 |
| H  | 1.73848400 | 0.36641200  | 2.44758000  |
| H  | 3.37444200 | -0.23677200 | 2.79469700  |
| H  | 6.34041500 | -1.72061800 | -0.26752600 |
| H  | 6.37996700 | -3.35854500 | -2.15175900 |
| H  | 4.36612200 | -3.52591300 | -3.65075500 |
| H  | 2.75500700 | -2.44402300 | 3.64986500  |
| H  | 1.68104200 | -4.66443900 | 3.23916600  |
| H  | 0.39249100 | -5.00828000 | 1.10758300  |
| H  | 3.82351900 | 4.43582000  | 0.19340000  |
| H  | 3.56547600 | 5.52742100  | -2.04093000 |
| H  | 2.44213200 | 4.24462100  | -3.88911500 |
| Zn | 1.49637100 | -0.05952000 | -0.74877600 |
| H  | 2.40351800 | -2.06167200 | -3.16439700 |
| H  | 0.27252100 | -3.11562600 | -0.52609700 |
| H  | 1.63921700 | 1.93210000  | -3.40983000 |
| N  | 2.25566200 | 1.93766800  | -1.43573200 |



|   |             |             |             |
|---|-------------|-------------|-------------|
| N | 3.28631100  | -1.11545000 | -1.55102200 |
| N | 1.38752500  | -1.82193200 | 0.63512900  |
| N | 3.02202100  | 0.47812400  | 0.80844400  |
| O | -0.01636400 | -0.70316200 | -2.15288800 |
| H | -0.09408500 | -0.54688400 | -3.10181100 |
| H | -2.39142200 | -1.35181200 | 3.34322700  |
| C | -2.17343600 | -0.33571200 | 3.00591000  |
| O | -1.91453100 | -0.44133700 | 1.58864900  |
| C | -0.94080700 | 0.28041600  | 3.67247800  |
| H | -3.05724700 | 0.29590200  | 3.15466500  |
| P | -1.38811200 | 0.84591900  | 0.75936200  |
| C | -1.23521800 | 0.74468500  | 5.09963800  |
| H | -0.15514500 | -0.49643200 | 3.71179400  |
| O | -0.51723300 | 1.31613400  | 2.81661300  |
| O | -2.24813600 | 2.13306900  | 0.89199600  |
| O | -2.03900500 | 0.25031300  | -0.72485200 |
| O | 0.05175500  | 0.91980100  | 0.27688200  |
| H | -2.01284900 | 1.51530400  | 5.10770500  |
| H | -1.56939400 | -0.09300400 | 5.72375900  |
| H | -0.33351300 | 1.16588200  | 5.55509900  |
| H | -1.07961200 | 2.48874800  | 3.04711800  |
| H | -1.30436400 | 4.20650100  | 2.87425900  |
| O | -1.76536200 | 3.36001000  | 2.91037900  |
| H | -2.08778400 | 2.81126700  | 1.76696100  |
| H | -0.85773000 | -0.37054100 | -1.72249400 |
| C | -3.39093300 | -0.00772500 | -0.91858100 |
| C | -3.83933300 | -1.33160200 | -0.88195700 |
| C | -4.26496400 | 1.04330800  | -1.21312800 |
| C | -5.17613800 | -1.61377600 | -1.14828900 |
| H | -3.14044400 | -2.12407100 | -0.63604600 |
| C | -5.60382800 | 0.76526000  | -1.47526600 |
| H | -3.89097900 | 2.06041500  | -1.22234900 |
| C | -6.03899700 | -0.55900000 | -1.44105500 |
| H | -5.55902400 | -2.62662300 | -1.13011100 |
| H | -6.31029300 | 1.55272700  | -1.70726100 |
| N | -7.45237500 | -0.85485200 | -1.72669400 |
| O | -7.80330900 | -2.03341400 | -1.69143500 |
| O | -8.19027400 | 0.09411400  | -1.98406500 |

**3b:**

|   |            |            |             |
|---|------------|------------|-------------|
| C | 2.61752600 | 2.22769200 | -0.71959600 |
| C | 4.33626600 | 0.47704000 | -0.74645500 |
| C | 3.32377500 | 1.18789200 | 1.39538400  |

|    |             |             |             |
|----|-------------|-------------|-------------|
| C  | 4.37359700  | -1.03816500 | -0.88680400 |
| C  | 5.59440000  | -1.70953900 | -0.99046800 |
| C  | 5.59756500  | -3.08503400 | -1.21562900 |
| C  | 3.20683900  | -3.01643300 | -1.18793000 |
| C  | 4.37826200  | -3.75573900 | -1.32051100 |
| C  | 3.16147800  | -0.09892100 | 2.18955900  |
| C  | 3.85819000  | -0.31259300 | 3.38022500  |
| C  | 3.57689800  | -1.45359000 | 4.13235400  |
| C  | 1.97450800  | -2.07233200 | 2.46402700  |
| C  | 2.61239600  | -2.34956800 | 3.67107600  |
| C  | 1.98291100  | 1.91284100  | -2.06417800 |
| C  | 1.99171200  | 2.83979400  | -3.10759800 |
| C  | 1.30916000  | 2.54014900  | -4.28686600 |
| C  | 0.69897200  | 0.44168800  | -3.31276800 |
| C  | 0.64542300  | 1.31820700  | -4.39312300 |
| H  | 3.39633700  | 2.99530500  | -0.83974100 |
| H  | 1.83455000  | 2.63484500  | -0.07096600 |
| H  | 5.25496700  | 0.82434400  | -0.25358000 |
| H  | 4.35335200  | 0.89325600  | -1.76062400 |
| H  | 2.54193400  | 1.87514300  | 1.73622100  |
| H  | 4.29413100  | 1.65242800  | 1.62431100  |
| H  | 6.52653400  | -1.15985100 | -0.89882700 |
| H  | 6.53573800  | -3.62509200 | -1.30137600 |
| H  | 4.33303000  | -4.82597900 | -1.49134400 |
| H  | 4.59976700  | 0.40663100  | 3.71518600  |
| H  | 4.10318900  | -1.63896000 | 5.06403100  |
| H  | 2.35982900  | -3.24494900 | 4.22896000  |
| H  | 2.52060600  | 3.78135800  | -2.99356400 |
| H  | 1.29812100  | 3.24877600  | -5.10959100 |
| H  | 0.09928900  | 1.04608200  | -5.28979100 |
| Zn | 1.42393900  | -0.47248300 | -0.28080500 |
| H  | 2.23466000  | -3.49811300 | -1.23586300 |
| H  | 1.21954200  | -2.73777500 | 2.05475900  |
| H  | 0.19621100  | -0.52018100 | -3.34990900 |
| N  | 1.35384100  | 0.72717200  | -2.17644400 |
| N  | 3.20027600  | -1.68820900 | -0.98283000 |
| N  | 2.24532600  | -0.97446900 | 1.74121400  |
| N  | 3.13965100  | 1.01032800  | -0.05986100 |
| O  | -0.02654500 | -1.99617800 | -0.48383400 |
| H  | -0.21738400 | -2.56378600 | -1.23976800 |
| H  | -2.57394700 | 1.40333400  | 3.80457500  |
| C  | -2.52484100 | 1.89646200  | 2.83037000  |
| O  | -2.36913600 | 0.87510600  | 1.83440000  |
| C  | -1.31507300 | 2.81640100  | 2.67215900  |

|   |             |             |             |
|---|-------------|-------------|-------------|
| H | -3.46184200 | 2.43446700  | 2.64220000  |
| P | -1.38808500 | 1.23755700  | 0.56198200  |
| C | -1.52148800 | 4.22180200  | 3.21339600  |
| H | -0.43966200 | 2.35552400  | 3.15835400  |
| O | -1.10447200 | 2.83258200  | 1.26099900  |
| O | -1.97440500 | 1.89421000  | -0.79460800 |
| O | -1.92912900 | -0.38939200 | -0.09972400 |
| O | 0.07971400  | 0.77541900  | 0.58642000  |
| H | -2.38838500 | 4.70022300  | 2.74485800  |
| H | -1.69243300 | 4.19156500  | 4.29527300  |
| H | -0.63706900 | 4.84102400  | 3.03274800  |
| H | -1.70551300 | 4.43429600  | 0.31748300  |
| H | -1.90521500 | 5.39053300  | -0.91896200 |
| O | -2.24092400 | 4.60039700  | -0.48025800 |
| H | -2.05457700 | 2.87648900  | -0.77204700 |
| H | -0.86731700 | -1.42983300 | -0.29983000 |
| C | -3.23347300 | -0.81798500 | -0.18686600 |
| C | -3.62772900 | -1.90940700 | 0.60165800  |
| C | -4.13660900 | -0.23671600 | -1.08936400 |
| C | -4.91307800 | -2.42720900 | 0.48832800  |
| H | -2.91961000 | -2.33194700 | 1.30777300  |
| C | -5.42724200 | -0.74631100 | -1.19864500 |
| H | -3.81693200 | 0.60579500  | -1.68984300 |
| C | -5.79911100 | -1.83636000 | -0.41215900 |
| H | -5.24221100 | -3.26890900 | 1.08524300  |
| H | -6.14556200 | -0.31939000 | -1.88803300 |
| N | -7.15672900 | -2.38076900 | -0.53815500 |
| O | -7.44981700 | -3.34906400 | 0.16351700  |
| O | -7.91715600 | -1.83786500 | -1.33926400 |

**TS-4b:**

|   |             |             |             |
|---|-------------|-------------|-------------|
| C | -2.71948300 | 1.81651300  | 1.58513800  |
| C | -4.37413100 | 0.13136000  | 0.95020700  |
| C | -3.40905000 | 1.61935200  | -0.76914000 |
| C | -4.39395500 | -1.30903800 | 0.46447100  |
| C | -5.60250600 | -1.97525700 | 0.24981000  |
| C | -5.58054500 | -3.32711600 | -0.09155900 |
| C | -3.19129000 | -3.23032600 | -0.00558600 |
| C | -4.35019600 | -3.97245000 | -0.21822100 |
| C | -3.18799700 | 0.73438900  | -1.98671800 |
| C | -3.88493600 | 0.94011800  | -3.17837100 |
| C | -3.55117300 | 0.17383800  | -4.29606000 |
| C | -1.89951300 | -0.93272500 | -2.95978200 |

|    |             |             |             |
|----|-------------|-------------|-------------|
| C  | -2.53581300 | -0.77722900 | -4.18974000 |
| C  | -2.03625800 | 1.04662300  | 2.70383700  |
| C  | -2.05101200 | 1.50750400  | 4.02090000  |
| C  | -1.32162900 | 0.81570200  | 4.98864400  |
| C  | -0.65415300 | -0.72315300 | 3.28119500  |
| C  | -0.60422500 | -0.31984100 | 4.61322300  |
| H  | -3.52917600 | 2.43903400  | 1.99447300  |
| H  | -1.97478700 | 2.48339800  | 1.13888600  |
| H  | -5.30845800 | 0.63448300  | 0.66317300  |
| H  | -4.36217600 | 0.09913300  | 2.04601900  |
| H  | -2.66962500 | 2.42582700  | -0.82139100 |
| H  | -4.40478700 | 2.08459400  | -0.81636200 |
| H  | -6.54360100 | -1.44323200 | 0.35334600  |
| H  | -6.50829900 | -3.86560800 | -0.26062500 |
| H  | -4.28581600 | -5.02209200 | -0.48443300 |
| H  | -4.66808400 | 1.69068200  | -3.23062900 |
| H  | -4.07770800 | 0.31742500  | -5.23502000 |
| H  | -2.24426700 | -1.38946700 | -5.03648000 |
| H  | -2.61921000 | 2.39580200  | 4.28053600  |
| H  | -1.31504100 | 1.15835700  | 6.01908300  |
| H  | -0.01956900 | -0.88378500 | 5.33192900  |
| Zn | -1.41529600 | -0.51473500 | 0.16213400  |
| H  | -2.20953900 | -3.68065300 | -0.11905700 |
| H  | -1.10717000 | -1.66092100 | -2.81006200 |
| H  | -0.10745000 | -1.59632400 | 2.93804800  |
| N  | -1.35697000 | -0.06011600 | 2.34970000  |
| N  | -3.20933200 | -1.93076500 | 0.33292700  |
| N  | -2.22179500 | -0.19366500 | -1.88705700 |
| N  | -3.19964700 | 0.91831000  | 0.51349400  |
| O  | 0.02359400  | -1.89390700 | -0.21189500 |
| H  | 0.10844500  | -2.74035600 | 0.24057800  |
| H  | 2.58259800  | 2.06431600  | -3.30516300 |
| C  | 2.55790800  | 2.39254700  | -2.26377000 |
| O  | 2.24356800  | 1.23992900  | -1.45627300 |
| C  | 1.45951000  | 3.41526600  | -1.97209700 |
| H  | 3.54461700  | 2.76933200  | -1.97038200 |
| P  | 1.33003400  | 1.57631500  | -0.14489500 |
| C  | 1.84787500  | 4.85709400  | -2.24556100 |
| H  | 0.55160900  | 3.15488400  | -2.53623200 |
| O  | 1.19395100  | 3.22000700  | -0.57081700 |
| O  | 2.04902800  | 1.82872400  | 1.25956200  |
| O  | 1.87521800  | -0.44754800 | 0.27907100  |
| O  | -0.11310200 | 1.10741900  | -0.13188300 |
| H  | 2.74434400  | 5.13527900  | -1.68145300 |

|   |            |             |             |
|---|------------|-------------|-------------|
| H | 2.05809900 | 4.99619000  | -3.31165700 |
| H | 1.03323900 | 5.53571300  | -1.97511400 |
| H | 1.99898400 | 4.68637100  | 0.80037200  |
| H | 2.55413700 | 5.06350800  | 2.22028800  |
| O | 2.64282500 | 4.44535200  | 1.48464700  |
| H | 2.30300500 | 2.77619500  | 1.41063400  |
| H | 1.00457800 | -1.22520100 | -0.00551300 |
| C | 3.13814100 | -0.94042000 | 0.14210300  |
| C | 3.41423600 | -1.91117200 | -0.83740000 |
| C | 4.16310400 | -0.50089000 | 0.99739100  |
| C | 4.69208000 | -2.44520900 | -0.95455400 |
| H | 2.62128100 | -2.22983400 | -1.50712400 |
| C | 5.44463200 | -1.02545800 | 0.87543200  |
| H | 3.93441300 | 0.24344800  | 1.75076900  |
| C | 5.69617800 | -1.99445000 | -0.09718600 |
| H | 4.92750300 | -3.19477800 | -1.70023900 |
| H | 6.25008500 | -0.70586600 | 1.52557100  |
| N | 7.04453700 | -2.55409500 | -0.21976100 |
| O | 7.23096400 | -3.41283300 | -1.08323100 |
| O | 7.91068600 | -2.13334800 | 0.54805600  |

**1b':**

|   |             |             |             |
|---|-------------|-------------|-------------|
| C | -2.89610800 | -0.41695500 | 2.19759200  |
| C | -4.32387300 | 0.33410900  | 0.34345400  |
| C | -2.47934600 | 1.77391800  | 1.16466800  |
| C | -4.33860500 | 0.13552000  | -1.16832700 |
| C | -5.45172900 | 0.53335700  | -1.91378000 |
| C | -5.49241300 | 0.26005600  | -3.27939800 |
| C | -3.33398100 | -0.74598000 | -3.06436900 |
| C | -4.41232100 | -0.39754000 | -3.87035800 |
| C | -1.92629800 | 2.40211000  | -0.10381000 |
| C | -1.97069800 | 3.78375400  | -0.30541200 |
| C | -1.33741600 | 4.32736400  | -1.42301100 |
| C | -0.70248800 | 2.10743700  | -2.05180600 |
| C | -0.68432700 | 3.47452000  | -2.31367300 |
| C | -2.91085100 | -1.90633100 | 1.89742800  |
| C | -3.42455600 | -2.82340000 | 2.81646700  |
| C | -3.33796600 | -4.18641500 | 2.53766900  |
| C | -2.27880000 | -3.61926400 | 0.46928300  |
| C | -2.75339300 | -4.59614100 | 1.33878200  |
| H | -3.69878700 | -0.16738600 | 2.90648700  |
| H | -1.94030000 | -0.17996000 | 2.67530200  |
| H | -4.90876900 | 1.22870000  | 0.59668400  |

|    |             |             |             |
|----|-------------|-------------|-------------|
| H  | -4.85883600 | -0.51700300 | 0.78161700  |
| H  | -1.65373700 | 1.72284800  | 1.88568600  |
| H  | -3.25656900 | 2.42102700  | 1.59630200  |
| H  | -6.27475900 | 1.04742000  | -1.42619800 |
| H  | -6.35017200 | 0.56023600  | -3.87378100 |
| H  | -4.39940100 | -0.62735100 | -4.93033000 |
| H  | -2.48671300 | 4.42004200  | 0.40752900  |
| H  | -1.35501000 | 5.39939900  | -1.59569500 |
| H  | -0.17576900 | 3.85584200  | -3.19265400 |
| H  | -3.87604900 | -2.47089600 | 3.73884600  |
| H  | -3.72369900 | -4.91651900 | 3.24279000  |
| H  | -2.66703400 | -5.64604900 | 1.08057900  |
| Zn | -1.50803200 | -0.57907300 | -0.42098000 |
| H  | -2.46071500 | -1.23795700 | -3.48309100 |
| H  | -0.21521000 | 1.39979700  | -2.71654900 |
| H  | -1.82021500 | -3.89325000 | -0.47681600 |
| N  | -2.35143400 | -2.30539500 | 0.73837500  |
| N  | -3.29675100 | -0.49302400 | -1.74390600 |
| N  | -1.31040900 | 1.58345600  | -0.97560600 |
| N  | -2.98175000 | 0.39615800  | 0.96288300  |
| O  | -0.01541500 | -1.38751100 | -1.81205700 |
| H  | 0.01568300  | -2.23114200 | -2.28001800 |
| H  | 2.73569900  | 3.15722000  | 1.12267000  |
| C  | 2.26719200  | 2.36379400  | 1.71169800  |
| O  | 1.67557600  | 1.45783000  | 0.75613600  |
| C  | 1.22083000  | 2.96034300  | 2.65824900  |
| H  | 3.04129500  | 1.83853500  | 2.28054200  |
| P  | 1.43030600  | -0.09918600 | 1.17127600  |
| C  | 1.88237100  | 3.85880400  | 3.70408100  |
| H  | 0.51111800  | 3.55075100  | 2.06538400  |
| O  | 0.41738200  | 1.94081300  | 3.26373900  |
| O  | 2.10335500  | -0.44659700 | 2.45676800  |
| O  | 2.12547300  | -0.86330400 | -0.16675400 |
| O  | -0.03181200 | -0.45523200 | 0.94060000  |
| H  | 2.59023600  | 3.28979800  | 4.31761400  |
| H  | 2.42709100  | 4.68474800  | 3.23217500  |
| H  | 1.12261200  | 4.28212000  | 4.36645100  |
| H  | 0.99218600  | 1.22419200  | 3.58350100  |
| H  | 0.83764900  | -1.29449900 | -1.31639600 |
| C  | 3.49419900  | -0.84816200 | -0.42415900 |
| C  | 3.91215800  | -0.37809200 | -1.67212100 |
| C  | 4.40803900  | -1.33928600 | 0.51352200  |
| C  | 5.26486600  | -0.40311600 | -1.99789400 |
| H  | 3.17841000  | 0.00615000  | -2.37374000 |

|   |            |             |             |
|---|------------|-------------|-------------|
| C | 5.76276800 | -1.35623600 | 0.19055800  |
| H | 4.05522600 | -1.68734300 | 1.47740700  |
| C | 6.17140800 | -0.89119000 | -1.05865700 |
| H | 5.62626300 | -0.04916300 | -2.95539700 |
| H | 6.50244100 | -1.72916300 | 0.88846300  |
| N | 7.60314200 | -0.91743600 | -1.40023600 |
| O | 7.92706900 | -0.50558800 | -2.51317800 |
| O | 8.38095000 | -1.34907600 | -0.55222300 |

**TS-2b':**

|   |             |             |             |
|---|-------------|-------------|-------------|
| C | 2.20446200  | 2.36590900  | 0.36135500  |
| C | 4.18941200  | 1.05217300  | -0.26058800 |
| C | 3.05595500  | 0.65288200  | 1.90479300  |
| C | 4.46061600  | -0.21544600 | -1.06363700 |
| C | 5.77247900  | -0.56196300 | -1.39885700 |
| C | 5.99989300  | -1.66744700 | -2.21541000 |
| C | 3.63452000  | -2.00952400 | -2.28030700 |
| C | 4.90786400  | -2.40792800 | -2.67153200 |
| C | 3.14285400  | -0.85423800 | 2.08397700  |
| C | 3.84555300  | -1.41829700 | 3.15045800  |
| C | 3.78967100  | -2.79814700 | 3.34493700  |
| C | 2.38113000  | -2.94049000 | 1.41507300  |
| C | 3.03852500  | -3.57727600 | 2.46432500  |
| C | 1.60464000  | 2.53545600  | -1.02210100 |
| C | 1.40992900  | 3.80220100  | -1.57730500 |
| C | 0.76455900  | 3.91341100  | -2.80726600 |
| C | 0.58250600  | 1.52924100  | -2.84554200 |
| C | 0.34057000  | 2.75372400  | -3.45807600 |
| H | 2.86613300  | 3.21375700  | 0.59083200  |
| H | 1.37246700  | 2.38235500  | 1.08142300  |
| H | 5.03926100  | 1.24633300  | 0.40807600  |
| H | 4.16660700  | 1.88249500  | -0.97635900 |
| H | 2.15429300  | 0.99014000  | 2.42725500  |
| H | 3.91819600  | 1.13955900  | 2.38344000  |
| H | 6.60147900  | 0.03160200  | -1.02503600 |
| H | 7.01244100  | -1.94999800 | -2.48749400 |
| H | 5.03778700  | -3.27717100 | -3.30717300 |
| H | 4.41574800  | -0.78379400 | 3.82235600  |
| H | 4.32360200  | -3.25718100 | 4.17167700  |
| H | 2.96318500  | -4.65276900 | 2.58384400  |
| H | 1.75002900  | 4.68422400  | -1.04357400 |
| H | 0.59585100  | 4.88967200  | -3.25175500 |
| H | -0.16554500 | 2.79490100  | -4.41649000 |

|    |             |             |             |
|----|-------------|-------------|-------------|
| Zn | 1.52763000  | -0.42221200 | -0.43972300 |
| H  | 2.75616500  | -2.56701500 | -2.59314500 |
| H  | 1.78488600  | -3.50065500 | 0.70017700  |
| H  | 0.26898900  | 0.60036600  | -3.31339400 |
| N  | 1.20004600  | 1.41778200  | -1.65722500 |
| N  | 3.41122500  | -0.93756200 | -1.49918600 |
| N  | 2.43462000  | -1.61242000 | 1.22760700  |
| N  | 2.91653400  | 1.07086400  | 0.49401200  |
| O  | 0.11365800  | -1.85546300 | -1.31459900 |
| H  | -0.06686500 | -2.18993900 | -2.20148700 |
| H  | -2.99082200 | 1.20143400  | 3.86596100  |
| C  | -2.61898900 | 1.56615900  | 2.90642900  |
| O  | -2.27480900 | 0.37297300  | 2.14803900  |
| C  | -1.37920100 | 2.46871400  | 3.03356500  |
| H  | -3.42778800 | 2.08015000  | 2.37348300  |
| P  | -1.42092900 | 0.51533000  | 0.79817000  |
| C  | -1.77198700 | 3.87723500  | 3.48200400  |
| H  | -0.71748500 | 2.02554500  | 3.79965500  |
| O  | -0.71563300 | 2.44731000  | 1.79810000  |
| O  | -1.84129200 | 1.73987500  | -0.11304900 |
| O  | -2.12233000 | -0.75856300 | -0.06176600 |
| O  | -0.00100600 | -0.02046000 | 0.82906500  |
| H  | -2.42710100 | 4.34919400  | 2.74078400  |
| H  | -2.29228100 | 3.86391200  | 4.44782200  |
| H  | -0.87718100 | 4.49781900  | 3.58706200  |
| H  | -1.44942700 | 2.46550400  | 0.60485300  |
| H  | -0.75366200 | -1.62649800 | -0.89891300 |
| C  | -3.49397100 | -0.88956600 | -0.27045100 |
| C  | -4.16747200 | -1.90403200 | 0.41445900  |
| C  | -4.15543600 | -0.06549100 | -1.18572300 |
| C  | -5.52477600 | -2.10487200 | 0.17998000  |
| H  | -3.62476700 | -2.51807400 | 1.12539100  |
| C  | -5.51421700 | -0.26335500 | -1.41975400 |
| H  | -3.60998600 | 0.72463000  | -1.68851800 |
| C  | -6.17747600 | -1.28017200 | -0.73501200 |
| H  | -6.08118300 | -2.88028800 | 0.69179800  |
| H  | -6.06353100 | 0.35363400  | -2.12020300 |
| N  | -7.61291300 | -1.49150400 | -0.98795300 |
| O  | -8.16976400 | -2.39701700 | -0.37040600 |
| O  | -8.16016500 | -0.74874600 | -1.80073000 |

**3b':**

|   |            |            |             |
|---|------------|------------|-------------|
| C | 2.63437300 | 2.27543600 | -0.69335400 |
|---|------------|------------|-------------|



|    |             |             |             |
|----|-------------|-------------|-------------|
| C  | 4.30694700  | 0.47882000  | -0.70503700 |
| C  | 3.29359300  | 1.21734700  | 1.42642000  |
| C  | 4.30938400  | -1.03724200 | -0.84098500 |
| C  | 5.51464900  | -1.73790500 | -0.93078400 |
| C  | 5.48743800  | -3.11382900 | -1.15240100 |
| C  | 3.09898000  | -2.98862000 | -1.14932600 |
| C  | 4.25382200  | -3.75581600 | -1.26799500 |
| C  | 3.08347800  | -0.06231500 | 2.22205700  |
| C  | 3.75686600  | -0.29043200 | 3.42319700  |
| C  | 3.43375200  | -1.42008600 | 4.17564000  |
| C  | 1.83858400  | -2.00148300 | 2.48725900  |
| C  | 2.45152600  | -2.29141100 | 3.70413800  |
| C  | 2.00804900  | 1.97984000  | -2.04558000 |
| C  | 2.04008000  | 2.91559300  | -3.08070500 |
| C  | 1.36675400  | 2.63497400  | -4.26963000 |
| C  | 0.71858000  | 0.53650400  | -3.31981600 |
| C  | 0.68944100  | 1.42186900  | -4.39368900 |
| H  | 3.43392600  | 3.02298000  | -0.80266000 |
| H  | 1.85459500  | 2.70237200  | -0.05368400 |
| H  | 5.22929400  | 0.80501700  | -0.20462800 |
| H  | 4.34307100  | 0.89175400  | -1.72002800 |
| H  | 2.53192100  | 1.93044700  | 1.75971300  |
| H  | 4.27586100  | 1.65181800  | 1.66271900  |
| H  | 6.45861700  | -1.21024200 | -0.83133800 |
| H  | 6.41340500  | -3.67604700 | -1.22764700 |
| H  | 4.18489500  | -4.82511700 | -1.43673700 |
| H  | 4.51294200  | 0.40953100  | 3.76623300  |
| H  | 3.94134400  | -1.61579500 | 5.11553000  |
| H  | 2.16634100  | -3.17711300 | 4.26169500  |
| H  | 2.57781100  | 3.85010000  | -2.95158900 |
| H  | 1.37301500  | 3.35115400  | -5.08582500 |
| H  | 0.15105900  | 1.16376100  | -5.29919300 |
| Zn | 1.37546200  | -0.39755500 | -0.26999600 |
| H  | 2.11614500  | -3.44726600 | -1.20640000 |
| H  | 1.07119900  | -2.64705600 | 2.06942400  |
| H  | 0.20255000  | -0.41785000 | -3.37076000 |
| N  | 1.36338200  | 0.80423900  | -2.17315700 |
| N  | 3.12191400  | -1.66013500 | -0.94766500 |
| N  | 2.15000700  | -0.91466000 | 1.76416800  |
| N  | 3.11742100  | 1.04321400  | -0.03011500 |
| O  | -0.12741800 | -1.87595300 | -0.50032800 |
| H  | -0.32252200 | -2.43576600 | -1.26100700 |
| H  | -2.65203800 | 1.81631900  | 3.70002400  |
| C  | -2.58871900 | 2.22431400  | 2.68831800  |

|   |             |             |             |
|---|-------------|-------------|-------------|
| O | -2.41267500 | 1.12016600  | 1.78463700  |
| C | -1.38140000 | 3.14053800  | 2.47273900  |
| H | -3.52742800 | 2.73349200  | 2.43836500  |
| P | -1.40765700 | 1.39261000  | 0.50980100  |
| C | -1.62466300 | 4.59565600  | 2.83567400  |
| H | -0.52258800 | 2.75136700  | 3.04480700  |
| O | -1.11068400 | 3.00522400  | 1.08146900  |
| O | -1.95712700 | 2.03760000  | -0.89740900 |
| O | -2.00528900 | -0.21523300 | -0.11689700 |
| O | 0.04143400  | 0.88196300  | 0.56054700  |
| H | -2.46299100 | 5.00249200  | 2.26084100  |
| H | -1.85432400 | 4.69127900  | 3.90289500  |
| H | -0.73674900 | 5.19840200  | 2.62376500  |
| H | -1.92454800 | 3.00300500  | -0.79888300 |
| H | -0.95186600 | -1.29147400 | -0.32800600 |
| C | -3.32572800 | -0.59831900 | -0.19703300 |
| C | -3.77163700 | -1.62955900 | 0.64247100  |
| C | -4.19323900 | -0.03129700 | -1.14181100 |
| C | -5.07561500 | -2.10109100 | 0.53883200  |
| H | -3.08834600 | -2.04191000 | 1.37816500  |
| C | -5.50224200 | -0.49416600 | -1.24244700 |
| H | -3.83243000 | 0.76283500  | -1.78381700 |
| C | -5.92647800 | -1.52413200 | -0.40364300 |
| H | -5.44532100 | -2.89656600 | 1.17410800  |
| H | -6.19483800 | -0.07745100 | -1.96364800 |
| N | -7.30433000 | -2.01958400 | -0.51909700 |
| O | -7.64313100 | -2.93905400 | 0.22569700  |
| O | -8.03376000 | -1.48616300 | -1.35441400 |

**1b”:**

|    |             |             |             |
|----|-------------|-------------|-------------|
| Zn | -1.69247000 | -0.10201800 | 0.36202300  |
| N  | -2.46962200 | 1.91525700  | -0.07565900 |
| N  | -3.70285900 | -0.80052000 | 1.10463300  |
| N  | -1.34117700 | -2.28084700 | -0.07984900 |
| N  | -2.82828900 | -0.41182400 | -1.58489600 |
| H  | -0.57147600 | -2.88439100 | 1.74100600  |
| H  | -3.31169000 | -0.75343400 | 3.13432600  |
| H  | -2.15213200 | 2.78872200  | 1.76998400  |
| O  | -0.79467900 | 0.18887700  | 2.26042300  |
| H  | -0.80570700 | -0.29391900 | 3.09383100  |
| H  | 0.16925100  | 0.49019100  | 2.06087000  |
| P  | 1.43501900  | 0.70212900  | -0.10122900 |
| O  | 1.46514600  | 0.93138200  | 1.41206900  |

|   |             |             |             |
|---|-------------|-------------|-------------|
| O | 0.05846600  | 0.37397300  | -0.67424100 |
| O | 2.13918900  | 1.91359700  | -0.88757600 |
| C | 1.52890100  | 3.21558700  | -1.07821800 |
| H | 2.06376300  | 3.64615100  | -1.92919500 |
| H | 0.47569000  | 3.08206900  | -1.34599300 |
| C | 1.64559000  | 4.13387900  | 0.14298000  |
| H | 1.23959700  | 5.10214600  | -0.17959700 |
| C | 3.08605400  | 4.32778700  | 0.61893000  |
| H | 3.52340000  | 3.37889100  | 0.94403900  |
| H | 3.71429100  | 4.73269800  | -0.18211800 |
| H | 3.10554000  | 5.02589500  | 1.46000700  |
| O | 0.78369900  | 3.70695700  | 1.19843600  |
| H | 1.13247400  | 2.87109800  | 1.55915600  |
| O | 2.39976800  | -0.52820800 | -0.54207000 |
| C | -2.11542600 | -1.51290600 | -2.26481300 |
| C | -2.67247300 | 0.88668600  | -2.28065800 |
| C | -4.24643400 | -0.72027200 | -1.29617300 |
| C | -1.65429900 | -3.96097500 | -1.75755100 |
| C | -0.87262200 | -3.22280700 | 0.75363900  |
| C | -1.71737200 | -2.63637500 | -1.32219900 |
| C | -1.16616200 | -4.93766800 | -0.88961000 |
| C | -0.76109600 | -4.56264000 | 0.39142000  |
| C | -5.71589200 | -1.88760000 | 0.40001500  |
| C | -4.01590000 | -1.09161200 | 2.37987700  |
| C | -4.54353600 | -1.17752200 | 0.12623200  |
| C | -6.03461600 | -2.19157700 | 1.72148700  |
| C | -5.17150200 | -1.77757900 | 2.73773200  |
| C | -3.44552400 | 3.26444000  | -1.79568900 |
| C | -2.53952400 | 2.95517600  | 0.77038500  |
| C | -2.89865000 | 2.06376000  | -1.34472200 |
| C | -3.52574100 | 4.34449200  | -0.91347000 |
| C | -3.05927200 | 4.19149200  | 0.39107500  |
| C | 3.76325900  | -0.64010600 | -0.29549000 |
| C | 4.52117200  | -1.22332600 | -1.31467300 |
| C | 5.88418800  | -1.42431400 | -1.12722300 |
| C | 6.46284600  | -1.03187000 | 0.07908200  |
| C | 5.71335000  | -0.44931200 | 1.09903900  |
| C | 4.34636000  | -0.25371400 | 0.91600800  |
| N | 7.90392000  | -1.24348300 | 0.28177500  |
| O | 8.38557900  | -0.88342300 | 1.35465400  |
| O | 8.53455100  | -1.76779400 | -0.63486700 |
| H | -3.08952900 | 5.00814100  | 1.10391600  |
| H | -3.94450700 | 5.29050100  | -1.24369300 |
| H | -3.79390200 | 3.35425900  | -2.82026300 |

|   |             |             |             |
|---|-------------|-------------|-------------|
| H | -1.63873800 | 0.93860000  | -2.63727600 |
| H | -3.33369100 | 0.96413700  | -3.15570100 |
| H | -5.38400400 | -1.98449500 | 3.78109100  |
| H | -6.94157600 | -2.74106600 | 1.95517300  |
| H | -6.37064400 | -2.18941300 | -0.41229100 |
| H | -4.83115100 | 0.19282100  | -1.46153700 |
| H | -4.63077500 | -1.46355500 | -2.00760100 |
| H | -2.70064700 | -1.91390400 | -3.10500900 |
| H | -1.18945600 | -1.09488500 | -2.67406300 |
| H | -1.97227400 | -4.21822000 | -2.76340400 |
| H | -1.10244300 | -5.97354200 | -1.20903600 |
| H | -0.36905200 | -5.28779100 | 1.09640300  |
| H | 4.03318700  | -1.51118200 | -2.23978200 |
| H | 6.50204100  | -1.87264000 | -1.89534000 |
| H | 6.20283700  | -0.16298500 | 2.02188800  |
| H | 3.73849400  | 0.18801000  | 1.69683600  |

**TS-2b”:**

|    |             |             |             |
|----|-------------|-------------|-------------|
| Zn | 1.73286600  | -0.00760600 | -0.33983600 |
| N  | 2.61457600  | 1.84263300  | 0.57104800  |
| N  | 3.79003400  | -0.66262100 | -0.94377200 |
| N  | 1.22222800  | -2.19205700 | -0.30394500 |
| N  | 2.61977600  | -0.72829100 | 1.65712100  |
| H  | 0.64450100  | -2.40271700 | -2.27575000 |
| H  | 3.61933700  | -0.23727600 | -2.96070000 |
| H  | 2.67678400  | 3.02005800  | -1.12632300 |
| O  | 0.86526000  | 0.70248400  | -2.03419300 |
| H  | 1.18771400  | 0.64674100  | -2.94047600 |
| H  | -0.39981300 | 0.33323900  | -1.88343500 |
| P  | -1.45503900 | 0.49619700  | 0.02742300  |
| O  | -1.39664100 | 0.04877100  | -1.46292500 |
| O  | -0.11654200 | 0.38916200  | 0.73486400  |
| O  | -2.09480500 | 1.95675900  | 0.16536400  |
| C  | -1.28810500 | 3.16470700  | 0.17565400  |
| H  | -1.73542500 | 3.80510000  | 0.94118700  |
| H  | -0.27091400 | 2.90920300  | 0.49086400  |
| C  | -1.28430200 | 3.90257200  | -1.16476000 |
| H  | -0.66422600 | 4.79976100  | -0.98200900 |
| C  | -2.67370000 | 4.34873600  | -1.60807000 |
| H  | -3.32890600 | 3.48340800  | -1.73852800 |
| H  | -3.12030200 | 5.02520200  | -0.87183600 |
| H  | -2.60216600 | 4.87455200  | -2.56366400 |
| O  | -0.72759500 | 3.14305200  | -2.23146800 |

|   |             |             |             |
|---|-------------|-------------|-------------|
| H | 0.00578100  | 2.56810800  | -1.95412800 |
| O | -2.52902100 | -0.42856200 | 0.78403700  |
| C | 1.76506000  | -1.86950700 | 2.04937300  |
| C | 2.45577600  | 0.43737900  | 2.55426800  |
| C | 4.04062300  | -1.10325400 | 1.47676500  |
| C | 1.28538900  | -4.16317200 | 1.05338700  |
| C | 0.82236800  | -2.93647800 | -1.34678700 |
| C | 1.44079800  | -2.78720500 | 0.88330500  |
| C | 0.87048800  | -4.93659000 | -0.03173700 |
| C | 0.62804700  | -4.31288000 | -1.25533600 |
| C | 5.74935500  | -1.83594100 | -0.23165500 |
| C | 4.25318700  | -0.69567800 | -2.20714100 |
| C | 4.52374200  | -1.21636500 | 0.03424400  |
| C | 6.22783900  | -1.86597800 | -1.53855400 |
| C | 5.46652300  | -1.27902800 | -2.55187700 |
| C | 3.50195900  | 2.76240100  | 2.59603500  |
| C | 2.92274700  | 2.98262300  | -0.06867200 |
| C | 2.89498300  | 1.72730900  | 1.88284500  |
| C | 3.81292400  | 3.95026200  | 1.93308100  |
| C | 3.51932700  | 4.06535800  | 0.57380500  |
| C | -3.90361800 | -0.49665900 | 0.55143600  |
| C | -4.68741600 | -0.80942800 | 1.66352000  |
| C | -6.06388000 | -0.93785400 | 1.51266800  |
| C | -6.62318800 | -0.74585300 | 0.25021300  |
| C | -5.84372600 | -0.43464000 | -0.86157200 |
| C | -4.46376400 | -0.31172600 | -0.71487600 |
| N | -8.07964500 | -0.87989900 | 0.08699100  |
| O | -8.54302200 | -0.69888700 | -1.03730100 |
| O | -8.73876700 | -1.15234100 | 1.08863300  |
| H | 3.74918100  | 4.96907200  | 0.01951700  |
| H | 4.28222100  | 4.77012500  | 2.46862400  |
| H | 3.72188300  | 2.63965200  | 3.65228100  |
| H | 1.38815700  | 0.52392100  | 2.78000500  |
| H | 2.99269600  | 0.30246900  | 3.50447600  |
| H | 5.80053900  | -1.27843700 | -3.58383200 |
| H | 7.17781500  | -2.34090900 | -1.76471400 |
| H | 6.31882600  | -2.28334800 | 0.57802300  |
| H | 4.66470900  | -0.34617900 | 1.96743100  |
| H | 4.25029500  | -2.04823200 | 1.99514000  |
| H | 2.21219600  | -2.44479200 | 2.87294500  |
| H | 0.81741300  | -1.45469400 | 2.40821100  |
| H | 1.47481400  | -4.61736500 | 2.02132100  |
| H | 0.73720500  | -6.00863300 | 0.07863100  |
| H | 0.29648700  | -4.87539300 | -2.12146200 |

|   |             |             |             |
|---|-------------|-------------|-------------|
| H | -4.21243300 | -0.94737500 | 2.62892300  |
| H | -6.70568500 | -1.17859000 | 2.35102500  |
| H | -6.31944400 | -0.29756600 | -1.82484800 |
| H | -3.83599300 | -0.08440300 | -1.56875700 |

**3b”:**

|    |             |             |             |
|----|-------------|-------------|-------------|
| Zn | -1.91299800 | 0.23937400  | 0.41118500  |
| N  | -2.33251800 | 2.26578300  | -0.41029400 |
| N  | -4.13136900 | -0.40070000 | 0.46141700  |
| N  | -1.58532200 | -1.94787300 | 0.10738100  |
| N  | -2.46215600 | -0.10360500 | -1.84248600 |
| H  | -1.33682800 | -2.41472600 | 2.10087400  |
| H  | -4.33218100 | -0.47431700 | 2.51607800  |
| H  | -2.56842500 | 3.21221500  | 1.40687500  |
| O  | -1.54662600 | 0.53482100  | 2.33969900  |
| H  | -2.25277500 | 0.64813700  | 2.98382100  |
| H  | 1.39156700  | -0.68437200 | 2.08343000  |
| P  | 1.53115200  | 0.31600400  | 0.21818500  |
| O  | 1.71409100  | -0.95471100 | 1.13665200  |
| O  | 0.14174000  | 0.54782200  | -0.30797700 |
| O  | 2.14779600  | 1.57392100  | 0.99705100  |
| C  | 1.44805000  | 2.22588200  | 2.09679900  |
| H  | 1.96957500  | 3.17608600  | 2.23317300  |
| H  | 0.41562100  | 2.41663300  | 1.79087900  |
| C  | 1.47749200  | 1.40374500  | 3.39211200  |
| H  | 0.92498800  | 1.99771900  | 4.13588500  |
| C  | 2.88300200  | 1.12668900  | 3.91289400  |
| H  | 3.47148500  | 0.56221500  | 3.18395400  |
| H  | 3.40739600  | 2.06426500  | 4.12412100  |
| H  | 2.82665300  | 0.54580900  | 4.83700800  |
| O  | 0.79728900  | 0.15142500  | 3.21570300  |
| H  | -0.18903300 | 0.31206600  | 2.95499400  |
| O  | 2.52462000  | 0.12111200  | -1.02378300 |
| C  | -1.74362200 | -1.32710100 | -2.24953000 |
| C  | -1.95717700 | 1.10783200  | -2.52310200 |
| C  | -3.93093800 | -0.21935100 | -1.97068700 |
| C  | -1.61807700 | -3.74575400 | -1.46977300 |
| C  | -1.41176300 | -2.83328800 | 1.10117700  |
| C  | -1.67808400 | -2.38607800 | -1.15948200 |
| C  | -1.43602400 | -4.66722000 | -0.43792500 |
| C  | -1.32502500 | -4.20469900 | 0.87348100  |
| C  | -5.83231400 | -1.46543000 | -0.84759500 |
| C  | -4.79198100 | -0.75922700 | 1.57419100  |

|   |             |             |             |
|---|-------------|-------------|-------------|
| C | -4.64345000 | -0.74100500 | -0.73407200 |
| C | -6.51882800 | -1.82903700 | 0.31022200  |
| C | -5.99265700 | -1.46423500 | 1.54955100  |
| C | -2.53626300 | 3.58618400  | -2.39533900 |
| C | -2.56869800 | 3.36014700  | 0.33057200  |
| C | -2.30851400 | 2.36876500  | -1.75140900 |
| C | -2.77713200 | 4.72449300  | -1.62572100 |
| C | -2.79339300 | 4.61286400  | -0.23493800 |
| C | 3.91158800  | -0.06361900 | -0.91176000 |
| C | 4.74053900  | 1.00987400  | -1.23455000 |
| C | 6.12103100  | 0.83272800  | -1.19482100 |
| C | 6.62815400  | -0.41455800 | -0.83491400 |
| C | 5.80065400  | -1.49000300 | -0.51763400 |
| C | 4.41946900  | -1.31373400 | -0.55872500 |
| N | 8.08972200  | -0.60360100 | -0.79168400 |
| O | 8.50652100  | -1.71498800 | -0.47330200 |
| O | 8.79289600  | 0.36317700  | -1.07629300 |
| H | -2.97952500 | 5.47317600  | 0.39905900  |
| H | -2.95393000 | 5.68262800  | -2.10534500 |
| H | -2.52056500 | 3.63942100  | -3.47981100 |
| H | -0.86629300 | 1.03190400  | -2.55939600 |
| H | -2.32469200 | 1.18406500  | -3.55746300 |
| H | -6.49188200 | -1.72582600 | 2.47643700  |
| H | -7.44600700 | -2.39066100 | 0.24537700  |
| H | -6.21455000 | -1.73418900 | -1.82795300 |
| H | -4.32657100 | 0.78456800  | -2.16530500 |
| H | -4.19928800 | -0.83390000 | -2.84195000 |
| H | -2.17107600 | -1.75889400 | -3.16660800 |
| H | -0.71241300 | -1.03808600 | -2.47826800 |
| H | -1.70333400 | -4.07427300 | -2.50140100 |
| H | -1.38195900 | -5.72973600 | -0.65607900 |
| H | -1.17716700 | -4.88728000 | 1.70348600  |
| H | 4.30365200  | 1.96332800  | -1.51079900 |
| H | 6.80348500  | 1.63799500  | -1.43666700 |
| H | 6.24172500  | -2.44155700 | -0.24784900 |
| H | 3.74367000  | -2.12552300 | -0.31533100 |

**TS-4b”:**

|    |            |             |             |
|----|------------|-------------|-------------|
| Zn | 1.90229200 | -0.12898700 | 0.41173700  |
| N  | 2.44319200 | -1.98394600 | -0.70493000 |
| N  | 4.04474600 | 0.47776800  | 0.25048000  |
| N  | 1.43565000 | 2.08390200  | 0.54316800  |
| N  | 2.01793300 | 0.57979200  | -1.75694000 |

|   |              |              |              |
|---|--------------|--------------|--------------|
| H | 1. 70227100  | 2. 38878200  | 2. 57001100  |
| H | 4. 61893800  | -0. 01446200 | 2. 17637700  |
| H | 3. 04665800  | -3. 14398200 | 0. 89124500  |
| O | 1. 80965400  | -0. 89358100 | 2. 35379000  |
| H | 2. 22448200  | -0. 58006900 | 3. 16491500  |
| H | -1. 57603100 | 0. 66015500  | 2. 58032400  |
| P | -1. 45621900 | -0. 49454700 | 0. 80280000  |
| O | -1. 89308700 | 0. 80950500  | 1. 67333300  |
| O | -0. 08270900 | -0. 54970700 | 0. 14491800  |
| O | -2. 32625200 | -1. 85287400 | 0. 98493400  |
| C | -1. 87119300 | -2. 88994100 | 1. 86889100  |
| H | -2. 74326600 | -3. 50741800 | 2. 09469300  |
| H | -1. 12538700 | -3. 49211400 | 1. 33800300  |
| C | -1. 26492200 | -2. 21610400 | 3. 10882900  |
| H | -0. 50618000 | -2. 88299900 | 3. 54269200  |
| C | -2. 30264500 | -1. 86448700 | 4. 17558700  |
| H | -3. 11425500 | -1. 26212900 | 3. 75302800  |
| H | -2. 74180800 | -2. 77175300 | 4. 60543500  |
| H | -1. 83451300 | -1. 29752700 | 4. 98639100  |
| O | -0. 63133700 | -1. 05286700 | 2. 59601000  |
| H | 0. 75384000  | -1. 01783800 | 2. 52778900  |
| O | -2. 31262100 | -0. 00703300 | -0. 54739500 |
| C | 1. 01651300  | 1. 66684900  | -1. 82533300 |
| C | 1. 60848900  | -0. 61023300 | -2. 53593100 |
| C | 3. 38838500  | 1. 03453800  | -2. 07903400 |
| C | 0. 81446300  | 3. 97807700  | -0. 78474700 |
| C | 1. 44567900  | 2. 87083300  | 1. 63054100  |
| C | 1. 11798000  | 2. 62191800  | -0. 64934100 |
| C | 0. 82109300  | 4. 79162100  | 0. 34798000  |
| C | 1. 14125400  | 4. 22839700  | 1. 58357300  |
| C | 5. 70612100  | 1. 44051800  | -1. 17477700 |
| C | 4. 95971600  | 0. 41058900  | 1. 23667100  |
| C | 4. 40546000  | 0. 97896800  | -0. 94031800 |
| C | 6. 64821800  | 1. 37475700  | -0. 15356300 |
| C | 6. 26961200  | 0. 84518400  | 1. 08309300  |
| C | 2. 61686300  | -2. 92245900 | -2. 89956600 |
| C | 2. 94026300  | -3. 11914100 | -0. 18967100 |
| C | 2. 27293500  | -1. 88149800 | -2. 03589500 |
| C | 3. 13156100  | -4. 10362400 | -2. 36413600 |
| C | 3. 29458700  | -4. 20828800 | -0. 98248000 |
| C | -3. 68666500 | 0. 10915200  | -0. 63123100 |
| C | -4. 40760500 | -0. 90582700 | -1. 27124100 |
| C | -5. 78129900 | -0. 77462900 | -1. 44548200 |
| C | -6. 41278800 | 0. 37693500  | -0. 97629800 |



|   |             |             |             |
|---|-------------|-------------|-------------|
| C | -5.70647500 | 1.39753100  | -0.34117800 |
| C | -4.33168300 | 1.26263300  | -0.16908700 |
| N | -7.86359600 | 0.52107000  | -1.16178300 |
| O | -8.39184000 | 1.55036200  | -0.74257400 |
| O | -8.45926300 | -0.39630600 | -1.72526300 |
| H | 3.68930400  | -5.11011400 | -0.52678300 |
| H | 3.40225500  | -4.92842400 | -3.01663100 |
| H | 2.47548500  | -2.81110000 | -3.97038600 |
| H | 0.52850300  | -0.72790700 | -2.40009500 |
| H | 1.80092900  | -0.47859200 | -3.61061100 |
| H | 6.97175900  | 0.77065400  | 1.90648100  |
| H | 7.66180900  | 1.72827300  | -0.31729600 |
| H | 5.97089600  | 1.84314100  | -2.14852900 |
| H | 3.78392200  | 0.43069000  | -2.90551700 |
| H | 3.35381400  | 2.06554600  | -2.45351300 |
| H | 1.08789400  | 2.22348000  | -2.77105900 |
| H | 0.02652800  | 1.20056400  | -1.78220800 |
| H | 0.56749000  | 4.38432900  | -1.76093400 |
| H | 0.58126400  | 5.84756400  | 0.26657800  |
| H | 1.15700200  | 4.82388800  | 2.49010100  |
| H | -3.88140900 | -1.78738800 | -1.62104300 |
| H | -6.36759100 | -1.54215500 | -1.93542900 |
| H | -6.23680100 | 2.27694300  | 0.00299800  |
| H | -3.75261700 | 2.03603200  | 0.32173400  |

**5b”:**

|    |             |             |             |
|----|-------------|-------------|-------------|
| Zn | 1.91630000  | -0.22660800 | 0.39401200  |
| N  | 2.34106500  | -2.18046300 | -0.58372800 |
| N  | 4.06594300  | 0.37417700  | 0.15115800  |
| N  | 1.54838300  | 2.01703500  | 0.36657900  |
| N  | 1.99348100  | 0.29722600  | -1.81811500 |
| H  | 1.83603800  | 2.44655700  | 2.36638400  |
| H  | 4.68228600  | 0.10225800  | 2.10587300  |
| H  | 3.00043500  | -3.23698800 | 1.06321900  |
| O  | 1.84482100  | -0.71191000 | 2.44337600  |
| H  | 2.28472600  | -0.32315400 | 3.20725200  |
| H  | -1.47003800 | 1.06841700  | 2.46665900  |
| P  | -1.42366100 | -0.38937600 | 0.91366400  |
| O  | -1.78490100 | 1.07082900  | 1.54827400  |
| O  | -0.06912700 | -0.62354000 | 0.24762900  |
| O  | -2.38766700 | -1.64964900 | 1.27823100  |
| C  | -2.01198700 | -2.55010400 | 2.32993000  |
| H  | -2.92873100 | -3.04061900 | 2.66447100  |

|   |             |             |             |
|---|-------------|-------------|-------------|
| H | -1.32750100 | -3.29954200 | 1.91646600  |
| C | -1.33285500 | -1.71853700 | 3.42829500  |
| H | -0.60877700 | -2.34850200 | 3.96319800  |
| C | -2.31684900 | -1.11121500 | 4.42872300  |
| H | -3.09794500 | -0.53760400 | 3.91782000  |
| H | -2.80381100 | -1.89591900 | 5.01846100  |
| H | -1.79111900 | -0.44530700 | 5.12041300  |
| O | -0.62958400 | -0.71165500 | 2.70909800  |
| H | 0.80845600  | -0.76363100 | 2.63850200  |
| O | -2.26417900 | -0.06476400 | -0.50614100 |
| C | 1.09073300  | 1.45857600  | -1.96460400 |
| C | 1.45686200  | -0.91711800 | -2.47486500 |
| C | 3.38988200  | 0.58062900  | -2.21477600 |
| C | 1.06420200  | 3.84872900  | -1.09823600 |
| C | 1.61476600  | 2.87791400  | 1.39382700  |
| C | 1.26975400  | 2.48777700  | -0.86271300 |
| C | 1.13003000  | 4.73998100  | -0.02772000 |
| C | 1.40794700  | 4.24676900  | 1.24745100  |
| C | 5.56720900  | 1.51040700  | -1.32539000 |
| C | 4.96579700  | 0.51319300  | 1.14096600  |
| C | 4.36030000  | 0.85227400  | -1.07003900 |
| C | 6.49637800  | 1.65452100  | -0.29790100 |
| C | 6.19517100  | 1.13826200  | 0.96391700  |
| C | 2.27081300  | -3.32155700 | -2.68653300 |
| C | 2.80602400  | -3.29831800 | -0.00391100 |
| C | 2.06754800  | -2.18514800 | -1.90211700 |
| C | 2.75071600  | -4.48421200 | -2.08305000 |
| C | 3.02266700  | -4.47614300 | -0.71465900 |
| C | -3.63024200 | 0.08544600  | -0.62102800 |
| C | -4.36803200 | -0.95783300 | -1.19449200 |
| C | -5.73449300 | -0.80832800 | -1.40468100 |
| C | -6.34533600 | 0.39035400  | -1.03658500 |
| C | -5.62361700 | 1.43945500  | -0.46876600 |
| C | -4.25547300 | 1.28663300  | -0.26202900 |
| N | -7.78816300 | 0.55406500  | -1.25904000 |
| O | -8.29855900 | 1.62337200  | -0.92619700 |
| O | -8.39675300 | -0.38771400 | -1.76610000 |
| H | 3.39627000  | -5.35914600 | -0.20732100 |
| H | 2.91206900  | -5.38129600 | -2.67336100 |
| H | 2.04944700  | -3.29569500 | -3.74925200 |
| H | 0.38138600  | -0.94434300 | -2.27167300 |
| H | 1.59667700  | -0.88749600 | -3.56523500 |
| H | 6.89102800  | 1.22211100  | 1.79177600  |
| H | 7.43978200  | 2.16123100  | -0.47793200 |

|   |             |             |             |
|---|-------------|-------------|-------------|
| H | 5.77457200  | 1.89716900  | -2.31892900 |
| H | 3.77515400  | -0.29384800 | -2.75335300 |
| H | 3.42587200  | 1.41691500  | -2.92582900 |
| H | 1.20531800  | 1.93563400  | -2.94890800 |
| H | 0.06400300  | 1.08289300  | -1.89322700 |
| H | 0.84596800  | 4.19950000  | -2.10239700 |
| H | 0.96708300  | 5.80171100  | -0.18696400 |
| H | 1.46568400  | 4.90406500  | 2.10846800  |
| H | -3.85845000 | -1.87666200 | -1.46433800 |
| H | -6.33144800 | -1.59744600 | -1.84495700 |
| H | -6.13715400 | 2.35549400  | -0.20357200 |
| H | -3.66624000 | 2.08363900  | 0.17553400  |

**TS-6b”:**

|    |             |             |             |
|----|-------------|-------------|-------------|
| Zn | 1.71228700  | 0.00545400  | -0.48888200 |
| N  | 3.23160400  | 1.44189800  | 0.35223800  |
| N  | 3.36379000  | -1.47932600 | -0.75951300 |
| N  | 0.41773000  | -1.82368000 | -0.39567700 |
| N  | 1.99357100  | -0.68642300 | 1.63120900  |
| H  | 0.06836300  | -2.13072700 | -2.40955100 |
| H  | 3.63315900  | -1.31660000 | -2.80271400 |
| H  | 4.00285200  | 2.22071700  | -1.39877700 |
| O  | 1.56957600  | 0.59457700  | -2.63633000 |
| H  | 1.45259600  | 0.11664700  | -3.46724400 |
| H  | -1.59088100 | 2.23315000  | -2.63128700 |
| P  | -1.08931900 | 1.83984500  | -0.56925900 |
| O  | -1.55939200 | 1.40928800  | -2.11886100 |
| O  | 0.39490200  | 1.50944500  | -0.29314700 |
| O  | -2.01530900 | 2.49764400  | 0.63521600  |
| C  | -1.92949100 | 3.91749900  | 0.79961000  |
| H  | -2.89397600 | 4.26227200  | 1.18058700  |
| H  | -1.14688800 | 4.13833100  | 1.53487700  |
| C  | -1.58257000 | 4.48858400  | -0.58396500 |
| H  | -0.92685400 | 5.36086400  | -0.47943500 |
| C  | -2.80946300 | 4.86343800  | -1.41558200 |
| H  | -3.51314100 | 4.02558500  | -1.48050800 |
| H  | -3.33448300 | 5.71468500  | -0.96747600 |
| H  | -2.50806300 | 5.14732200  | -2.42872100 |
| O  | -0.82936200 | 3.45116500  | -1.20119400 |
| H  | 0.80091000  | 1.18728200  | -2.54151100 |
| O  | -1.66649900 | 0.29062700  | -0.02123400 |
| C  | 0.71524400  | -1.34610100 | 1.97406700  |
| C  | 2.21375500  | 0.56657300  | 2.38769400  |

|   |             |             |             |
|---|-------------|-------------|-------------|
| C | 3.15914700  | -1.59776700 | 1.70202200  |
| C | -0.51636900 | -3.40750000 | 1.13894900  |
| C | -0.11066100 | -2.52107800 | -1.41195300 |
| C | 0.21070000  | -2.24906800 | 0.86362100  |
| C | -1.06418300 | -4.13107300 | 0.07976100  |
| C | -0.86290700 | -3.67736100 | -1.22359200 |
| C | 4.47229200  | -3.28405200 | 0.35401800  |
| C | 3.89088600  | -1.89958300 | -1.92319200 |
| C | 3.65625700  | -2.14891800 | 0.36900200  |
| C | 5.01375100  | -3.71906700 | -0.85323400 |
| C | 4.72539700  | -3.00745300 | -2.01936200 |
| C | 4.05857900  | 2.32172000  | 2.42057900  |
| C | 4.04565900  | 2.27424600  | -0.31469000 |
| C | 3.22586400  | 1.46673100  | 1.69754500  |
| C | 4.90262800  | 3.18853100  | 1.72583000  |
| C | 4.89612000  | 3.16837400  | 0.33115300  |
| C | -2.97800400 | -0.07660800 | 0.09666300  |
| C | -3.52718200 | -0.20665700 | 1.38311900  |
| C | -4.82591200 | -0.67149400 | 1.55091800  |
| C | -5.57521300 | -1.00209800 | 0.42110300  |
| C | -5.05324100 | -0.87391400 | -0.86585100 |
| C | -3.75040700 | -0.41222300 | -1.02820800 |
| N | -6.94263800 | -1.50407000 | 0.59267700  |
| O | -7.57860600 | -1.78821400 | -0.42256500 |
| O | -7.36962900 | -1.61568500 | 1.74229400  |
| H | 5.53510600  | 3.82764200  | -0.24649200 |
| H | 5.55635300  | 3.86690500  | 2.26590800  |
| H | 4.03970600  | 2.31254200  | 3.50630700  |
| H | 1.25635700  | 1.09782800  | 2.42105400  |
| H | 2.52255400  | 0.36902600  | 3.42448200  |
| H | 5.13108800  | -3.30539900 | -2.98020300 |
| H | 5.65063200  | -4.59799900 | -0.88429600 |
| H | 4.68324200  | -3.81330100 | 1.27871400  |
| H | 3.99588800  | -1.04701700 | 2.14848700  |
| H | 2.94760700  | -2.43429300 | 2.38110200  |
| H | 0.78986100  | -1.90523500 | 2.91793800  |
| H | -0.03425000 | -0.55815300 | 2.10765600  |
| H | -0.66230200 | -3.72713700 | 2.16628300  |
| H | -1.64211700 | -5.03043800 | 0.26979200  |
| H | -1.27813200 | -4.20355500 | -2.07636000 |
| H | -2.92460400 | 0.07743600  | 2.23973000  |
| H | -5.27025000 | -0.77730200 | 2.53311200  |
| H | -5.66853100 | -1.14117000 | -1.71656700 |
| H | -3.31854600 | -0.30284900 | -2.01564700 |

**7b”:**

|    |             |             |             |
|----|-------------|-------------|-------------|
| Zn | 1.40941500  | -0.10983800 | -0.30875500 |
| N  | 2.77974800  | 1.60873200  | -0.80365100 |
| N  | 2.94545100  | -1.50780400 | -1.15969400 |
| N  | 0.80503400  | -1.92762600 | 0.89368500  |
| N  | 2.94951000  | -0.15076400 | 1.34906400  |
| H  | -0.49793200 | -2.84401800 | -0.42488700 |
| H  | 2.02245800  | -1.90761700 | -2.96470300 |
| H  | 2.31496100  | 1.87866600  | -2.79802000 |
| O  | 0.28422800  | 0.02348300  | -2.18072300 |
| H  | -0.34807100 | -0.68978000 | -2.34500400 |
| H  | -1.01153600 | 2.99951000  | -1.34533100 |
| P  | -1.17156300 | 1.67416300  | 0.38271200  |
| O  | -1.24844700 | 2.05993900  | -1.27186100 |
| O  | 0.21531900  | 1.12935500  | 0.77326100  |
| O  | -2.40197500 | 1.73137700  | 1.47773700  |
| C  | -2.45300600 | 2.89996400  | 2.30608700  |
| H  | -3.50217300 | 3.08201300  | 2.55003400  |
| H  | -1.89293700 | 2.69973900  | 3.22635400  |
| C  | -1.81368200 | 4.03041500  | 1.48419200  |
| H  | -1.26157300 | 4.71124600  | 2.14182300  |
| C  | -2.81516600 | 4.82318900  | 0.64549300  |
| H  | -3.42891600 | 4.15871400  | 0.02717200  |
| H  | -3.48506600 | 5.40045300  | 1.29261400  |
| H  | -2.28970700 | 5.52495100  | -0.00955700 |
| O  | -0.85818700 | 3.35619100  | 0.66773200  |
| H  | -0.29822500 | 0.81444400  | -2.02767500 |
| O  | -1.79577800 | 0.09947500  | -0.08036900 |
| C  | 2.23430900  | -0.75693100 | 2.49007100  |
| C  | 3.25284900  | 1.28295400  | 1.56559700  |
| C  | 4.13617000  | -0.92405200 | 0.92100100  |
| C  | 1.23154600  | -3.04258100 | 2.97099000  |
| C  | -0.01396800 | -2.93088800 | 0.54325400  |
| C  | 1.41440200  | -1.97266700 | 2.09311200  |
| C  | 0.38089700  | -4.08480300 | 2.60265300  |
| C  | -0.25924500 | -4.02836600 | 1.36474800  |
| C  | 4.83384900  | -2.85034300 | -0.56377500 |
| C  | 2.83123400  | -2.20581800 | -2.30384000 |
| C  | 3.93756900  | -1.80923300 | -0.30527900 |
| C  | 4.70963500  | -3.57758300 | -1.74556700 |
| C  | 3.69221500  | -3.24450100 | -2.64189300 |
| C  | 4.42453300  | 3.05690200  | 0.16142900  |

|   |             |             |             |
|---|-------------|-------------|-------------|
| C | 2.92448700  | 2.24521500  | -1.97669800 |
| C | 3.51346300  | 2.00382400  | 0.25376300  |
| C | 4.56496300  | 3.72573000  | -1.05490200 |
| C | 3.80171100  | 3.31362500  | -2.14735400 |
| C | -3.10740600 | -0.22608200 | -0.28413900 |
| C | -3.61110400 | -1.33652800 | 0.41329800  |
| C | -4.91170700 | -1.77425500 | 0.19741600  |
| C | -5.71222800 | -1.08804700 | -0.71612300 |
| C | -5.23560800 | 0.02105300  | -1.41415100 |
| C | -3.92925100 | 0.45179200  | -1.20147600 |
| N | -7.08564800 | -1.54634300 | -0.94867700 |
| O | -7.77102400 | -0.91236600 | -1.75073700 |
| O | -7.46754400 | -2.53937400 | -0.32858100 |
| H | 3.88485400  | 3.80284200  | -3.11197500 |
| H | 5.26392200  | 4.55146900  | -1.14880500 |
| H | 5.00844800  | 3.34962700  | 1.02886000  |
| H | 2.36603300  | 1.73431800  | 2.02231600  |
| H | 4.10133700  | 1.42191000  | 2.25122900  |
| H | 3.56448700  | -3.77826800 | -3.57753500 |
| H | 5.39628100  | -4.38977400 | -1.96480900 |
| H | 5.62040900  | -3.07991000 | 0.14921700  |
| H | 4.93368200  | -0.21332700 | 0.67265900  |
| H | 4.51729000  | -1.53332900 | 1.75145200  |
| H | 2.92307800  | -1.01628100 | 3.30755000  |
| H | 1.53537700  | -0.00299600 | 2.86771700  |
| H | 1.74147600  | -3.05203100 | 3.92956900  |
| H | 0.22083900  | -4.92545500 | 3.27112300  |
| H | -0.93307200 | -4.81360100 | 1.03909100  |
| H | -2.96765900 | -1.83454900 | 1.13149900  |
| H | -5.32067300 | -2.62597900 | 0.72716900  |
| H | -5.88807000 | 0.52553400  | -2.11665700 |
| H | -3.53850100 | 1.30424000  | -1.74472300 |

**(3) geometries of species in Gao's mechanism:  
1 in ref41(B3LYP/our basis set):**

|    |            |             |             |
|----|------------|-------------|-------------|
| Zn | 1.65092800 | 0.10723700  | -0.12636400 |
| O  | 1.22736100 | 0.76759900  | -1.96708600 |
| H  | 0.31797700 | 0.56107900  | -2.22649100 |
| N  | 2.72913900 | -0.35771100 | 1.84513600  |
| N  | 1.40780600 | -2.20756700 | 0.06572800  |
| N  | 3.83151600 | -0.47447200 | -0.77382600 |
| N  | 2.11330500 | 2.14067100  | 0.78821000  |
| N  | 1.62023000 | 3.32844400  | -1.13710900 |

|   |             |             |             |
|---|-------------|-------------|-------------|
| H | 1.46638300  | 2.40823900  | -1.61320100 |
| H | 1.75093100  | 4.15863000  | -1.69482200 |
| N | 3.41621600  | -0.35077600 | -3.04834600 |
| H | 3.59136800  | -0.68788300 | -3.98114000 |
| H | 2.49774900  | 0.09334100  | -2.81149000 |
| N | 0.30493000  | -2.58223500 | -1.94410300 |
| H | -0.26993100 | -1.75064000 | -1.77435000 |
| H | -0.11351000 | -3.26249200 | -2.56084200 |
| O | -1.54070500 | -0.37035900 | -1.31528400 |
| O | -0.23841900 | 0.22895000  | 0.87991100  |
| O | -1.95298600 | 1.83833100  | -0.02776800 |
| P | -1.50419200 | 0.27632900  | 0.05016900  |
| O | -2.64858400 | -0.38818200 | 1.06193700  |
| C | -2.90718200 | 2.33450400  | -0.98858200 |
| C | -2.62750800 | 3.82101400  | -1.19069100 |
| C | -3.65852600 | 4.45721100  | -2.11653000 |
| O | -1.34522800 | 4.03291700  | -1.77361500 |
| H | -0.66543800 | 3.58939200  | -1.23907400 |
| H | -2.67077800 | 4.30819500  | -0.20287100 |
| H | -3.64488200 | 3.97243200  | -3.09878900 |
| H | -3.42490300 | 5.51613800  | -2.25840600 |
| H | -4.66723200 | 4.37744800  | -1.69752900 |
| H | -2.79900500 | 1.79161700  | -1.93351700 |
| H | -3.92085500 | 2.19004800  | -0.59510100 |
| C | 2.22742600  | -1.67247700 | 2.28686100  |
| C | 2.32080800  | 0.73582800  | 2.75213000  |
| C | 4.18939500  | -0.34840300 | 1.61906200  |
| C | 2.43802000  | -3.99642500 | 1.29802000  |
| C | 1.03669200  | -3.07338500 | -0.90000300 |
| C | 2.05163300  | -2.67192100 | 1.15674800  |
| C | 2.12094800  | -4.88768600 | 0.25987800  |
| C | 1.41225800  | -4.43984300 | -0.83639200 |
| C | 5.76854100  | -1.60652400 | 0.09858900  |
| C | 4.19986800  | -0.79441800 | -2.03976200 |
| C | 4.60865000  | -0.86311900 | 0.25553200  |
| C | 6.15017000  | -1.95320900 | -1.20945500 |
| C | 5.38067500  | -1.55094900 | -2.27969900 |
| C | 2.84091900  | 3.21955200  | 2.80677000  |
| C | 2.07450700  | 3.32931700  | 0.14477000  |
| C | 2.45560900  | 2.09597000  | 2.09025300  |
| C | 2.83830700  | 4.45497400  | 2.13685500  |
| C | 2.45357000  | 4.52306600  | 0.81313500  |
| C | -3.95837300 | -0.65910300 | 0.77875000  |
| C | -4.84092100 | -0.61832600 | 1.87040400  |

|   |             |             |             |
|---|-------------|-------------|-------------|
| C | -6.18443600 | -0.91765900 | 1.69286600  |
| C | -6.64049000 | -1.25494200 | 0.41666000  |
| C | -5.77445900 | -1.30259700 | -0.67635100 |
| C | -4.42561800 | -1.00877700 | -0.49970500 |
| N | -8.05605000 | -1.56852200 | 0.22371400  |
| O | -8.43128500 | -1.86079100 | -0.91356400 |
| O | -8.79454300 | -1.52321300 | 1.21002400  |
| H | 1.26178300  | 0.58141100  | 2.98424600  |
| H | 2.88689800  | 0.71529000  | 3.69660200  |
| H | 4.70836500  | -0.90734800 | 2.41267700  |
| H | 4.51988400  | 0.69409200  | 1.69031600  |
| H | 2.87086900  | -2.10028200 | 3.07111200  |
| H | 1.23548800  | -1.50618800 | 2.72077100  |
| H | 6.35999900  | -1.90261900 | 0.95858700  |
| H | 7.05067200  | -2.53814700 | -1.37827800 |
| H | 5.65748200  | -1.80067100 | -3.29986700 |
| H | 2.96104700  | -4.32957200 | 2.18816500  |
| H | 2.41569700  | -5.93158200 | 0.32635800  |
| H | 1.12476600  | -5.11533700 | -1.63672400 |
| H | 3.12389800  | 3.14257800  | 3.85133100  |
| H | 3.13409000  | 5.35976600  | 2.66130400  |
| H | 2.42523100  | 5.46883000  | 0.28039100  |
| H | -3.72955100 | -1.04844100 | -1.32927500 |
| H | -6.16355500 | -1.57474700 | -1.65002500 |
| H | -6.88389200 | -0.89120100 | 2.51927300  |
| H | -4.44939800 | -0.35026700 | 2.84611600  |

**TS-4a in ref41 (B3LYP/our basis set):**

|    |             |             |             |
|----|-------------|-------------|-------------|
| Zn | -1.47960000 | 0.09605800  | 0.02475800  |
| H  | -0.13761000 | 0.93397200  | 2.03924700  |
| O  | -0.98921400 | 0.41288600  | 2.12543000  |
| H  | -0.65299900 | -0.45671500 | 2.42777800  |
| N  | -2.34159900 | -0.88297600 | -1.82267100 |
| N  | -0.40893500 | -2.00564500 | -0.03026300 |
| N  | -3.43663400 | -1.11311700 | 0.84083300  |
| N  | -2.76715900 | 1.71255100  | -0.82453900 |
| H  | -1.57198200 | 2.91729000  | 1.02858600  |
| N  | -2.58919600 | 3.13669200  | 0.98408900  |
| H  | -2.84431000 | 4.02638100  | 1.38869100  |
| N  | -3.51269400 | -0.38469100 | 3.05516500  |
| H  | -3.62755300 | -0.62910400 | 4.02645500  |
| H  | -2.77204100 | 0.27860500  | 2.84187500  |
| N  | 0.73471900  | -1.87210800 | 1.99055700  |
| H  | 1.16119500  | -0.95352500 | 1.70402200  |



|   |             |             |             |
|---|-------------|-------------|-------------|
| H | 1.33542900  | -2.37586300 | 2.63209700  |
| P | 1.32431300  | 1.36025600  | 0.02907400  |
| O | 1.53888700  | 0.68433700  | 1.40675900  |
| O | 0.13011900  | 0.91273400  | -0.85743300 |
| O | 2.45528400  | 0.34171500  | -0.90736500 |
| O | 2.27238100  | 2.63855700  | -0.41614600 |
| C | 1.85442500  | 3.97025100  | -0.11961000 |
| C | 0.89208200  | 3.90193400  | 1.07641200  |
| C | 1.60093000  | 3.94161100  | 2.43781700  |
| O | 0.18473000  | 2.70745800  | 0.86432800  |
| H | 0.19735000  | 4.75782800  | 1.01649400  |
| H | 2.32302600  | 3.12441300  | 2.52254900  |
| H | 2.12232500  | 4.89667600  | 2.58244700  |
| H | 0.86756200  | 3.82531700  | 3.24348200  |
| H | 2.75797600  | 4.55581100  | 0.07967500  |
| H | 1.34640000  | 4.38031200  | -1.00205500 |
| C | -1.29270800 | -1.81804300 | -2.27516200 |
| C | -2.51499400 | 0.26412500  | -2.74311300 |
| C | -3.62744600 | -1.55726700 | -1.55364700 |
| C | -0.52304700 | -4.03627200 | -1.30965300 |
| C | 0.28685000  | -2.64295000 | 0.93131000  |
| C | -0.74864600 | -2.67599200 | -1.14972700 |
| C | 0.11076800  | -4.72579900 | -0.26588800 |
| C | 0.53198100  | -4.03265900 | 0.85425600  |
| C | -4.60067300 | -3.11223300 | 0.16274700  |
| C | -3.82947800 | -1.32643300 | 2.11772800  |
| C | -3.86025000 | -1.97144700 | -0.11274900 |
| C | -4.96005600 | -3.36141600 | 1.49544700  |
| C | -4.59351300 | -2.46486900 | 2.47748500  |
| C | -4.23548900 | 2.13996000  | -2.67318900 |
| C | -3.20362400 | 2.82243400  | -0.19414600 |
| C | -3.22824800 | 1.41384200  | -2.05609600 |
| C | -4.76947600 | 3.24014000  | -1.97978300 |
| C | -4.25635000 | 3.59460800  | -0.74764000 |
| C | 3.74400200  | 0.10454800  | -0.66256200 |
| C | 4.44294600  | -0.63647000 | -1.64739400 |
| C | 5.77728300  | -0.96399900 | -1.48583000 |
| C | 6.44796900  | -0.55276800 | -0.32744200 |
| C | 5.78330700  | 0.18360100  | 0.65852800  |
| C | 4.44483200  | 0.51147600  | 0.49865200  |
| N | 7.84417900  | -0.89854900 | -0.14766000 |
| O | 8.41133900  | -0.52523200 | 0.88643800  |
| O | 8.40266100  | -1.55401300 | -1.03648000 |
| H | -3.75244700 | -2.42465700 | -2.21673200 |

|   |             |             |             |
|---|-------------|-------------|-------------|
| H | -4.42732700 | -0.85005700 | -1.80374500 |
| H | -1.51248100 | 0.60779900  | -3.02010000 |
| H | -3.04826900 | -0.02759000 | -3.66031700 |
| H | -1.65370500 | -2.45236700 | -3.09907900 |
| H | -0.45932800 | -1.21056500 | -2.64526500 |
| H | -0.81650400 | -4.54181500 | -2.22375400 |
| H | 0.29877600  | -5.79273600 | -0.34827700 |
| H | 1.07502700  | -4.52969100 | 1.65244600  |
| H | -4.90408600 | -3.77957900 | -0.63694600 |
| H | -5.53332300 | -4.24774700 | 1.75308300  |
| H | -4.87802700 | -2.61453800 | 3.51471800  |
| H | -4.59034500 | 1.86797300  | -3.66160800 |
| H | -5.56998700 | 3.82675900  | -2.42235000 |
| H | -4.62298200 | 4.46628200  | -0.21393700 |
| H | 3.89889900  | -0.93670600 | -2.53778500 |
| H | 6.31598600  | -1.52907700 | -2.23694100 |
| H | 6.32865200  | 0.48748400  | 1.54427200  |
| H | 3.92149800  | 1.06174600  | 1.26878900  |

**1' in ref 22 (B3LYP/our basis set):**

|    |             |             |             |
|----|-------------|-------------|-------------|
| Zn | 1.63295300  | -0.11489900 | 0.33096800  |
| N  | 2.09484000  | -2.08571600 | -0.73959600 |
| N  | 3.87016700  | 0.18516900  | 0.62976600  |
| N  | 1.67250700  | 2.18390600  | 0.22297500  |
| N  | 2.52914100  | 0.46340500  | -1.83713600 |
| H  | 1.32527400  | 2.49466300  | 2.22837500  |
| H  | 3.69537100  | -0.14791000 | 2.64493300  |
| H  | 1.99995100  | -3.31567700 | 0.91845600  |
| O  | 1.34798800  | -0.46611100 | 2.25414400  |
| H  | 0.65430100  | 0.07809300  | 2.64748800  |
| P  | -1.48869000 | 0.27459800  | 0.21525100  |
| O  | -1.59000300 | 1.62760200  | 0.83689100  |
| O  | -0.25021200 | -0.13643100 | -0.58680800 |
| O  | -1.79628100 | -0.83657200 | 1.36312000  |
| C  | -1.75006700 | -2.25350500 | 1.10106600  |
| H  | -2.78110400 | -2.59760300 | 0.94558800  |
| H  | -1.16503900 | -2.45011100 | 0.19720200  |
| C  | -1.12638600 | -3.00679300 | 2.28429700  |
| H  | -1.33730700 | -4.06926300 | 2.08869400  |
| C  | -1.76325300 | -2.62533700 | 3.62576800  |
| H  | -1.58734400 | -1.56926500 | 3.84983500  |
| H  | -2.84730800 | -2.79190000 | 3.61245700  |
| H  | -1.32454800 | -3.23088800 | 4.42423500  |

|   |             |             |             |
|---|-------------|-------------|-------------|
| O | 0.28762100  | -2.91076400 | 2.32150200  |
| H | 0.60555600  | -1.96116600 | 2.38629000  |
| O | -2.70344500 | -0.01603700 | -0.90227600 |
| C | 1.91105500  | 1.75929000  | -2.15924400 |
| C | 2.02279000  | -0.62817200 | -2.68819000 |
| C | 4.00261900  | 0.50810300  | -1.79115400 |
| C | 1.98630700  | 4.10333500  | -1.17030600 |
| C | 1.51480000  | 2.98889700  | 1.28072400  |
| C | 1.88855400  | 2.72289600  | -0.98608600 |
| C | 1.82592900  | 4.94249100  | -0.06736700 |
| C | 1.57952700  | 4.37770800  | 1.18287900  |
| C | 5.87873300  | 1.17178800  | -0.20553400 |
| C | 4.37296600  | 0.21382800  | 1.87447300  |
| C | 4.59714600  | 0.64748500  | -0.39493900 |
| C | 6.41250800  | 1.19251700  | 1.08259400  |
| C | 5.65086600  | 0.70091400  | 2.14383300  |
| C | 2.62480500  | -3.09507600 | -2.84741200 |
| C | 2.21972600  | -3.28332400 | -0.14488000 |
| C | 2.27994900  | -1.98934600 | -2.06889800 |
| C | 2.76321900  | -4.33922900 | -2.23033400 |
| C | 2.55306400  | -4.43712000 | -0.85681800 |
| C | -4.03958200 | 0.17814900  | -0.69768700 |
| C | -4.89148600 | -0.41205800 | -1.64698200 |
| C | -6.26678500 | -0.26917100 | -1.53660500 |
| C | -6.78767000 | 0.46590700  | -0.46879400 |
| C | -5.95308300 | 1.05897800  | 0.47942900  |
| C | -4.57363900 | 0.92080000  | 0.36886200  |
| N | -8.23513900 | 0.61830800  | -0.34634900 |
| O | -8.66912200 | 1.27231100  | 0.60485400  |
| O | -8.94569000 | 0.08428900  | -1.20234800 |
| H | 2.63914000  | -5.38536500 | -0.33647800 |
| H | 3.02840800  | -5.21530900 | -2.81580700 |
| H | 2.77323700  | -2.98103100 | -3.91738200 |
| H | 0.93792200  | -0.49905300 | -2.76121000 |
| H | 2.44345500  | -0.59219100 | -3.70635600 |
| H | 6.03047100  | 0.70544300  | 3.16042800  |
| H | 7.40700400  | 1.59464900  | 1.25571300  |
| H | 6.44423800  | 1.55506000  | -1.05048800 |
| H | 4.38350900  | -0.43233500 | -2.20854400 |
| H | 4.38996200  | 1.31002100  | -2.43730100 |
| H | 2.39375400  | 2.23539700  | -3.02844500 |
| H | 0.86780100  | 1.55996000  | -2.42647800 |
| H | 2.16986600  | 4.51030400  | -2.16061700 |
| H | 1.88846600  | 6.02071200  | -0.18521700 |

|   |             |             |             |
|---|-------------|-------------|-------------|
| H | 1.43552800  | 4.99362800  | 2.06428600  |
| H | -4.45060600 | -0.97793700 | -2.46130300 |
| H | -6.94175800 | -0.71638600 | -2.25578300 |
| H | -6.39199300 | 1.62632800  | 1.29111600  |
| H | -3.90757600 | 1.39160100  | 1.08212500  |

**TS-4' in ref 22 (B3LYP/our basis set):**

|    |             |             |             |
|----|-------------|-------------|-------------|
| Zn | 1.00082400  | -0.23332700 | -0.42053200 |
| N  | 0.81921200  | -1.55226900 | 1.48143300  |
| N  | 2.91523800  | 0.18731900  | 0.78738000  |
| N  | 2.23356200  | -2.06262600 | -0.93395000 |
| N  | -0.87439000 | -1.65702800 | -0.70754900 |
| H  | -1.07486300 | -1.69016700 | -2.76524800 |
| H  | 2.86531200  | -1.38478700 | -2.77243600 |
| H  | 3.98621700  | 1.15937100  | -0.67686000 |
| O  | 1.03329800  | 0.41513100  | -2.51249600 |
| H  | 0.85164500  | 1.38081200  | -2.31998300 |
| H  | 0.23645500  | 0.16011800  | -2.99712100 |
| P  | -0.26368200 | 2.50635700  | -0.33497200 |
| O  | -0.68605700 | 2.42725400  | -1.80247500 |
| O  | -0.08266900 | 1.16324700  | 0.47452200  |
| O  | 0.09523800  | 3.95917200  | 0.37837600  |
| C  | 1.44104300  | 4.41678600  | 0.36725100  |
| H  | 1.41552100  | 5.50682800  | 0.25946900  |
| H  | 1.90709000  | 4.16442100  | 1.33052300  |
| C  | 2.17159900  | 3.70628600  | -0.78507400 |
| H  | 3.24433000  | 3.63338800  | -0.53211200 |
| C  | 2.03501000  | 4.43017900  | -2.13307100 |
| H  | 0.98178200  | 4.52564300  | -2.41266600 |
| H  | 2.48872100  | 5.42914300  | -2.08940400 |
| H  | 2.54274300  | 3.85816300  | -2.91812300 |
| O  | 1.60269800  | 2.42604400  | -0.78944600 |
| O  | -1.88302900 | 2.82250500  | 0.43708600  |
| C  | -0.64096500 | -1.58152800 | 1.71438500  |
| C  | 1.52511900  | -0.79145000 | 2.52535000  |
| C  | 1.39350000  | -2.88578400 | 1.22942200  |
| C  | -2.60654300 | -2.71434000 | 0.57095200  |
| C  | -1.53468100 | -1.98919000 | -1.82657300 |
| C  | -1.39838000 | -2.02014100 | 0.47658300  |
| C  | -3.30275500 | -3.02957000 | -0.59446700 |
| C  | -2.74764200 | -2.67130300 | -1.82295300 |
| C  | 3.31681900  | -3.98227800 | -0.01130500 |
| C  | 3.02059600  | -2.15135200 | -2.01804500 |

|   |             |             |             |
|---|-------------|-------------|-------------|
| C | 2.36634100  | -2.95937900 | 0.05597400  |
| C | 4.13144600  | -4.07996300 | -1.13796800 |
| C | 3.98047300  | -3.14945000 | -2.16685700 |
| C | 3.92859600  | -0.06085600 | 2.94158100  |
| C | 4.01740200  | 0.81072000  | 0.35060600  |
| C | 2.85707400  | -0.23071200 | 2.06055100  |
| C | 5.08071100  | 0.57807900  | 2.48516400  |
| C | 5.12749800  | 1.02797000  | 1.16515700  |
| C | -2.90930400 | 1.99321400  | 0.36157500  |
| C | -3.71398400 | 1.83192100  | 1.52057900  |
| C | -4.78101700 | 0.95117700  | 1.53531800  |
| C | -5.07742700 | 0.21118400  | 0.38125000  |
| C | -4.33758000 | 0.39950900  | -0.79559100 |
| C | -3.26986000 | 1.27940800  | -0.81231900 |
| N | -6.11880500 | -0.78458800 | 0.41770300  |
| O | -6.25016400 | -1.53519000 | -0.56565500 |
| O | -6.82170200 | -0.87105500 | 1.43312100  |
| H | 0.88996100  | 0.06555300  | 2.77557700  |
| H | 1.66326800  | -1.38971700 | 3.44045300  |
| H | 3.85202700  | -0.41180300 | 3.96666400  |
| H | 5.92628900  | 0.72635100  | 3.15093700  |
| H | 6.00061200  | 1.53852800  | 0.77212200  |
| H | 0.56964700  | -3.57242300 | 1.00085500  |
| H | 1.88296200  | -3.28084200 | 2.13201000  |
| H | 3.41186600  | -4.68995900 | 0.80745500  |
| H | 4.87612100  | -4.86774800 | -1.20887800 |
| H | 4.59538200  | -3.18771500 | -3.05998600 |
| H | -0.90722100 | -2.22417600 | 2.56846700  |
| H | -0.94601900 | -0.55382800 | 1.93987600  |
| H | -3.00342000 | -2.98210300 | 1.54568800  |
| H | -4.26755200 | -3.52333000 | -0.54516900 |
| H | -3.25149600 | -2.89749400 | -2.75670300 |
| H | -2.68061200 | 1.44949200  | -1.70544200 |
| H | -4.61741100 | -0.15556600 | -1.68295700 |
| H | -5.38032200 | 0.80353200  | 2.42623000  |
| H | -3.45169300 | 2.40742200  | 2.40307100  |

**(4) reaction in the water-assisted mode in the absence of catalyst reactant:**

|   |             |             |             |
|---|-------------|-------------|-------------|
| H | -1.20922800 | 1.15275800  | -1.45635000 |
| C | -1.99547800 | 0.90651800  | -0.72847800 |
| O | -2.36874800 | -0.46219000 | -0.90147700 |
| C | -3.19841200 | 1.82158500  | -0.96178400 |

|   |             |             |             |
|---|-------------|-------------|-------------|
| H | -1.59451300 | 1.07370000  | 0.27943900  |
| P | -1.67175100 | -1.65396500 | -0.01115800 |
| C | -2.74178300 | 3.28682900  | -1.02648100 |
| H | -3.64422000 | 1.54486100  | -1.92824600 |
| O | -4.22197200 | 1.67084300  | 0.01056200  |
| O | -1.50912000 | -1.16638000 | 1.41889700  |
| O | -0.11216900 | -1.66884400 | -0.73061700 |
| O | -2.28551400 | -2.95413300 | -0.38911500 |
| H | -2.23756800 | 3.57793600  | -0.09683400 |
| H | -2.05576900 | 3.46139000  | -1.86528600 |
| H | -3.61564200 | 3.93367800  | -1.15073600 |
| H | -3.87220500 | 1.28440400  | 0.84289800  |
| H | -4.11421500 | -0.11925900 | 2.68458800  |
| O | -3.37627500 | 0.44207500  | 2.41890300  |
| H | -2.66680200 | -0.19206400 | 2.11587100  |
| C | 1.02583100  | -1.03290600 | -0.40252100 |
| C | 1.28007500  | -0.41130300 | 0.84015500  |
| C | 2.03247100  | -1.03322000 | -1.39485700 |
| C | 2.50839200  | 0.19501700  | 1.06729700  |
| H | 0.50583200  | -0.42834600 | 1.59754600  |
| C | 3.25641500  | -0.43016900 | -1.16314100 |
| H | 1.81769900  | -1.52229200 | -2.33946100 |
| C | 3.49109800  | 0.18674400  | 0.07177200  |
| H | 2.72200800  | 0.67541800  | 2.01469100  |
| H | 4.03464100  | -0.42394500 | -1.91655200 |
| N | 4.77181800  | 0.82083500  | 0.32011900  |
| O | 4.95761700  | 1.35877600  | 1.41843200  |
| O | 5.62266400  | 0.79370700  | -0.57893500 |

**Transition state:**

|   |             |             |             |
|---|-------------|-------------|-------------|
| H | -1.84280500 | 1.72134300  | -2.16721900 |
| C | -2.10739500 | 1.26156900  | -1.20803500 |
| O | -1.37025200 | 0.03327100  | -1.15573900 |
| C | -3.60548100 | 0.97087300  | -1.05798000 |
| H | -1.77020700 | 1.91434300  | -0.38895400 |
| P | -1.63209800 | -1.11700200 | -0.02509500 |
| C | -4.39877600 | 2.27353900  | -0.86960000 |
| H | -3.94711800 | 0.49695700  | -2.00218700 |
| O | -3.73235000 | 0.08133800  | -0.00940500 |
| O | -1.49097400 | -0.51815600 | 1.45034400  |
| O | -0.00943600 | -1.68739900 | -0.13028200 |
| O | -2.38703100 | -2.35664700 | -0.32886600 |
| H | -4.08156300 | 2.78947600  | 0.04500100  |

|   |             |             |             |
|---|-------------|-------------|-------------|
| H | -4.26897800 | 2.95611000  | -1.72206900 |
| H | -5.46561300 | 2.04477300  | -0.77350700 |
| H | -3.85008100 | 0.46644100  | 1.30259200  |
| H | -4.27808800 | -0.04832500 | 2.80677000  |
| O | -3.67053700 | 0.55895100  | 2.36795100  |
| H | -2.33329300 | -0.15250100 | 1.88518700  |
| C | 1.13825700  | -1.00142000 | -0.05021500 |
| C | 1.26902900  | 0.31307900  | 0.45039700  |
| C | 2.29490500  | -1.68432800 | -0.49009900 |
| C | 2.51668200  | 0.91838100  | 0.49453600  |
| H | 0.39526400  | 0.83271900  | 0.81929300  |
| C | 3.53901300  | -1.08133700 | -0.44325300 |
| H | 2.17427600  | -2.69408700 | -0.86877200 |
| C | 3.64735200  | 0.22595900  | 0.04772700  |
| H | 2.63239100  | 1.92494200  | 0.87817600  |
| H | 4.42985900  | -1.59652500 | -0.78140500 |
| N | 4.94676200  | 0.86510000  | 0.09718300  |
| O | 5.01697200  | 2.02255200  | 0.53001400  |
| O | 5.93092900  | 0.22431000  | -0.29622000 |

**END**
